# Supplementary material for: Discrimination of Green Coffee (Coffea arabica and Coffea canephora) of Different Geographical Origin Based on Antioxidant Activity, High-Throughput Metabolomics, and DNA RFLP Fingerprinting
Source: MDPI journal article supplement (doi:10.3390/antiox12051135), 2023-05-21

**Supplementary Figure S6:** Sequence alignment of 5S-rRNA-NTS region using CLC software (Qiagen, Hilden, Germany). in CA and CC accessions. See Table 1 for the coding of accessions.

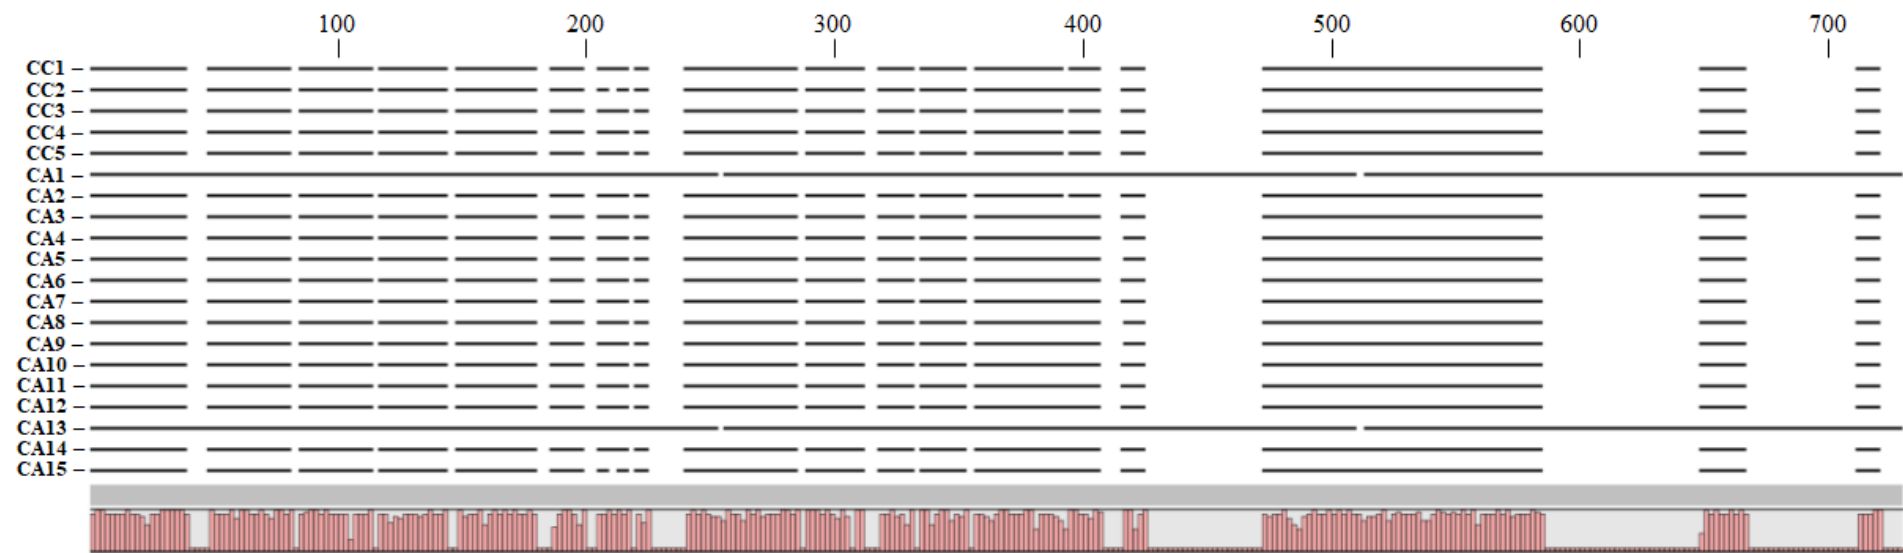

Supplement: s1 [file s1]
