# Supplementary material for: Discrimination of Green Coffee (Coffea arabica and Coffea canephora) of Different Geographical Origin Based on Antioxidant Activity, High-Throughput Metabolomics, and DNA RFLP Fingerprinting
Source: MDPI journal article supplement (doi:10.3390/antiox12051135), 2023-05-21

**Supplementary Figure S2:** Partitioning on the PC1 and PC2 factor scores of CA e CC accessions according to bioactive compounds by HPLC-DAD-ESI-MS/MS analysis.

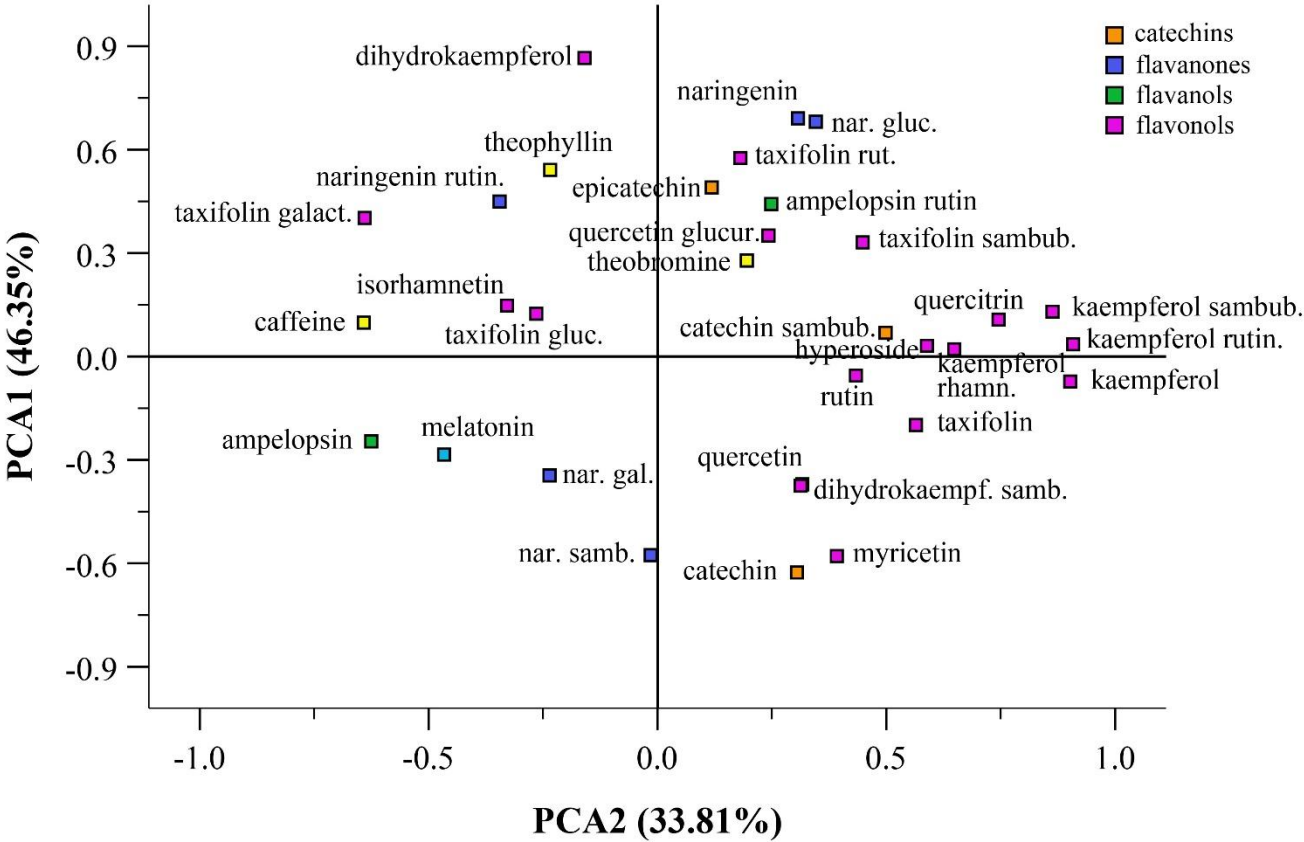

Supplement: s1 [file s1]
