# Supplementary material for: Discrimination of Green Coffee (Coffea arabica and Coffea canephora) of Different Geographical Origin Based on Antioxidant Activity, High-Throughput Metabolomics, and DNA RFLP Fingerprinting
Source: MDPI journal article supplement (doi:10.3390/antiox12051135), 2023-05-21
Supplement: s1 [file s1]

**Supplemntary Table S2:** Qualitative and quantitative composition of fatty acids present in CA and CC accessions from different geographical origin and identified and quantified by GC-MS and GC-FID. See text for abbreviations.

|      | C14                         | C16                          | C18:2                         | C18:1 Z                     | C18:1 E                      | C18                         | C20                          | C22                          | Total                         |
|------|-----------------------------|------------------------------|-------------------------------|-----------------------------|------------------------------|-----------------------------|------------------------------|------------------------------|-------------------------------|
| CC1  | 0.078 ± 0.002 <sup>ab</sup> | 31.791 ± 0.601 <sup>g</sup>  | 32.947 ± 0.496 <sup>gh</sup>  | 11.342 ± 0.113 <sup>a</sup> | 0.596 ± 0.021 <sup>ghi</sup> | 7.262 ± 0.225 <sup>de</sup> | 3.464 ± 0.061 <sup>cde</sup> | 0.961 ± 0.023 <sup>m</sup>   | 88.446 ± 3.320 <sup>fg</sup>  |
| CC2  | 0.082 ± 0.002 <sup>a</sup>  | 22.638 ± 0.641 <sup>lm</sup> | 22.692 ± 0.373 <sup>l</sup>   | 7.169 ± 0.239 <sup>e</sup>  | 0.381 ± 0.005 <sup>n</sup>   | 4.616 ± 0.100 <sup>l</sup>  | 2.135 ± 0.034 <sup>h</sup>   | 0.536 ± 0.008 <sup>op</sup>  | 60.253 ± 1.817 <sup>l</sup>   |
| CC3  | 0.062 ± 0.001 <sup>fg</sup> | 27.342 ± 1.015 <sup>h</sup>  | 28.809 ± 0.952 <sup>i</sup>   | 8.042 ± 0.238 <sup>cd</sup> | 0.511 ± 0.005 <sup>lm</sup>  | 6.099 ± 0.211 <sup>h</sup>  | 3.456 ± 0.122 <sup>cde</sup> | 1.075 ± 0.033 <sup>l</sup>   | 75.399 ± 2.165 <sup>hi</sup>  |
| CC4  | 0.033 ± 0.001 <sup>no</sup> | 8.491 ± 0.269 <sup>o</sup>   | 7.683 ± 0.278 <sup>m</sup>    | 2.074 ± 0.055 <sup>i</sup>  | 0.185 ± 0.005 <sup>o</sup>   | 1.599 ± 0.057 <sup>no</sup> | 0.86 ± 0.031 <sup>lm</sup>   | 0.246 ± 0.006 <sup>r</sup>   | 21.173 ± 0.649 <sup>n</sup>   |
| CC5  | 0.026 ± 0.001 <sup>p</sup>  | 16.54 ± 0.583 <sup>n</sup>   | 78.186 ± 3.102 <sup>a</sup>   | 1.988 ± 0.045 <sup>i</sup>  | 0.146 ± 0.005 <sup>o</sup>   | 1.898 ± 0.056 <sup>n</sup>  | 0.963 ± 0.011 <sup>l</sup>   | 0.495 ± 0.011 <sup>p</sup>   | 100.245 ± 2.289 <sup>cd</sup> |
| CA1  | 0.060 ± 0.001 <sup>g</sup>  | 34.908 ± 0.521 <sup>ef</sup> | 33.381 ± 1.099 <sup>fgh</sup> | 7.310 ± 0.202 <sup>e</sup>  | 0.696 ± 0.025 <sup>de</sup>  | 7.839 ± 0.260 <sup>bc</sup> | 3.447 ± 0.053 <sup>cde</sup> | 1.443 ± 0.048 <sup>cd</sup>  | 89.087 ± 3.136 <sup>efg</sup> |
| CA2  | 0.072 ± 0.001 <sup>cd</sup> | 36.885 ± 0.61 <sup>e</sup>   | 38.763 ± 0.976 <sup>de</sup>  | 8.211 ± 0.163 <sup>cd</sup> | 0.806 ± 0.01 <sup>c</sup>    | 7.066 ± 0.077 <sup>ef</sup> | 3.153 ± 0.047 <sup>ef</sup>  | 1.351 ± 0.041 <sup>def</sup> | 96.309 ± 1.932 <sup>cde</sup> |
| CA3  | 0.033 ± 0.001 <sup>n</sup>  | 60.763 ± 1.078 <sup>a</sup>  | 49.946 ± 1.891 <sup>b</sup>   | 1.115 ± 0.035 <sup>l</sup>  | 0.181 ± 0.006 <sup>o</sup>   | 1.291 ± 0.015 <sup>o</sup>  | 0.735 ± 0.028 <sup>m</sup>   | 0.358 ± 0.005 <sup>q</sup>   | 114.427 ± 1.934 <sup>b</sup>  |
| CA4  | 0.041 ± 0.001 <sup>m</sup>  | 46.122 ± 1.575 <sup>b</sup>  | 52.159 ± 1.749 <sup>b</sup>   | 11.469 ± 0.303 <sup>a</sup> | 1.123 ± 0.034 <sup>a</sup>   | 10.57 ± 0.115 <sup>a</sup>  | 5.007 ± 0.087 <sup>a</sup>   | 2.072 ± 0.063 <sup>a</sup>   | 128.568 ± 2.879 <sup>a</sup>  |
| CA5  | 0.063 ± 0.002 <sup>ef</sup> | 32.519 ± 0.546 <sup>fg</sup> | 31.6 ± 0.597 <sup>hi</sup>    | 5.761 ± 0.165 <sup>f</sup>  | 0.653 ± 0.017 <sup>ef</sup>  | 6.745 ± 0.156 <sup>fg</sup> | 3.898 ± 0.121 <sup>b</sup>   | 1.533 ± 0.041 <sup>c</sup>   | 82.775 ± 2.463 <sup>gh</sup>  |
| CA6  | 0.066 ± 0.001 <sup>ef</sup> | 26.831 ± 0.731 <sup>hi</sup> | 28.075 ± 0.904 <sup>i</sup>   | 5.321 ± 0.127 <sup>fg</sup> | 0.568 ± 0.021 <sup>hi</sup>  | 5.538 ± 0.126 <sup>j</sup>  | 3.214 ± 0.06 <sup>ef</sup>   | 1.263 ± 0.028 <sup>fgh</sup> | 70.879 ± 1.734 <sup>i</sup>   |
| CA7  | 0.048 ± 0.001 <sup>hi</sup> | 20.905 ± 0.315 <sup>m</sup>  | 20.028 ± 0.51 <sup>l</sup>    | 4.396 ± 0.163 <sup>h</sup>  | 0.471 ± 0.014 <sup>m</sup>   | 3.937 ± 0.080 <sup>m</sup>  | 1.647 ± 0.035 <sup>j</sup>   | 0.594 ± 0.016 <sup>o</sup>   | 52.030 ± 1.471 <sup>m</sup>   |
| CA8  | 0.047 ± 0.001 <sup>il</sup> | 43.467 ± 1.287 <sup>c</sup>  | 49.015 ± 0.53 <sup>b</sup>    | 9.541 ± 0.097 <sup>b</sup>  | 1.160 ± 0.026 <sup>a</sup>   | 8.225 ± 0.185 <sup>b</sup>  | 3.769 ± 0.051 <sup>b</sup>   | 1.689 ± 0.027 <sup>b</sup>   | 116.917 ± 4.475 <sup>b</sup>  |
| CA9  | 0.049 ± 0.001 <sup>hi</sup> | 27.361 ± 0.423 <sup>h</sup>  | 30.672 ± 0.628 <sup>hi</sup>  | 5.584 ± 0.13 <sup>f</sup>   | 0.612 ± 0.012 <sup>fgh</sup> | 5.273 ± 0.063 <sup>i</sup>  | 2.499 ± 0.091 <sup>g</sup>   | 0.818 ± 0.027 <sup>n</sup>   | 72.871 ± 1.145 <sup>i</sup>   |
| CA10 | 0.077 ± 0.002 <sup>cb</sup> | 24.391 ± 0.787 <sup>il</sup> | 22.340 ± 0.693 <sup>j</sup>   | 4.807 ± 0.088 <sup>gh</sup> | 0.546 ± 0.015 <sup>il</sup>  | 5.477 ± 0.175 <sup>j</sup>  | 3.070 ± 0.049 <sup>f</sup>   | 1.334 ± 0.027 <sup>efg</sup> | 62.046 ± 1.578 <sup>j</sup>   |
| CA11 | 0.042 ± 0.001 <sup>lm</sup> | 39.444 ± 0.509 <sup>d</sup>  | 42.825 ± 0.855 <sup>c</sup>   | 7.851 ± 0.238 <sup>d</sup>  | 0.798 ± 0.013 <sup>c</sup>   | 7.239 ± 0.215 <sup>de</sup> | 3.834 ± 0.076 <sup>b</sup>   | 1.476 ± 0.028 <sup>c</sup>   | 103.511 ± 3.080 <sup>c</sup>  |
| CA12 | 0.045 ± 0.001 <sup>lm</sup> | 43.571 ± 0.682 <sup>a</sup>  | 48.782 ± 0.877 <sup>b</sup>   | 8.423 ± 0.234 <sup>c</sup>  | 0.871 ± 0.009 <sup>b</sup>   | 7.595 ± 0.086 <sup>cd</sup> | 3.980 ± 0.110 <sup>b</sup>   | 1.366 ± 0.033 <sup>de</sup>  | 114.637 ± 2.211 <sup>b</sup>  |
| CA13 | 0.028 ± 0.001 <sup>op</sup> | 35.279 ± 0.487 <sup>e</sup>  | 41.296 ± 0.496 <sup>cd</sup>  | 7.029 ± 0.175 <sup>e</sup>  | 0.723 ± 0.02 <sup>d</sup>    | 6.384 ± 0.144 <sup>gh</sup> | 3.498 ± 0.035 <sup>c</sup>   | 1.241 ± 0.034 <sup>ghi</sup> | 95.481 ± 3.402 <sup>def</sup> |
| CA14 | 0.052 ± 0.001 <sup>h</sup>  | 32.191 ± 1.211 <sup>g</sup>  | 36.002 ± 0.756 <sup>efg</sup> | 6.794 ± 0.159 <sup>e</sup>  | 0.579 ± 0.022 <sup>hi</sup>  | 6.432 ± 0.169 <sup>gh</sup> | 3.250 ± 0.044 <sup>def</sup> | 1.196 ± 0.028 <sup>hi</sup>  | 86.501 ± 2.531 <sup>g</sup>   |
| CA15 | 0.068 ± 0.001 <sup>de</sup> | 34.714 ± 0.529 <sup>ef</sup> | 36.744 ± 1.135 <sup>ef</sup>  | 6.911 ± 0.073 <sup>e</sup>  | 0.635 ± 0.009 <sup>fgh</sup> | 6.403 ± 0.084 <sup>gh</sup> | 3.317 ± 0.099 <sup>cde</sup> | 1.159 ± 0.029 <sup>il</sup>  | 89.954 ± 1.555 <sup>efg</sup> |
