# Supplementary material for: Discrimination of Green Coffee (Coffea arabica and Coffea canephora) of Different Geographical Origin Based on Antioxidant Activity, High-Throughput Metabolomics, and DNA RFLP Fingerprinting
Source: MDPI journal article supplement (doi:10.3390/antiox12051135), 2023-05-21
Supplement: s1 [file s1]

# Supplementary Data S2: PCR products of 5S-rRNA-NTS region separated by the Agilent 2100 Bioanalyzer and reporting the electropherograms of CA e CC accessions before and after digestion with *MseI* and *XhoII*.

2100\_expert\_DNA 1000\_DE34903611\_2023-03-06\_1\_10.xad

Page 1 of 17

Assay Class: DNA 1000  
Data Path: C:\...-30\2100\_expert\_DNA 1000\_DE34903611\_2023-03-06\_NTS\_1\_10.xad

Created: 3/08/2023 8:30:21 AM  
Modified: 3/08/2023 8:30:21 AM

## Electrophoresis File Run Summary

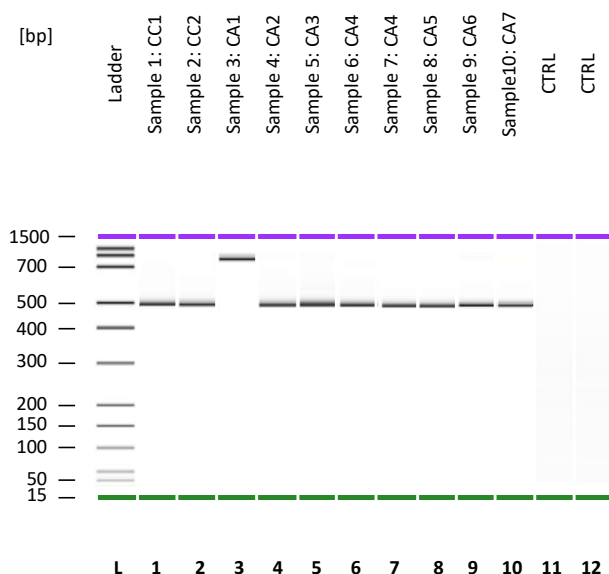

### Instrument Information:

Instrument Name: DE34903611

Firmware: C.01.069

Serial #: DE34903611

Type: G2938C

### Assay Information:

Assay Origin Path: C:\Program Files\Agilent\2100 bioanalyzer\2100\_expert\assays\dsDNA\DNA 1000 Series II.xsy

Assay Class: DNA 1000

Version: 2.3

Assay Comments: DNA Analysis 2 - 1000 bp

© Copyright 2003-2009 Agilent Technologies, Inc.

### Chip Information:

Chip Lot #:

Reagent Kit Lot #:

Chip Comments:

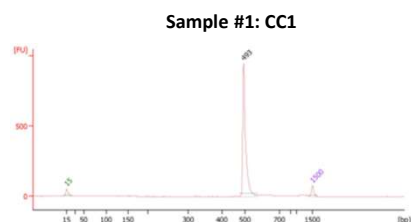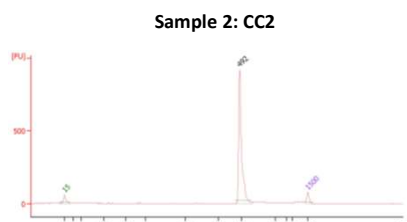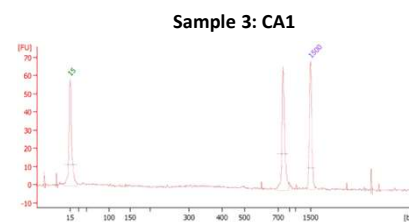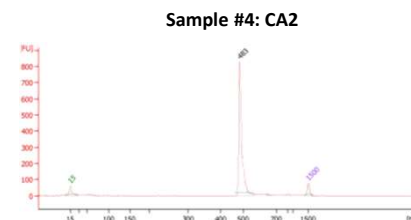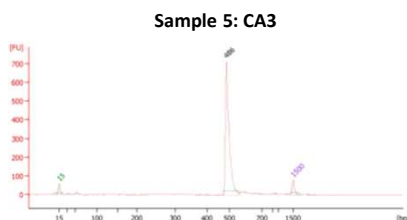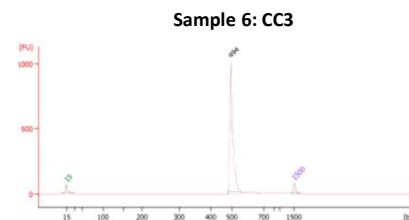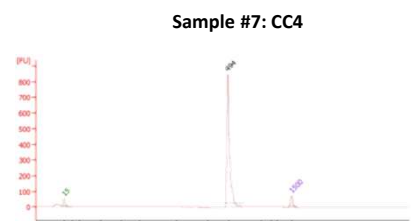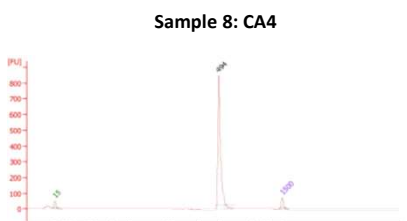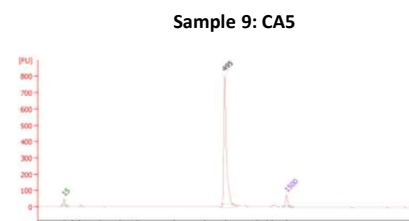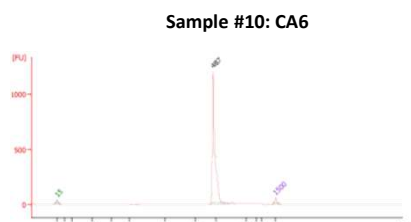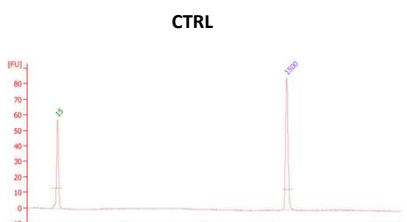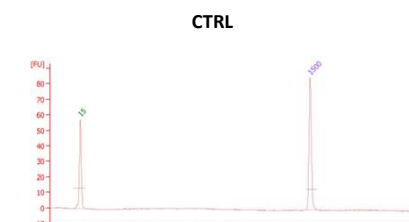

Assay Class: DNA 1000  
Data Path: C:\...-30\2100\_expert\_DNA 1000\_DE34903611\_2023-03-06\_NTS\_1\_10.xad

Created: 3/08/2023 8:30:21 AM  
Modified: 3/08/2023 8:30:21 AM

Electrophoresis File Run Summary

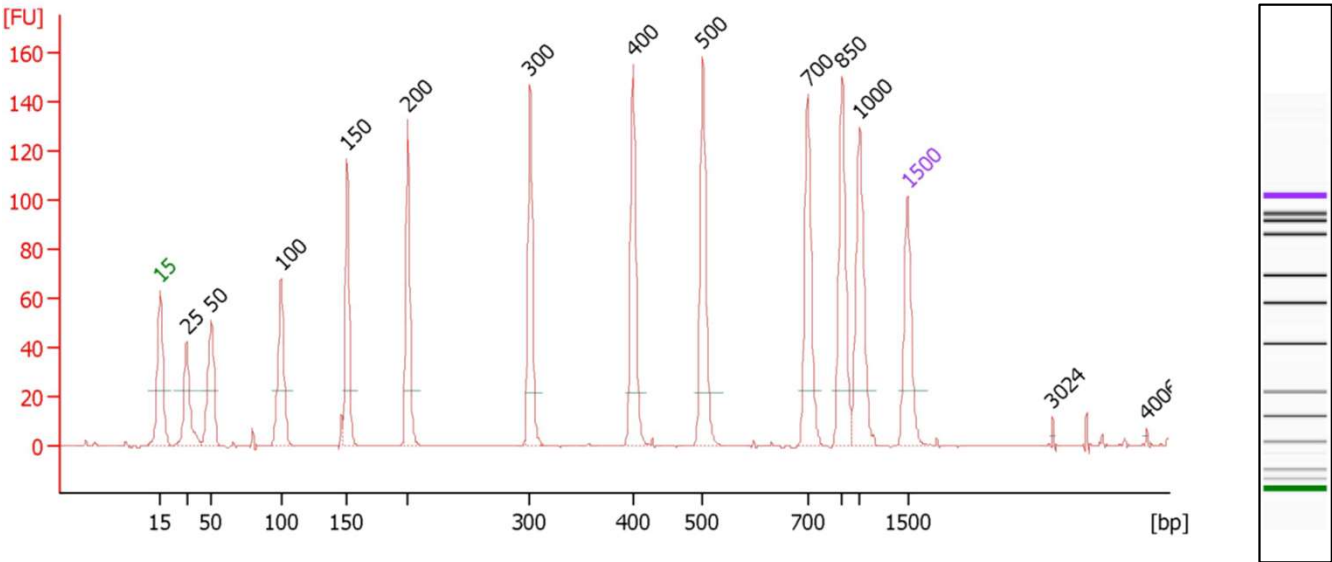

Peak table for Ladder :

| Peak | Size [bp] | Conc. [ng/μl] | Molarity [nmol/l] | Observations |
|------|-----------|---------------|-------------------|--------------|
| 1    | 15        | 4.20          | 4.4.2             | Lower Marker |
| 2    | 25        | 4.00          | 242.4             | Ladder Peak  |
| 3    | 50        | 4.00          | 121.2             | Ladder Peak  |
| 4    | 100       | 4.00          | 60.6              | Ladder Peak  |
| 5    | 150       | 4.00          | 40.3              | Ladder Peak  |
| 6    | 200       | 4.00          | 30.3              | Ladder Peak  |
| 7    | 300       | 4.00          | 20.2              | Ladder Peak  |
| 8    | 400       | 4.00          | 15.2              | Ladder Peak  |
| 9    | 500       | 4.00          | 12.1              | Ladder Peak  |
| 10   | 700       | 4.00          | 8.7               | Ladder Peak  |
| 11   | 850       | 4.00          | 7.1               | Ladder Peak  |
| 12   | 1,000     | 4.00          | 6.1               | Ladder Peak  |
| 13   | 1,500     | 2.10          | 2.1               | Upper Marker |
| 14   | 3,024     | 0.00          | 0.00              |              |
| 15   | 4,006     | 0.00          | 0.00              |              |

Assay Class: DNA 1000  
Data Path: C:\...-30\2100\_expert\_DNA 1000\_DE34903611\_2023-03-06\_NTS\_1\_10.xad

Created: 3/08/2023 8:30:21 AM  
Modified: 3/08/2023 8:30:21 AM

Electrophoresis File Run Summary

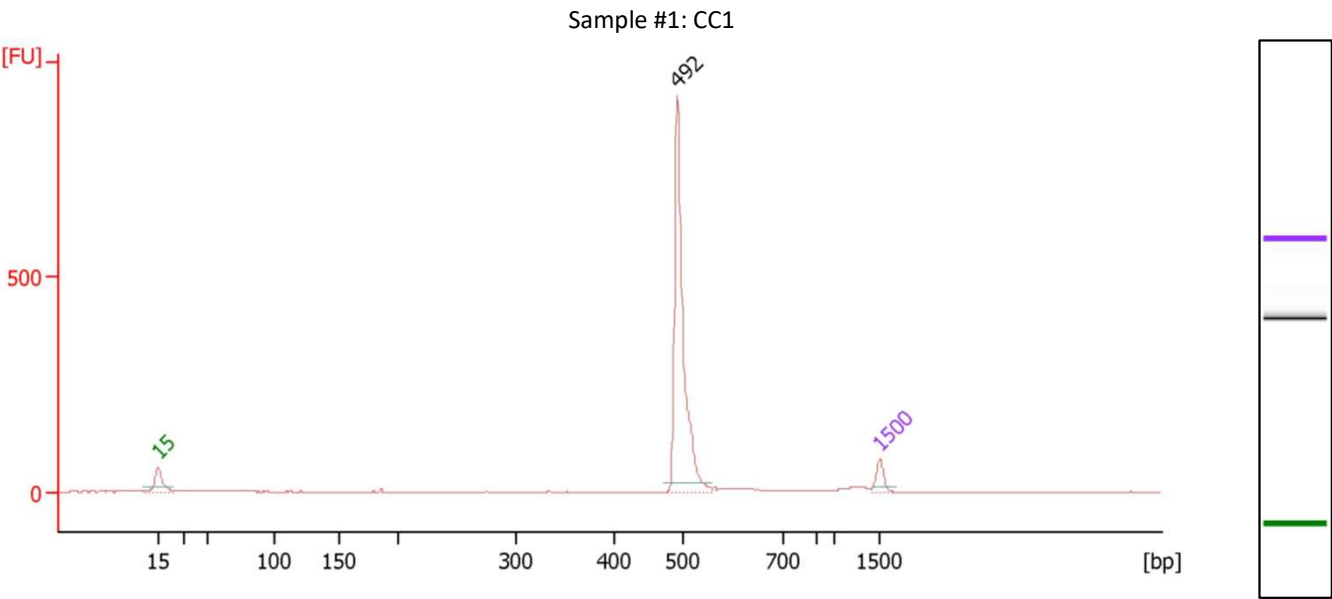

Peak table for Sample #1 :

| Peak | Size [bp] | Conc. [ng/μl] | Molarity [nmol/l] | Observations |
|------|-----------|---------------|-------------------|--------------|
| 1    | 15        | 4.20          | 424.4             | Lower Marker |
| 2    | 492       | 33.52         | 103.2             | Ladder Peak  |
| 3    | 1,500     | 2.10          | 2.2               | Upper Marker |

Assay Class: DNA 1000  
Data Path: C:\...-30\2100\_expert\_DNA 1000\_DE34903611\_2023-03-06\_NTS\_1\_10.xad

Created: 3/08/2023 8:30:21 AM  
Modified: 3/08/2023 8:30:21 AM

Electrophoresis File Run Summary

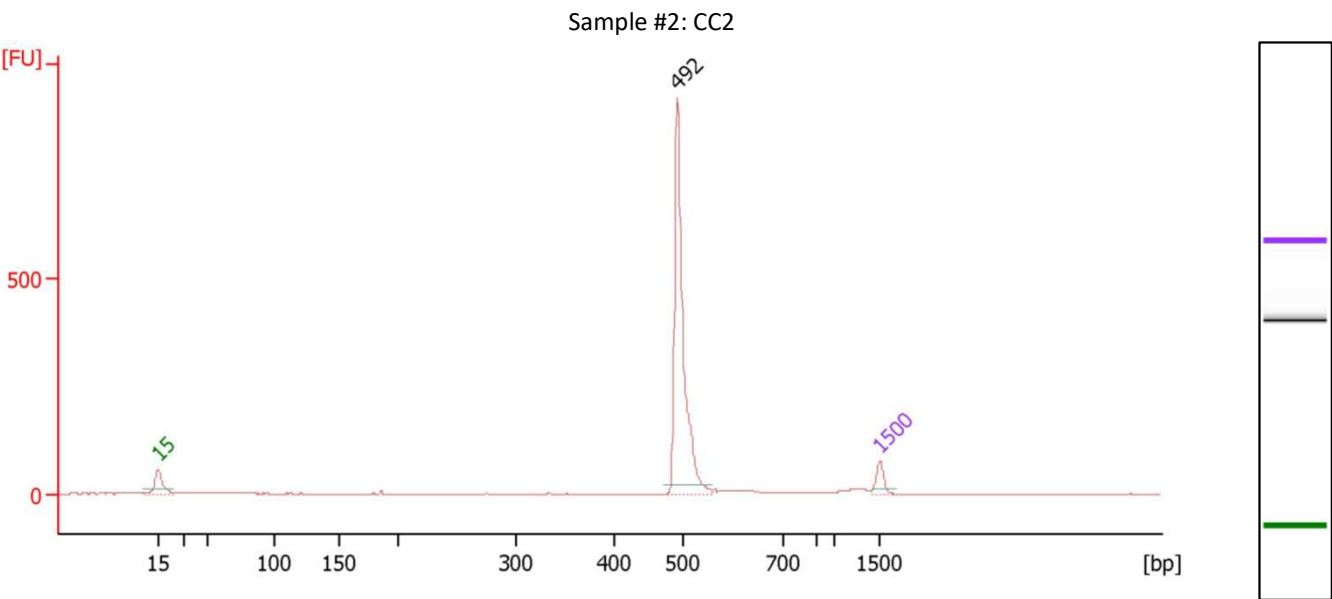

Peak table for Sample #2 :

| Peak | Size [bp] | Conc. [ng/μl] | Molarity [nmol/l] | Observations |
|------|-----------|---------------|-------------------|--------------|
| 1    | 15        | 4.20          | 424.4             | Lower Marker |
| 2    | 492       | 33.52         | 103.2             | Ladder Peak  |
| 3    | 1,500     | 2.10          | 2.2               | Upper Marker |

Assay Class: DNA 1000  
Data Path: C:\...-30\2100 expert\_DNA 1000\_DE34903611\_2023-03-06\_NTS\_1\_10.xad

Created: 3/08/2023 8:30:21 AM  
Modified: 3/08/2023 8:30:21 AM

Electrophoresis File Run Summary

Sample #3: CA1

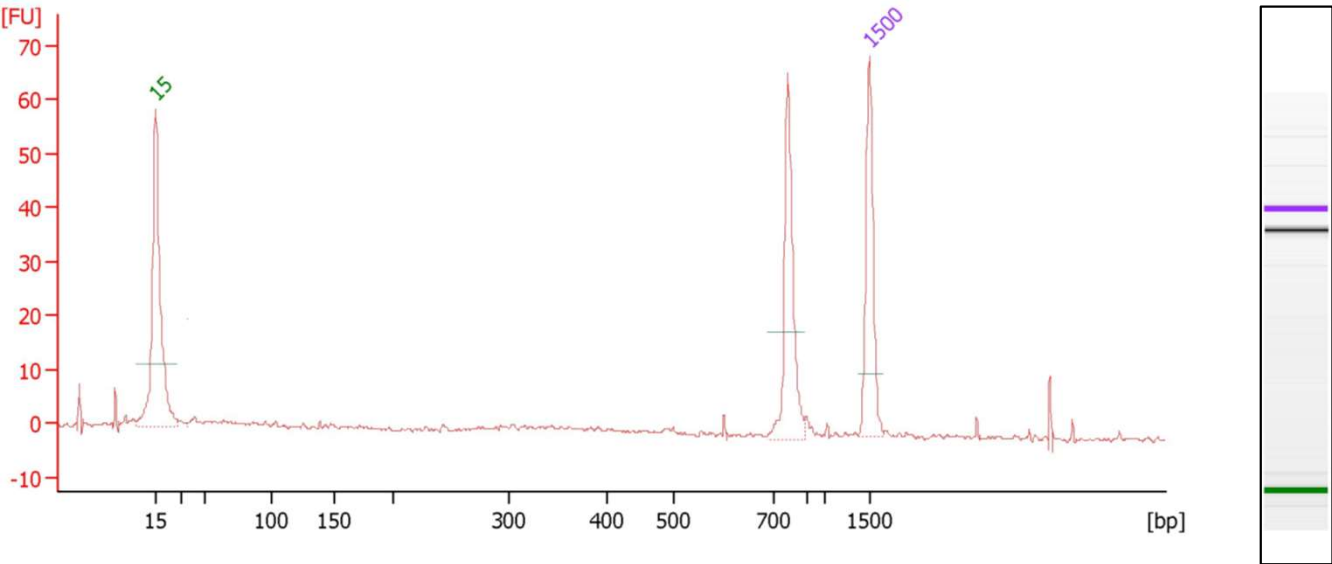

Peak table for Sample #3 :

| Peak | Size [bp] | Conc. [ng/μl] | Molarity [nmol/l] | Observations |
|------|-----------|---------------|-------------------|--------------|
| 1    | 15        | 4.20          | 424.4             | Lower Marker |
| 2    | 725       | 35.91         | 110.3             | Ladder Peak  |
| 3    | 1,500     | 2.10          | 2.1               | Upper Marker |

Assay Class: DNA 1000  
Data Path: C:\...-30\2100 expert\_DNA 1000\_DE34903611\_2023-03-06\_NTS\_1\_10.xad

Created: 3/08/2023 8:30:21 AM  
Modified: 3/08/2023 8:30:21 AM

Electrophoresis File Run Summary

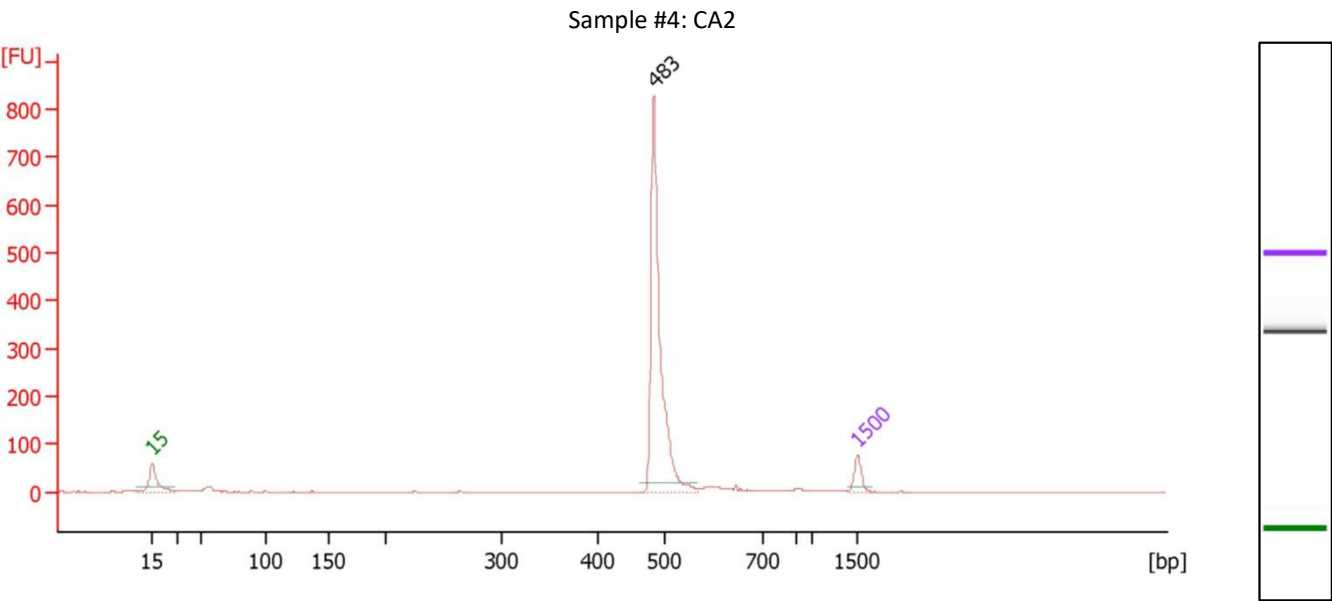

Peak table for Sample #4 :

| Peak | Size [bp] | Conc. [ng/μl] | Molarity [nmol/l] | Observations |
|------|-----------|---------------|-------------------|--------------|
| 1    | 15        | 4.20          | 424.2             | Lower Marker |
| 2    | 483       | 32.87         | 102.4             | Ladder Peak  |
| 3    | 1,500     | 2.10          | 2.1               | Upper Marker |

Assay Class: DNA 1000  
Data Path: C:\...-30\2100\_expert\_DNA 1000\_DE34903611\_2023-03-06\_NTS\_1\_10.xad

Created: 3/08/2023 8:30:21 AM  
Modified: 3/08/2023 8:30:21 AM

Electrophoresis File Run Summary

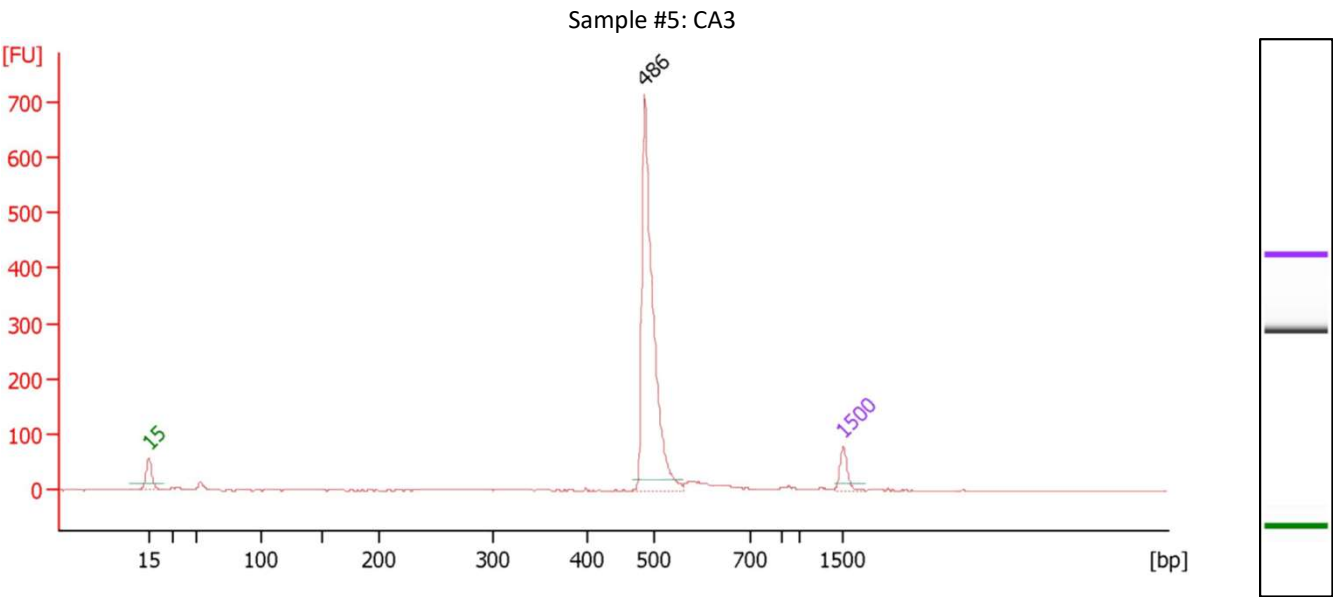

Peak table for Sample #5 :

| Peak | Size [bp] | Conc. [ng/μl] | Molarity [nmol/l] | Observations |
|------|-----------|---------------|-------------------|--------------|
| 1    | 15        | 4.20          | 424.2             | Lower Marker |
| 2    | 486       | 32.87         | 102.4             | Ladder Peak  |
| 3    | 1,500     | 2.10          | 2.1               | Upper Marker |

Assay Class: DNA 1000  
Data Path: C:\...-30\2100\_expert\_DNA 1000\_DE34903611\_2023-03-06\_NTS\_1\_10.xad

Created: 3/08/2023 8:30:21 AM  
Modified: 3/08/2023 8:30:21 AM

Electrophoresis File Run Summary

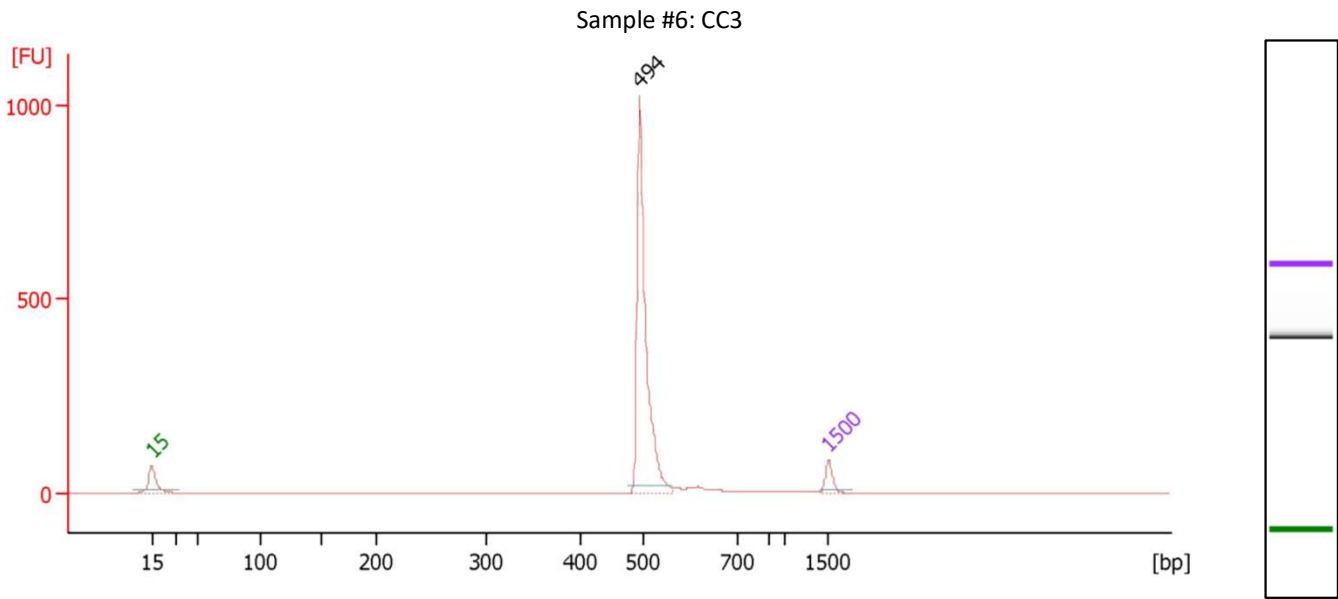

Peak table for Sample #6 :

| Peak | Size [bp] | Conc. [ng/μl] | Molarity [nmol/l] | Observations |
|------|-----------|---------------|-------------------|--------------|
| 1    | 15        | 4.20          | 424.2             | Lower Marker |
| 2    | 494       | 34.19         | 104.9             | Ladder Peak  |
| 3    | 1,500     | 2.10          | 2.1               | Upper Marker |

Assay Class: DNA 1000  
Data Path: C:\...-30\2100\_expert\_DNA 1000\_DE34903611\_2023-03-06\_NTS\_1\_10.xad

Created: 3/08/2023 8:30:21 AM  
Modified: 3/08/2023 8:30:21 AM

Electrophoresis File Run Summary

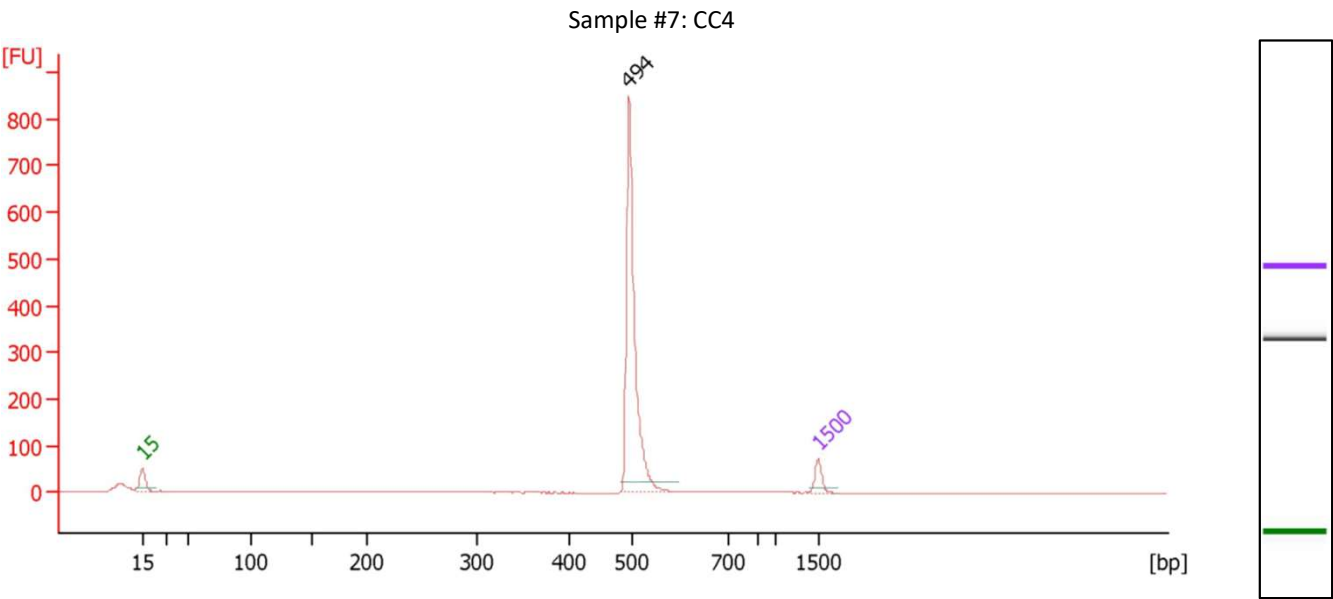

Peak table for Sample #7 :

| Peak | Size [bp] | Conc. [ng/μl] | Molarity [nmol/l] | Observations |
|------|-----------|---------------|-------------------|--------------|
| 1    | 15        | 4.20          | 424.4             | Lower Marker |
| 2    | 494       | 33.90         | 104.0             | Ladder Peak  |
| 3    | 1,500     | 2.10          | 2.2               | Upper Marker |

Assay Class: DNA 1000  
Data Path: C:\...-30\2100\_expert\_DNA 1000\_DE34903611\_2023-03-06\_NTS\_1\_10.xad

Created: 3/08/2023 8:30:21 AM  
Modified: 3/08/2023 8:30:21 AM

Electrophoresis File Run Summary

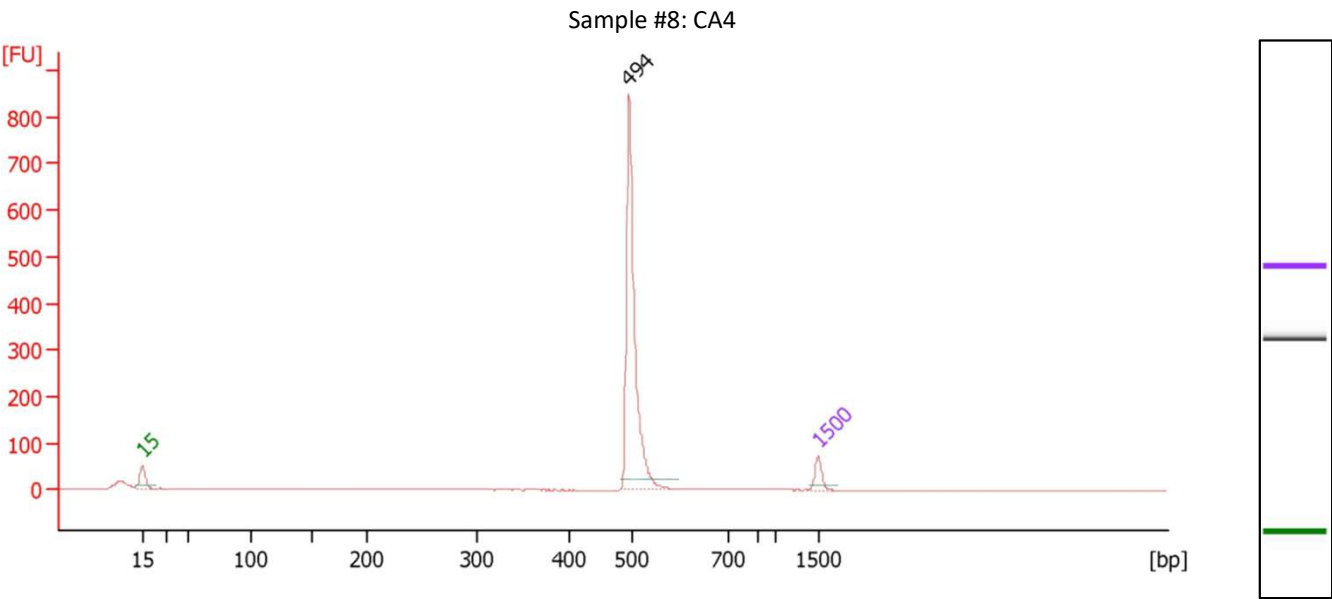

Peak table for Sample #8 :

| Peak | Size [bp] | Conc. [ng/μl] | Molarity [nmol/l] | Observations |
|------|-----------|---------------|-------------------|--------------|
| 1    | 15        | 4.20          | 424.4             | Lower Marker |
| 2    | 494       | 33.90         | 104.0             | Ladder Peak  |
| 3    | 1,500     | 2.10          | 2.2               | Upper Marker |

Assay Class: DNA 1000  
Data Path: C:\...-30\2100\_expert\_DNA 1000\_DE34903611\_2023-03-06\_NTS\_1\_10.xad

Created: 3/08/2023 8:30:21 AM  
Modified: 3/08/2023 8:30:21 AM

Electrophoresis File Run Summary

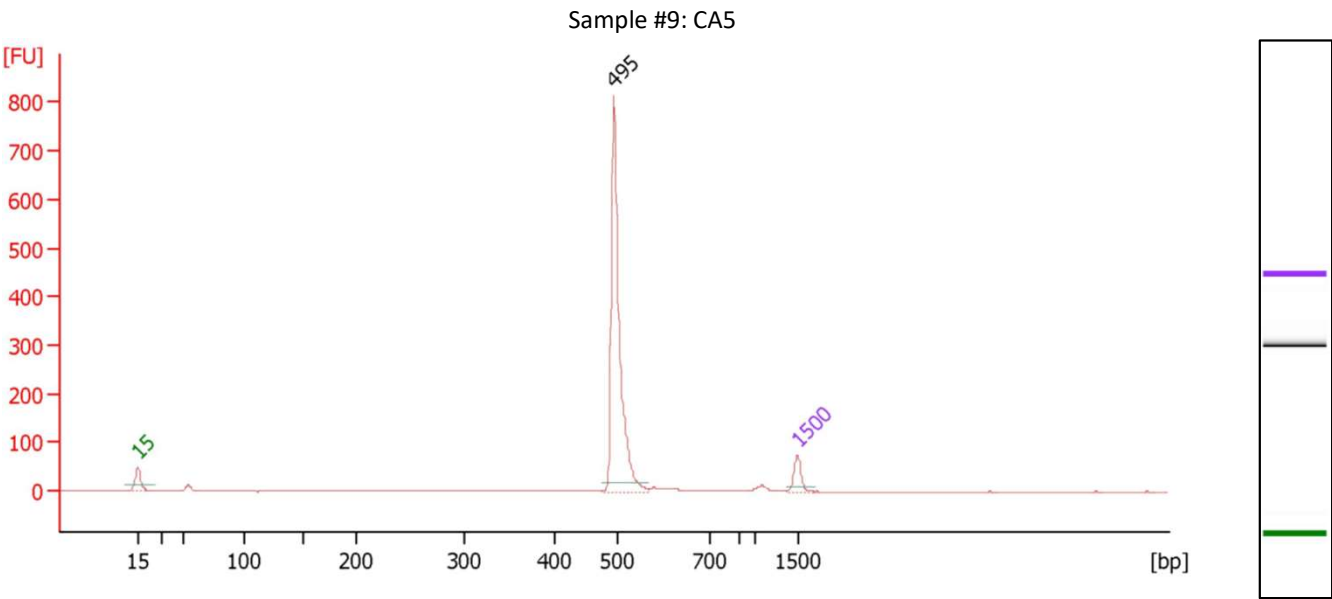

Peak table for Sample #9 :

| Peak | Size [bp] | Conc. [ng/μl] | Molarity [nmol/l] | Observations |
|------|-----------|---------------|-------------------|--------------|
| 1    | 15        | 4.20          | 424.4             | Lower Marker |
| 2    | 495       | 29.43         | 90.1              | Ladder Peak  |
| 3    | 1,500     | 2.10          | 2.2               | Upper Marker |

Assay Class: DNA 1000  
Data Path: C:\...-30\2100 expert\_DNA 1000\_DE34903611\_2023-03-06\_NTS\_1\_10.xad

Created: 3/08/2023 8:30:21 AM  
Modified: 3/08/2023 8:30:21 AM

Electrophoresis File Run Summary

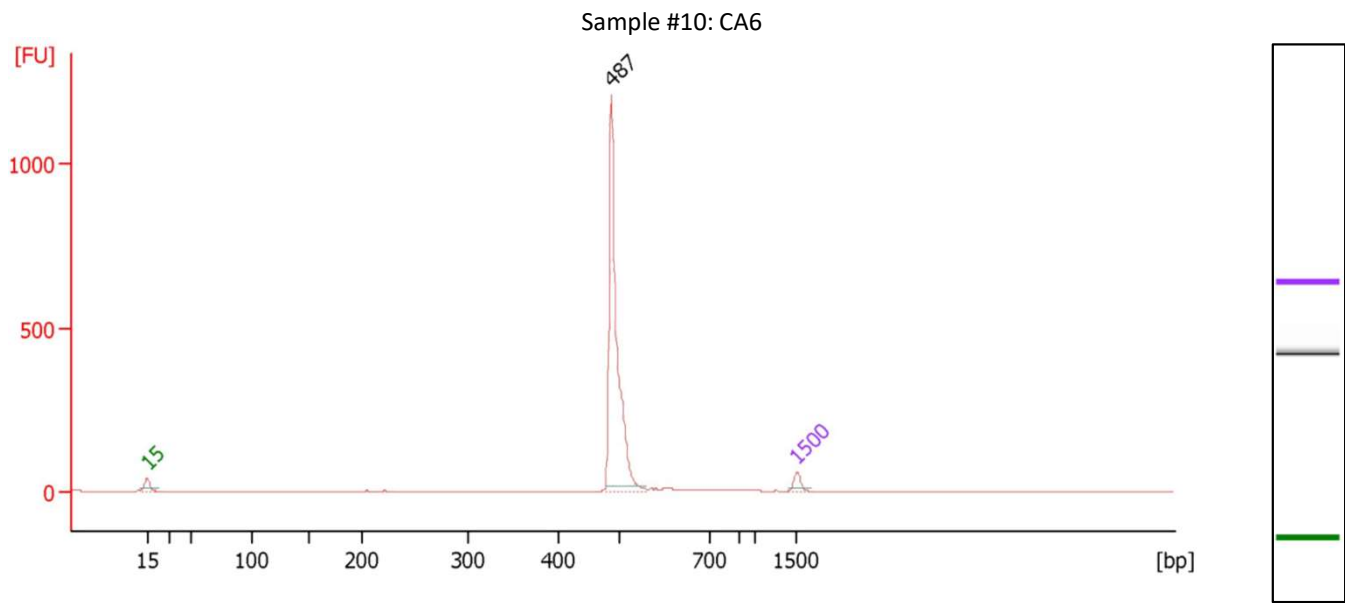

Peak table for Sample #10 :

| Peak | Size [bp] | Conc. [ng/μl] | Molarity [nmol/l] | Observations |
|------|-----------|---------------|-------------------|--------------|
| 1    | 15        | 4.20          | 424.4             | Lower Marker |
| 2    | 487       | 55.17         | 171.6             | Ladder Peak  |
| 3    | 1,500     | 2.10          | 2.1               | Upper Marker |

Assay Class: DNA 1000  
Data Path: C:\...-30\2100\_expert\_DNA 1000\_DE34903611\_2023-03-06\_NTS\_1\_10.xad

Created: 3/08/2023 8:30:21 AM  
Modified: 3/08/2023 8:30:21 AM

Electrophoresis File Run Summary

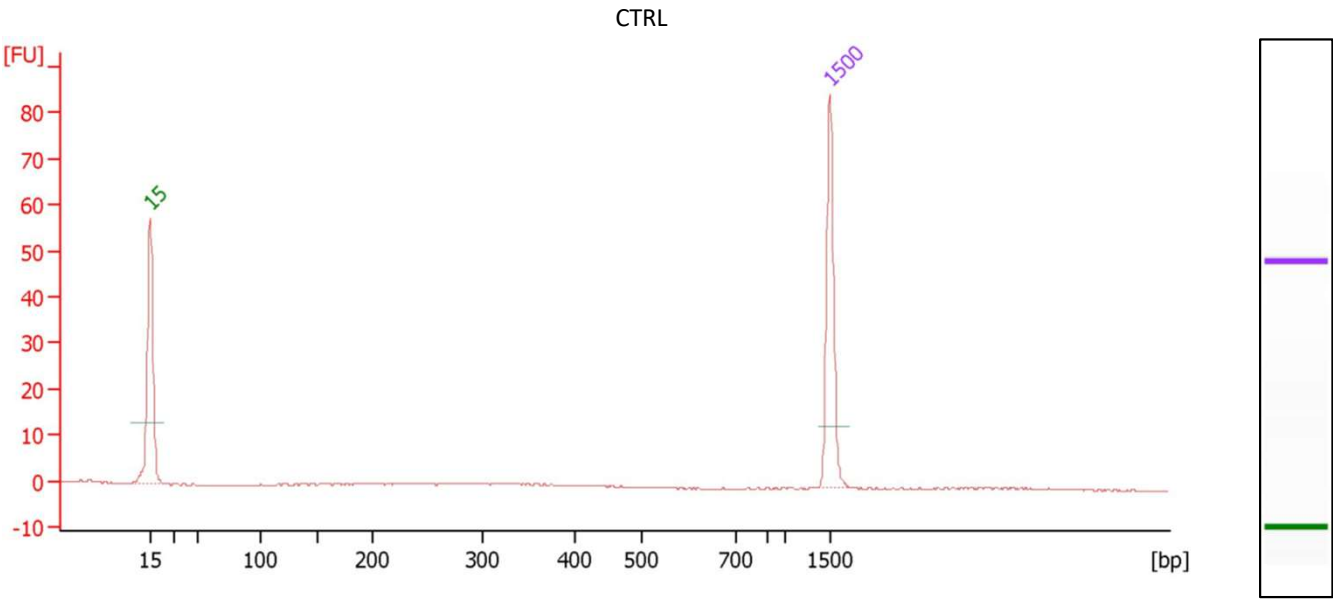

Peak table for Sample CTRL :

| Peak | Size [bp] | Conc. [ng/μl] | Molarity [nmol/l] | Observations |
|------|-----------|---------------|-------------------|--------------|
| 1    | 15        | 4.20          | 424.4             | Lower Marker |
| 2    | 1,500     | 2.10          | 2.2               | Upper Marker |

Assay Class: DNA 1000  
Data Path: C:\...-30\2100\_expert\_DNA 1000\_DE34903611\_2023-03-06\_NTS\_1\_10.xad

Created: 3/08/2023 8:30:21 AM  
Modified: 3/08/2023 8:30:21 AM

Electrophoresis File Run Summary

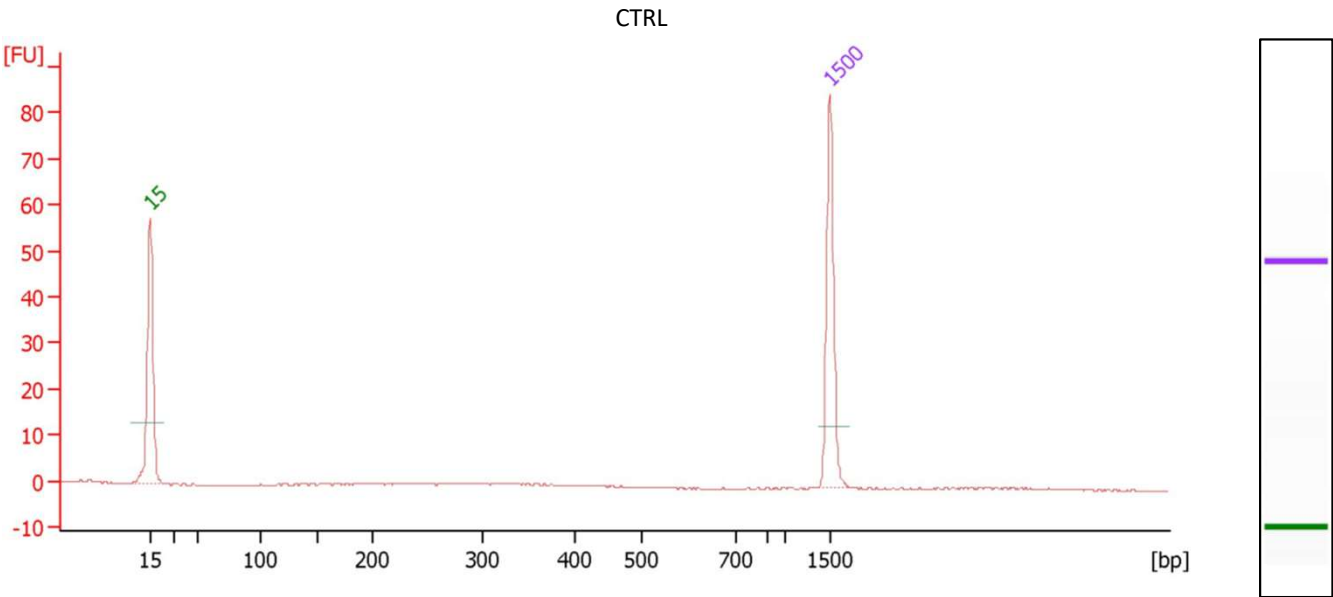

Peak table for Sample CTRL :

| Peak | Size [bp] | Conc. [ng/μl] | Molarity [nmol/l] | Observations |
|------|-----------|---------------|-------------------|--------------|
| 1    | 15        | 4.20          | 424.4             | Lower Marker |
| 2    | 1,500     | 2.10          | 2.1               | Upper Marker |

Assay Class: DNA 1000  
Data Path: C:\...-30\2100\_expert\_DNA 1000\_DE34903611\_2023-03-06\_NTS\_1\_10.xad

Created: 3/08/2023 8:30:21 AM  
Modified: 3/08/2023 8:30:21 AM

Curves

Standard Curve

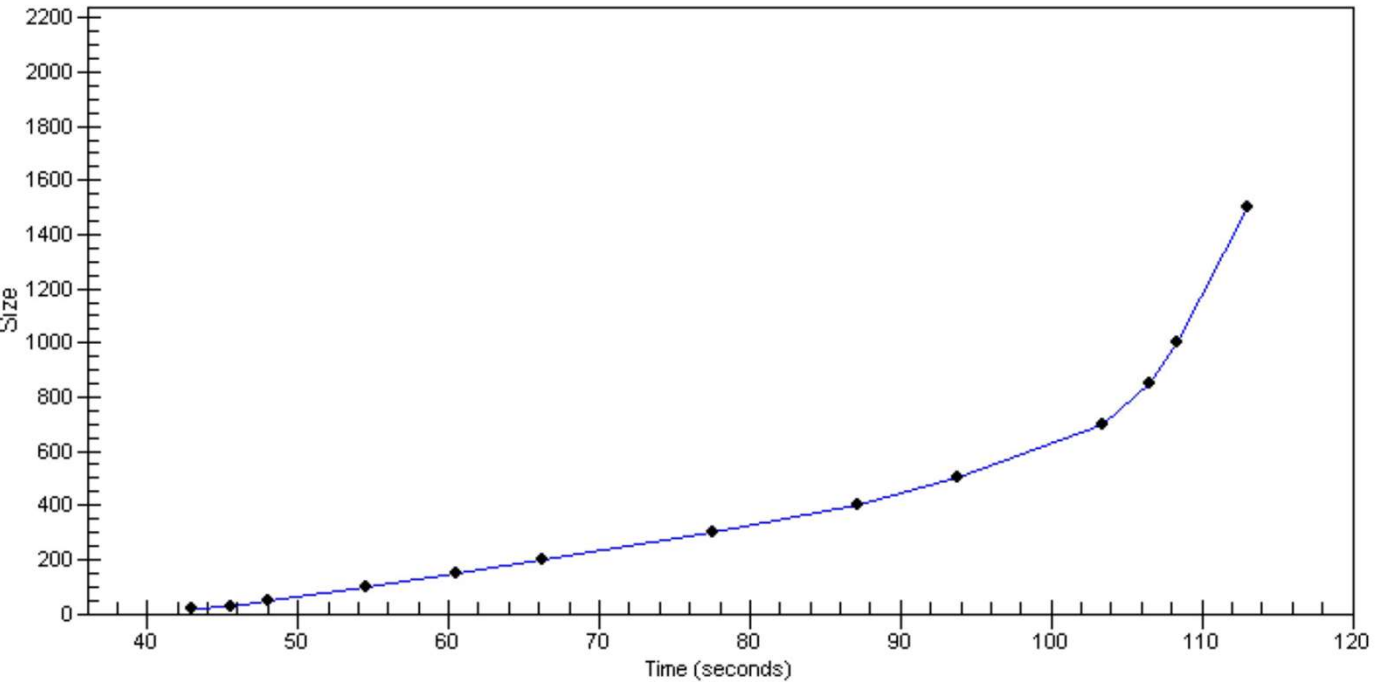

Assay Class: DNA 1000  
Data Path: C:\...-30\2100\_expert\_DNA\_1000\_DE34903611\_2023-03-06\_NTS\_1\_10.xad

Created: 3/08/2023 8:30:21 AM  
Modified: 3/08/2023 8:30:21 AM

Electrophoresis File Run Summary (Chip Summary)

| Sample Name | Sample Content | Rest. Digest             | Status | Observation | Result Label | Result Color |
|-------------|----------------|--------------------------|--------|-------------|--------------|--------------|
| Sample #1   |                | <input type="checkbox"/> | ✓      |             |              |              |
| Sample #2   |                | <input type="checkbox"/> | ✓      |             |              |              |
| Sample #3   |                | <input type="checkbox"/> | ✓      |             |              |              |
| Sample #4   |                | <input type="checkbox"/> | ✓      |             |              |              |
| Sample #5   |                | <input type="checkbox"/> | ✓      |             |              |              |
| Sample #6   |                | <input type="checkbox"/> | ✓      |             |              |              |
| Sample #7   |                | <input type="checkbox"/> | ✓      |             |              |              |
| Sample #8   |                | <input type="checkbox"/> | ✓      |             |              |              |
| Sample #9   |                | <input type="checkbox"/> | ✓      |             |              |              |
| Sample #10  |                | <input type="checkbox"/> | ✓      |             |              |              |
| CTRL        |                | <input type="checkbox"/> | ✓      |             |              |              |
| CTRL        |                | <input type="checkbox"/> | ✓      |             |              |              |

Chip Lot #

Reagent Kit Lot #

Chip Comments :

Assay Class: DNA 1000  
Data Path: C:\...-30\2100\_expert\_DNA\_1000\_DE34903611\_2023-03-06\_NTS\_1\_10.xad

Created: 3/08/2023 8:30:21 AM  
Modified: 3/08/2023 8:30:21 AM

Electrophoresis Assay Details

| General Analysis Settings                               | Result Label | Result Color |
|---------------------------------------------------------|--------------|--------------|
| Number of Available Sample and Ladder Wells (Max.) : 13 |              |              |
| Minimum Visible Range [s] : 30                          |              |              |
| Maximum Visible Range [s] : 129                         |              |              |
| Start Analysis Time Range [s] : 30                      |              |              |
| End Analysis Time Range [s] : 128.95                    |              |              |
| Ladder Concentration [ng/μl] : 44                       |              |              |
| Uses Standard Area for Ladder Fragments                 |              |              |
| Lower Marker Concentration [ng/μl] : 4.2                |              |              |
| Upper Marker Concentration [ng/μl] : 2.1                |              |              |
| Used Upper Marker for Quantitation                      |              |              |
| Standard Curve Fit is Point to Point                    |              |              |
| Show Data Aligned to Lower and Upper Marker             |              |              |

Integrator Settings

Integration Start Time [s] : 30  
Integration End Time [s] : 128.95  
Slope Threshold : 0.5  
Height Threshold [FU] : 20  
Area Threshold : 0.1  
Width Threshold [s] : 0.5  
Baseline Plateau [s] : 0.5

Filter Settings

Filter Width [s] : 0.5  
Polynomial Order : 4

Ladder

| Ladder Peak | Size | Area |
|-------------|------|------|
| 1           | 15   | 25   |
| 2           | 25   | 26   |
| 3           | 50   | 34   |
| 4           | 100  | 41   |
| 5           | 150  | 45   |
| 6           | 200  | 52   |
| 7           | 300  | 63   |
| 8           | 400  | 76   |
| 9           | 500  | 83   |
| 10          | 700  | 88   |
| 11          | 850  | 86   |
| 12          | 1000 | 90   |
| 13          | 1500 | 52   |

Assay Class: DNA 1000  
Data Path: C:\...-30\2100 expert\_DNA 1000\_DE34903611\_2023-03-06\_NTS\_11\_20.xad

Created: 3/08/2023 11:25:12 AM  
Modified: 3/08/2023 11:25:12 AM

Electrophoresis File Run Summary

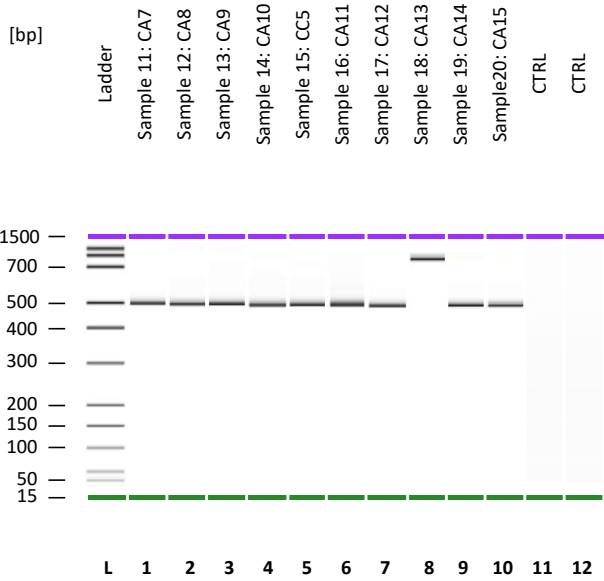

Instrument Information:

Instrument Name: DE34903611  
Serial #: DE34903611  
Firmware: C.01.069  
Type: G2938C

Assay Information:

Assay Origin Path: C:\Program Files\Agilent\2100 bioanalyzer\2100 expert\assays\dsDNA\DNA 1000 Series II.xsy  
Assay Class: DNA 1000  
Version: 2.3  
Assay Comments: DNA Analysis 2 - 1000 bp

© Copyright 2003-2009 Agilent Technologies, Inc.

Chip Information:

Chip Lot #:  
Reagent Kit Lot #:  
Chip Comments:

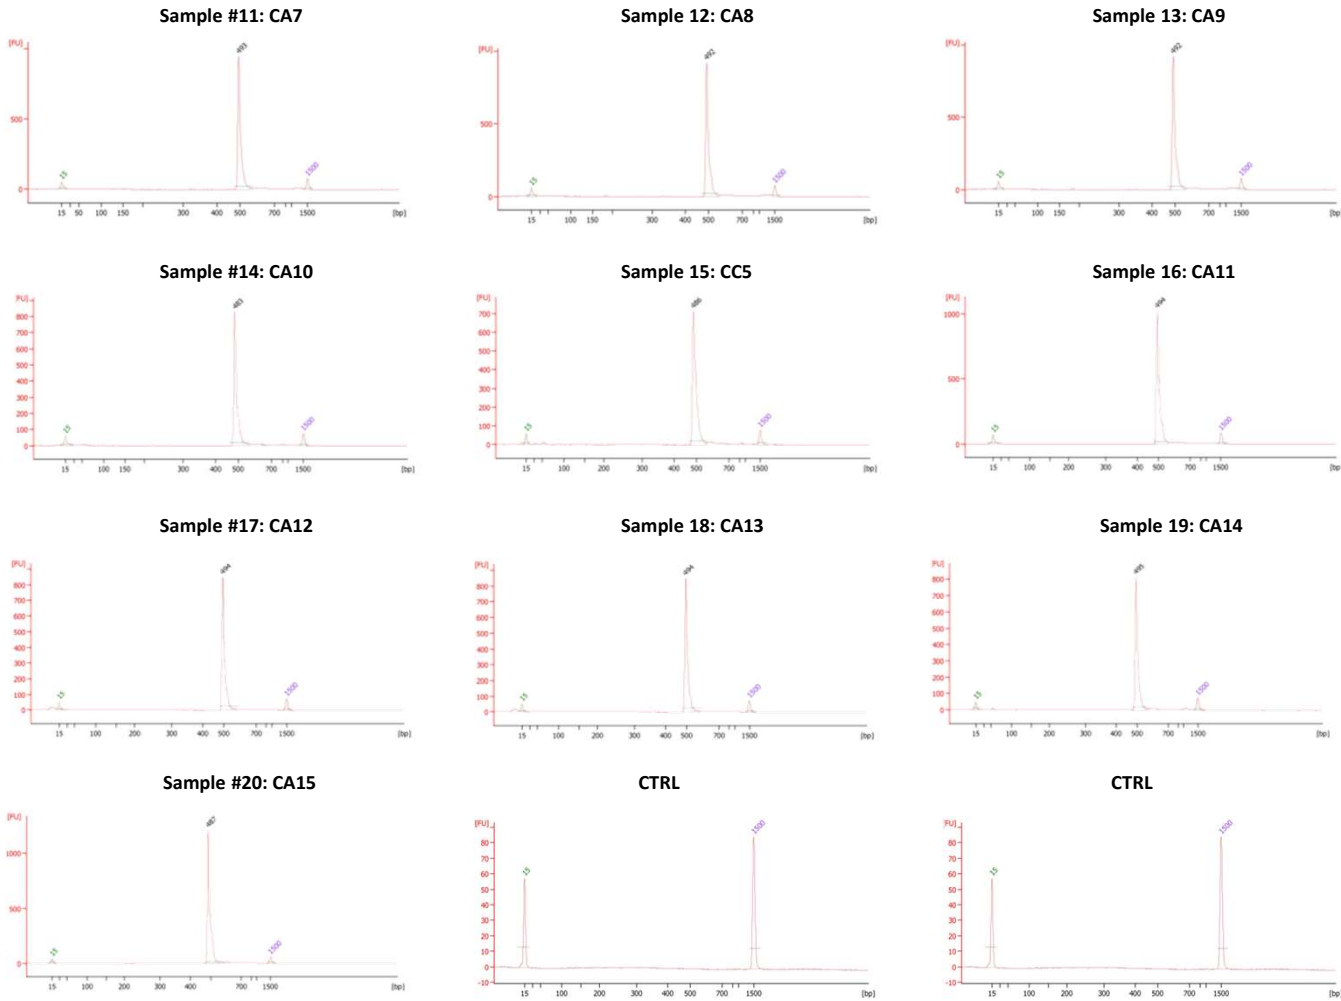

Assay Class: DNA 1000  
Data Path: C:\...-30\2100\_expert\_DNA 1000\_DE34903611\_2023-03-06\_NTS\_11\_20.xad

Created: 3/08/2023 11:25:12 AM  
Modified: 3/08/2023 11:25:12 AM

Electrophoresis File Run Summary



Peak table for Ladder :

| Peak | Size [bp] | Conc. [ng/μl] | Molarity [nmol/l] | Observations |
|------|-----------|---------------|-------------------|--------------|
| 1    | 15        | 4.20          | 4.4.2             | Lower Marker |
| 2    | 25        | 4.00          | 242.4             | Ladder Peak  |
| 3    | 50        | 4.00          | 121.2             | Ladder Peak  |
| 4    | 100       | 4.00          | 60.6              | Ladder Peak  |
| 5    | 150       | 4.00          | 40.3              | Ladder Peak  |
| 6    | 200       | 4.00          | 30.3              | Ladder Peak  |
| 7    | 300       | 4.00          | 20.2              | Ladder Peak  |
| 8    | 400       | 4.00          | 15.2              | Ladder Peak  |
| 9    | 500       | 4.00          | 12.1              | Ladder Peak  |
| 10   | 700       | 4.00          | 8.7               | Ladder Peak  |
| 11   | 850       | 4.00          | 7.1               | Ladder Peak  |
| 12   | 1,000     | 4.00          | 6.1               | Ladder Peak  |
| 13   | 1,500     | 2.10          | 2.1               | Upper Marker |
| 14   | 3,024     | 0.00          | 0.00              |              |
| 15   | 4,006     | 0.00          | 0.00              |              |

Assay Class: DNA 1000  
Data Path: C:\...-30\2100\_expert\_DNA 1000\_DE34903611\_2023-03-06\_NTS\_11\_20.xad

Created: 3/08/2023 11:25:12 AM  
Modified: 3/08/2023 11:25:12 AM

Electrophoresis File Run Summary

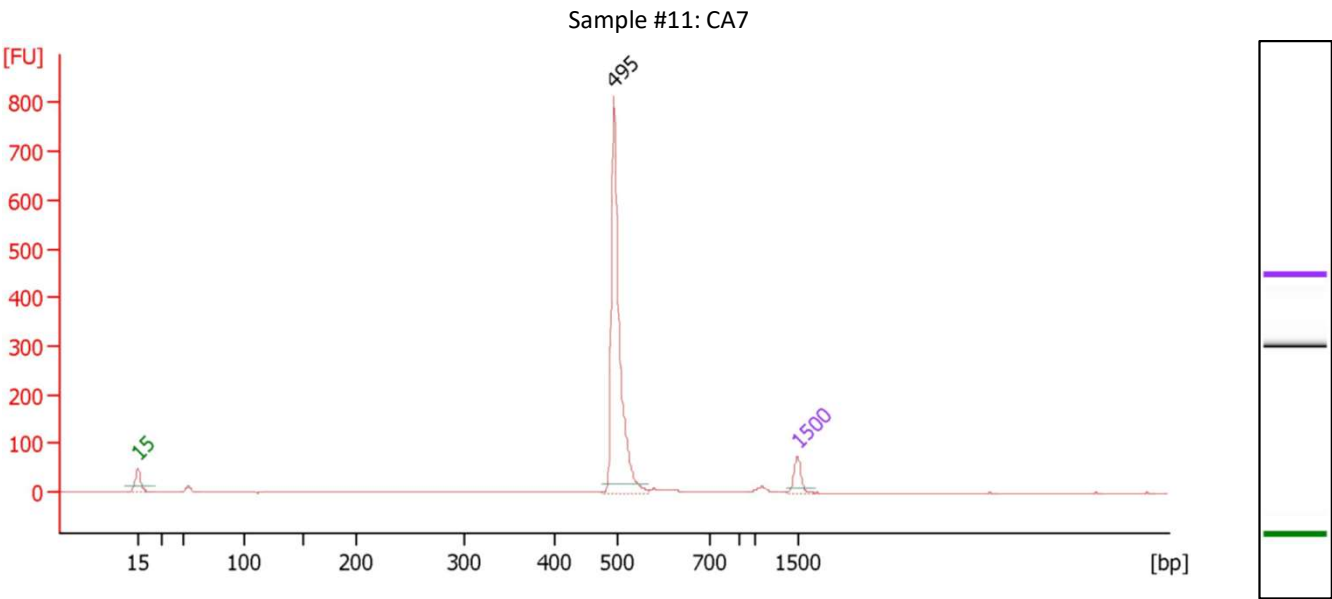

Peak table for Sample #11 :

| Peak | Size [bp] | Conc. [ng/μl] | Molarity [nmol/l] | Observations |
|------|-----------|---------------|-------------------|--------------|
| 1    | 15        | 4.20          | 424.4             | Lower Marker |
| 2    | 495       | 22.23         | 40.1              | Ladder Peak  |
| 3    | 1,500     | 2.10          | 2.1               | Upper Marker |

Assay Class: DNA 1000  
Data Path: C:\...-30\2100\_expert\_DNA 1000\_DE34903611\_2023-03-06\_NTS\_11\_20.xad

Created: 3/08/2023 11:25:12 AM  
Modified: 3/08/2023 11:25:12 AM

Electrophoresis File Run Summary

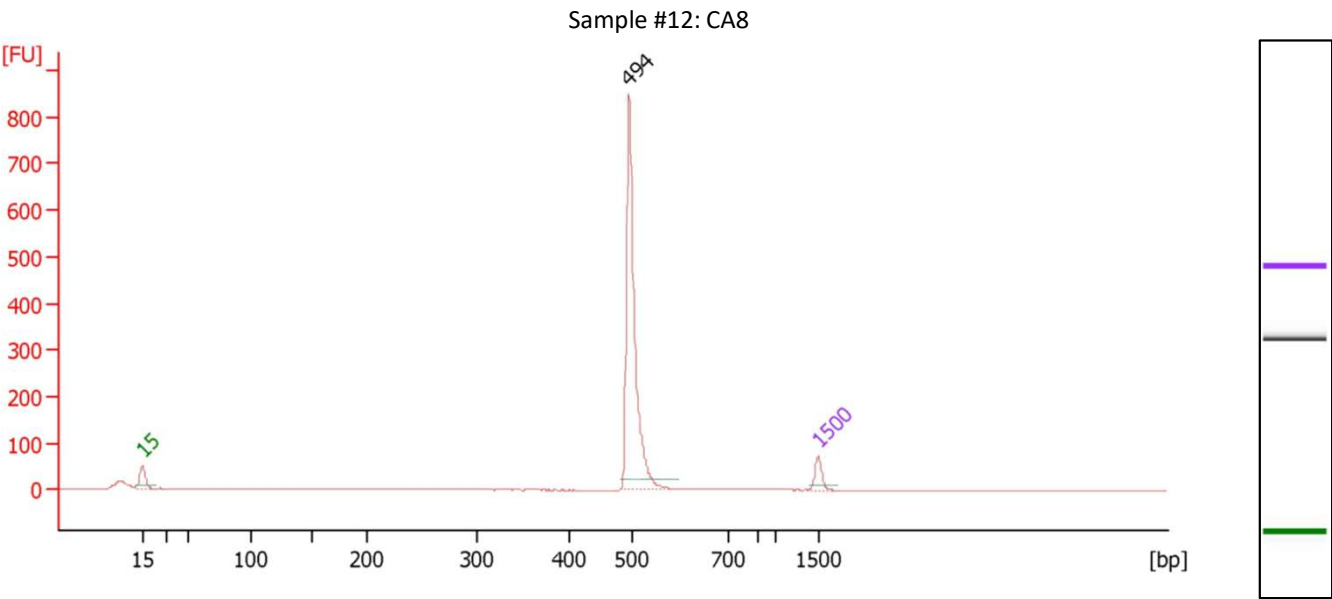

Peak table for Sample #12 :

| Peak | Size [bp] | Conc. [ng/μl] | Molarity [nmol/l] | Observations |
|------|-----------|---------------|-------------------|--------------|
| 1    | 15        | 4.20          | 424.4             | Lower Marker |
| 2    | 494       | 35.70         | 94.0              | Ladder Peak  |
| 3    | 1,500     | 2.10          | 2.2               | Upper Marker |

Assay Class: DNA 1000  
Data Path: C:\...-30\2100\_expert\_DNA 1000\_DE34903611\_2023-03-06\_NTS\_11\_20.xad

Created: 3/08/2023 11:25:12 AM  
Modified: 3/08/2023 11:25:12 AM

Electrophoresis File Run Summary

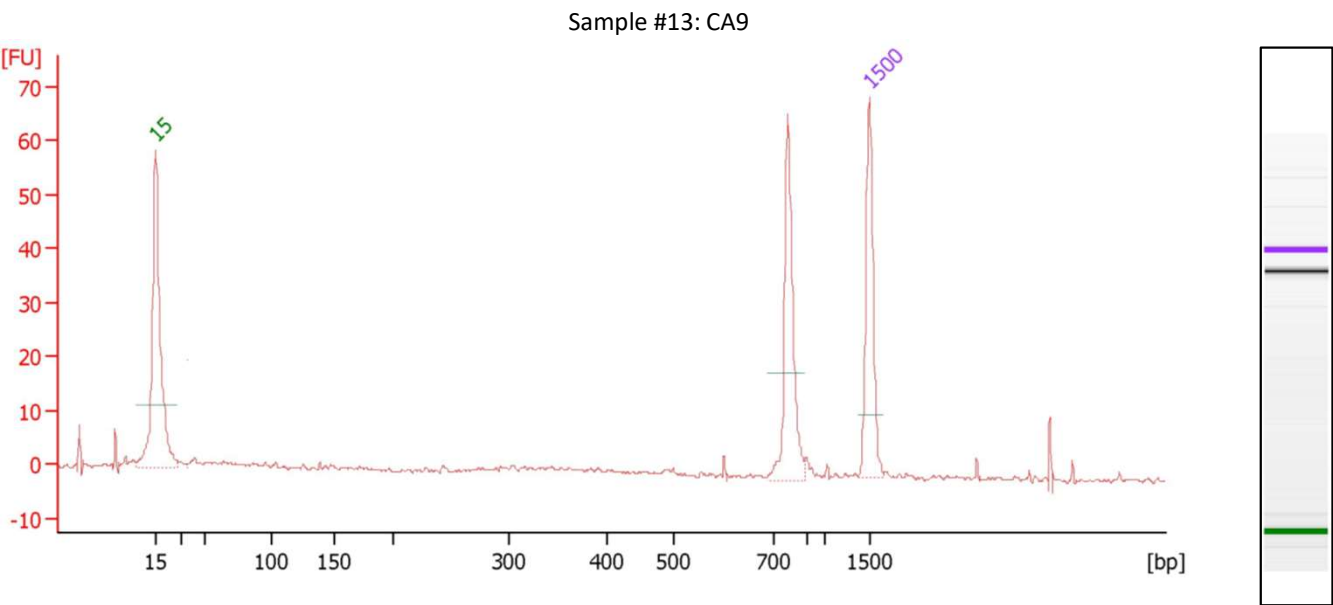

Peak table for Sample #13 :

| Peak | Size [bp] | Conc. [ng/μl] | Molarity [nmol/l] | Observations |
|------|-----------|---------------|-------------------|--------------|
| 1    | 15        | 4.20          | 424.4             | Lower Marker |
| 2    | 725       | 5.91          | 10.3              | Ladder Peak  |
| 3    | 1,500     | 2.10          | 2.1               | Upper Marker |

Assay Class: DNA 1000  
Data Path: C:\...-30\2100\_expert\_DNA 1000\_DE34903611\_2023-03-06\_NTS\_11\_20.xad

Created: 3/08/2023 11:25:12 AM  
Modified: 3/08/2023 11:25:12 AM

Electrophoresis File Run Summary

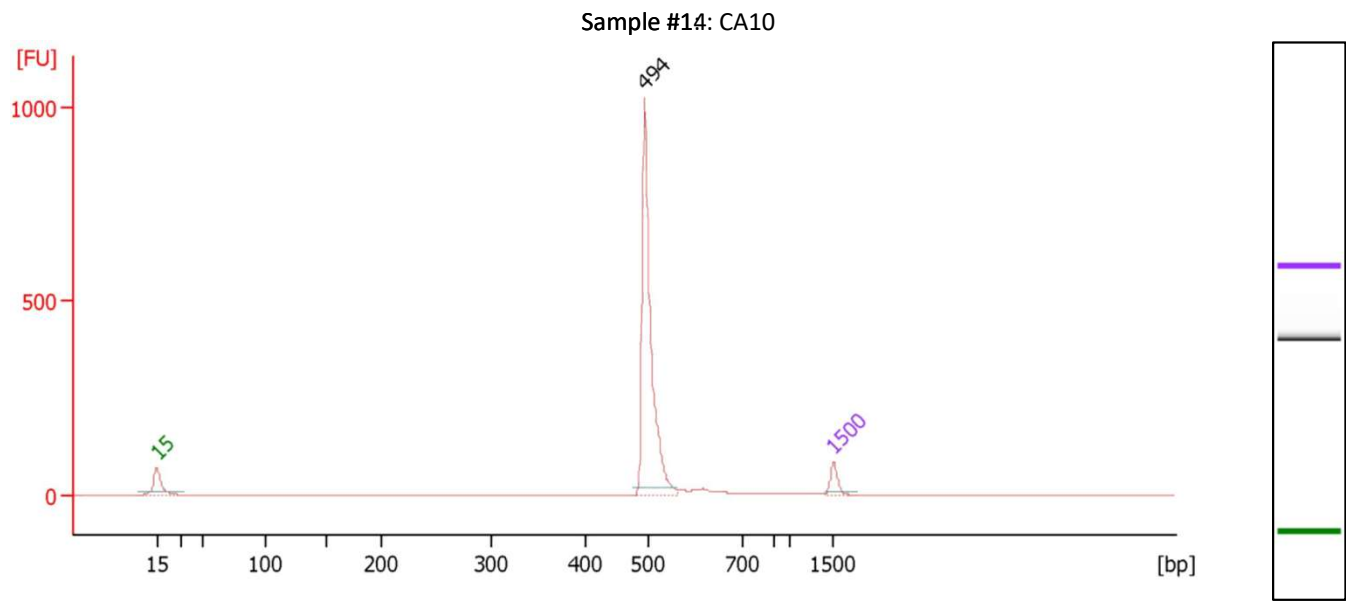

Peak table for Sample #14 :

| Peak | Size [bp] | Conc. [ng/μl] | Molarity [nmol/l] | Observations |
|------|-----------|---------------|-------------------|--------------|
| 1    | 15        | 4.20          | 424.2             | Lower Marker |
| 2    | 494       | 24.19         | 91.9              | Ladder Peak  |
| 3    | 1,500     | 2.10          | 2.1               | Upper Marker |

Assay Class: DNA 1000  
Data Path: C:\...-30\2100\_expert\_DNA 1000\_DE34903611\_2023-03-06\_NTS\_11\_20.xad

Created: 3/08/2023 11:25:12 AM  
Modified: 3/08/2023 11:25:12 AM

Electrophoresis File Run Summary

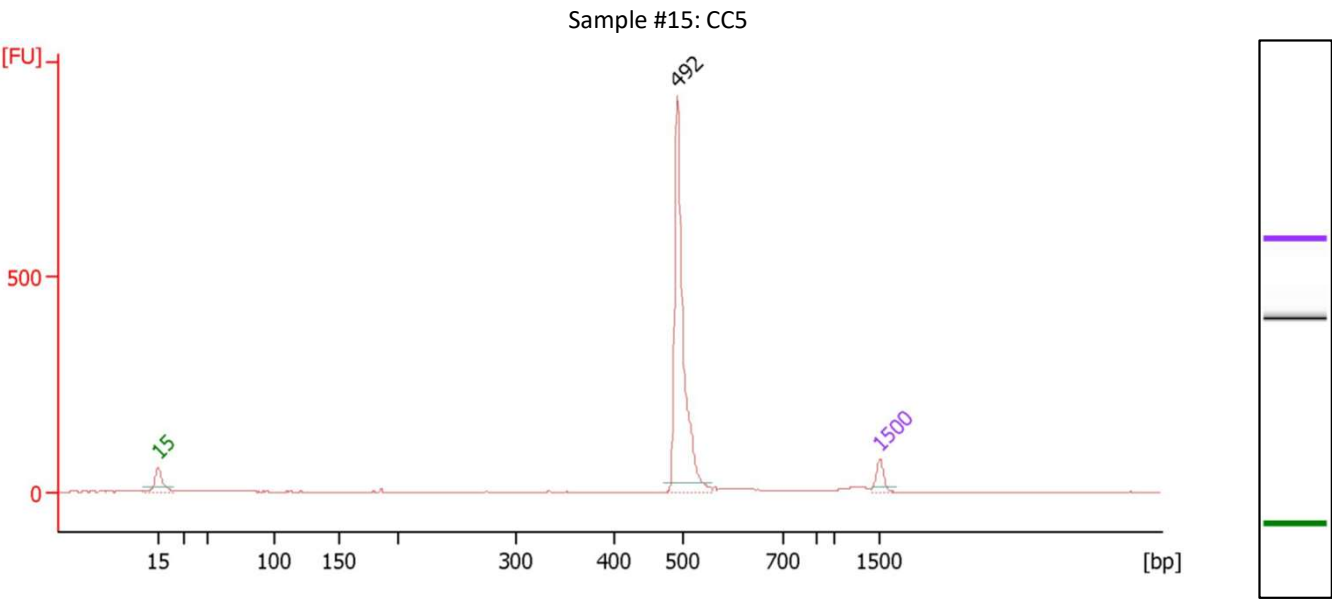

Peak table for Sample #15 :

| Peak | Size [bp] | Conc. [ng/μl] | Molarity [nmol/l] | Observations |
|------|-----------|---------------|-------------------|--------------|
| 1    | 15        | 4.20          | 424.4             | Lower Marker |
| 2    | 492       | 31.20         | 80.5              | Ladder Peak  |
| 3    | 1,500     | 2.10          | 2.2               | Upper Marker |

Assay Class: DNA 1000  
Data Path: C:\...-30\2100\_expert\_DNA 1000\_DE34903611\_2023-03-06\_NTS\_11\_20.xad

Created: 3/08/2023 11:25:12 AM  
Modified: 3/08/2023 11:25:12 AM

Electrophoresis File Run Summary

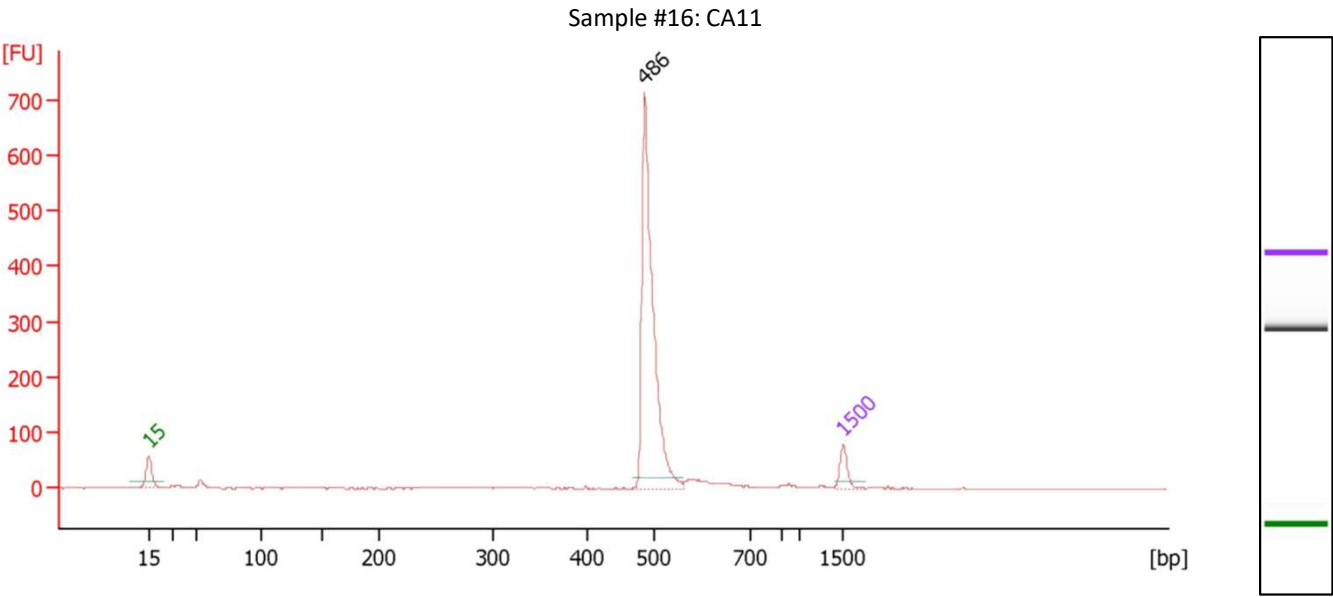

Peak table for Sample #16 :

| Peak | Size [bp] | Conc. [ng/μl] | Molarity [nmol/l] | Observations |
|------|-----------|---------------|-------------------|--------------|
| 1    | 15        | 4.21          | 424.4             | Lower Marker |
| 2    | 486       | 36.32         | 112.74            | Ladder Peak  |
| 3    | 1,500     | 2.12          | 2.2               | Upper Marker |

Assay Class: DNA 1000  
Data Path: C:\...-30\2100 expert\_DNA 1000\_DE34903611\_2023-03-06\_NTS\_11\_20.xad

Created: 3/08/2023 11:25:12 AM  
Modified: 3/08/2023 11:25:12 AM

Electrophoresis File Run Summary

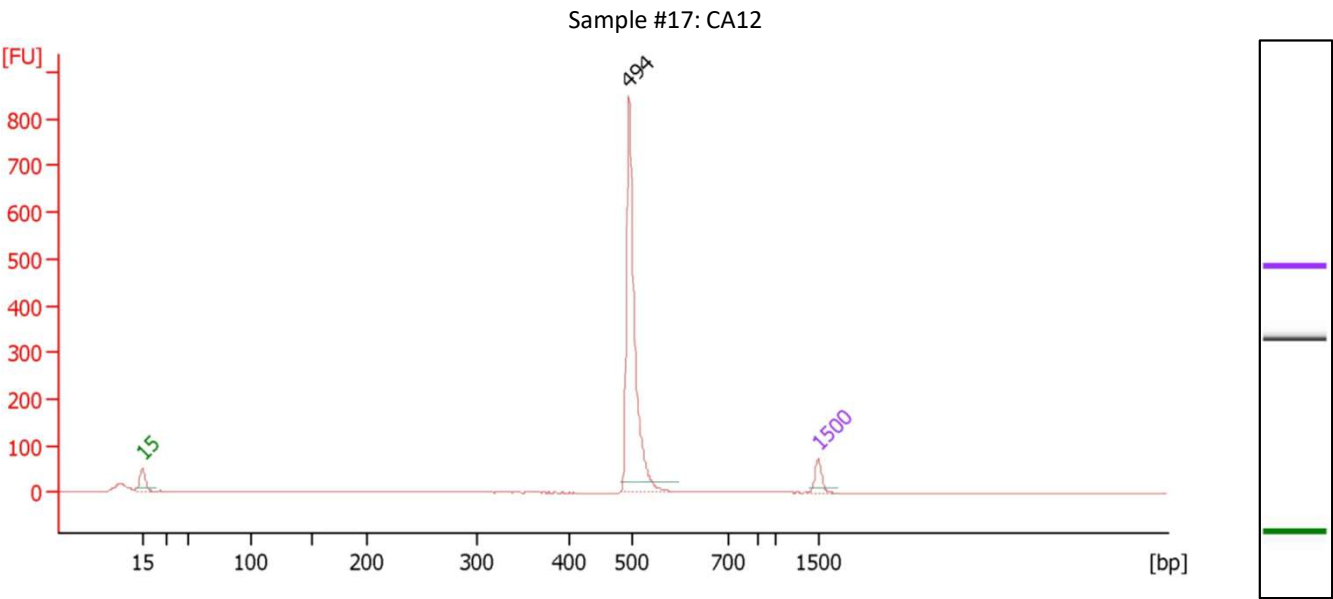

Peak table for Sample #17 :

| Peak | Size [bp] | Conc. [ng/μl] | Molarity [nmol/l] | Observations |
|------|-----------|---------------|-------------------|--------------|
| 1    | 15        | 4.20          | 424.4             | Lower Marker |
| 2    | 494       | 33.85         | 104.1             | Ladder Peak  |
| 3    | 1,500     | 2.10          | 2.2               | Upper Marker |

Assay Class: DNA 1000  
Data Path: C:\...-30\2100\_expert\_DNA 1000\_DE34903611\_2023-03-06\_NTS\_11\_20.xad

Created: 3/08/2023 11:25:12 AM  
Modified: 3/08/2023 11:25:12 AM

Electrophoresis File Run Summary

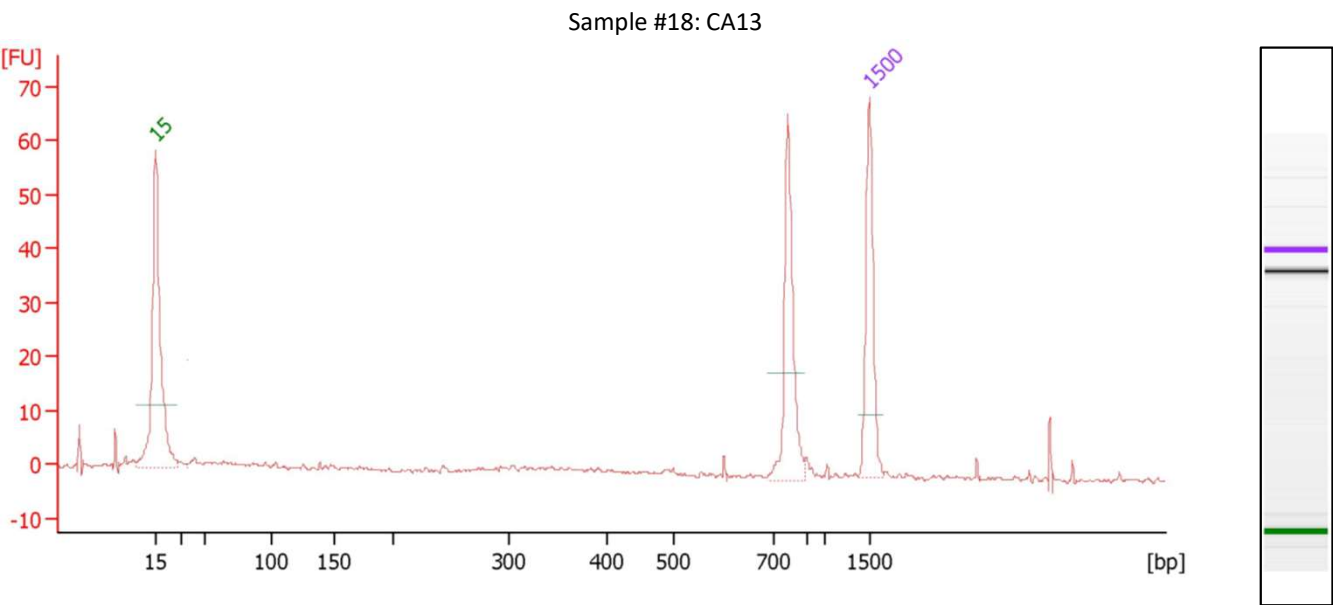

Peak table for Sample #18 :

| Peak | Size [bp] | Conc. [ng/μl] | Molarity [nmol/l] | Observations |
|------|-----------|---------------|-------------------|--------------|
| 1    | 15        | 4.20          | 424.4             | Lower Marker |
| 2    | 725       | 35.91         | 110.3             | Ladder Peak  |
| 3    | 1,500     | 2.10          | 2.1               | Upper Marker |

Assay Class: DNA 1000  
Data Path: C:\...-30\2100 expert\_DNA 1000\_DE34903611\_2023-03-06\_NTS\_11\_20.xad

Created: 3/08/2023 11:25:12 AM  
Modified: 3/08/2023 11:25:12 AM

Electrophoresis File Run Summary

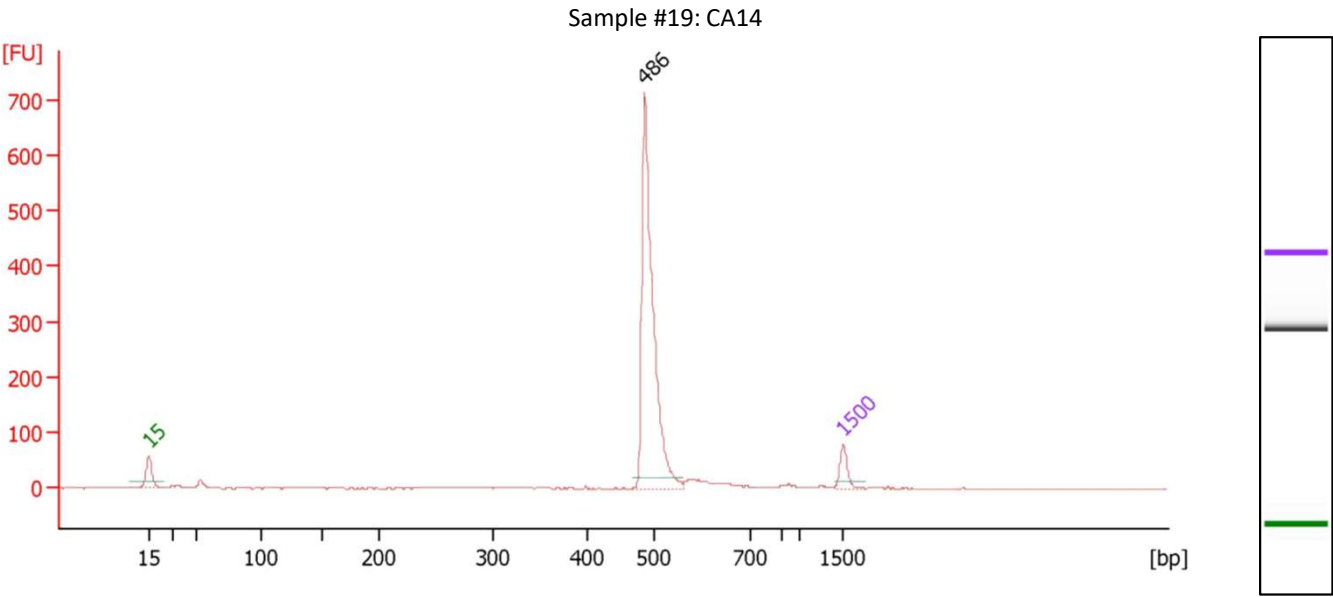

Peak table for Sample #19 :

| Peak | Size [bp] | Conc. [ng/μl] | Molarity [nmol/l] | Observations |
|------|-----------|---------------|-------------------|--------------|
| 1    | 15        | 4.20          | 424.2             | Lower Marker |
| 2    | 486       | 30.21         | 60.2              | Ladder Peak  |
| 3    | 1,500     | 2.10          | 2.1               | Upper Marker |

Assay Class: DNA 1000  
Data Path: C:\...-30\2100\_expert\_DNA 1000\_DE34903611\_2023-03-06\_NTS\_11\_20.xad

Created: 3/08/2023 11:25:12 AM  
Modified: 3/08/2023 11:25:12 AM

Electrophoresis File Run Summary

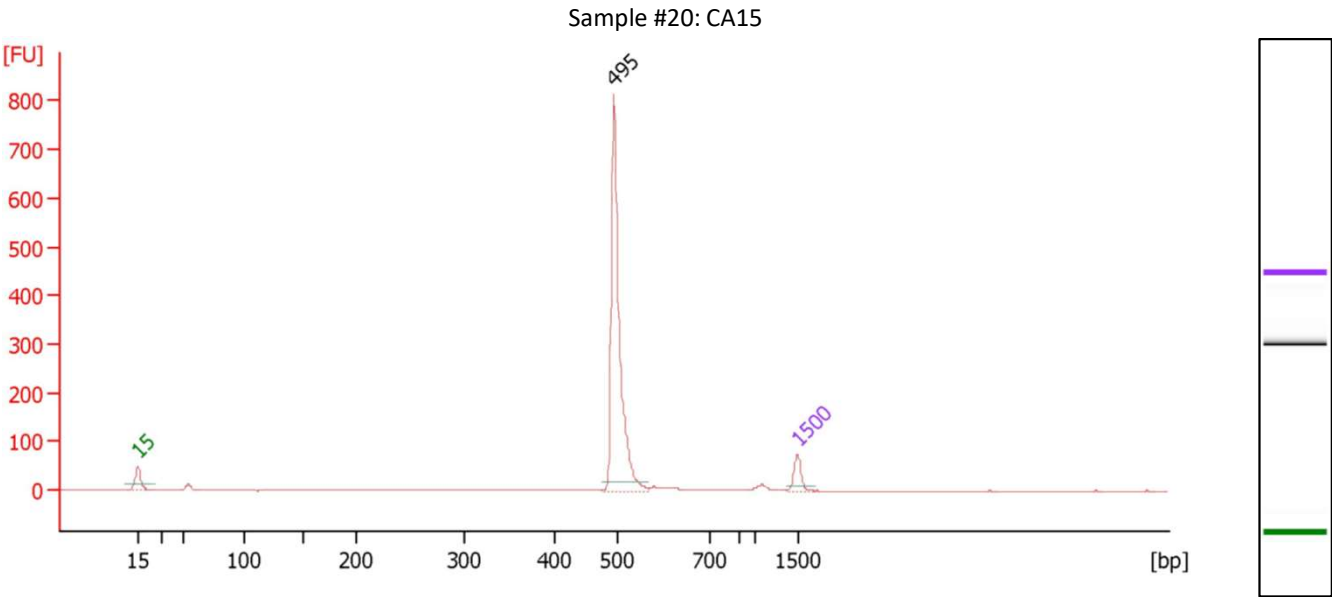

Peak table for Sample #20 :

| Peak | Size [bp] | Conc. [ng/μl] | Molarity [nmol/l] | Observations |
|------|-----------|---------------|-------------------|--------------|
| 1    | 15        | 4.20          | 424.4             | Lower Marker |
| 2    | 495       | 22.23         | 40.1              | Ladder Peak  |
| 3    | 1,500     | 2.10          | 2.1               | Upper Marker |

Assay Class: DNA 1000  
Data Path: C:\...-30\2100 expert\_DNA 1000\_DE34903611\_2023-03-06\_NTS\_11\_20.xad

Created: 3/08/2023 11:25:12 AM  
Modified: 3/08/2023 11:25:12 AM

Electrophoresis File Run Summary



Peak table for Sample CTRL :

| Peak | Size [bp] | Conc. [ng/μl] | Molarity [nmol/l] | Observations |
|------|-----------|---------------|-------------------|--------------|
| 1    | 15        | 4.20          | 424.4             | Lower Marker |
| 2    | 1,500     | 2.10          | 2.2               | Upper Marker |

Assay Class: DNA 1000  
Data Path: C:\...-30\2100\_expert\_DNA 1000\_DE34903611\_2023-03-06\_NTS\_11\_20.xad

Created: 3/08/2023 11:25:12 AM  
Modified: 3/08/2023 11:25:12 AM

Electrophoresis File Run Summary

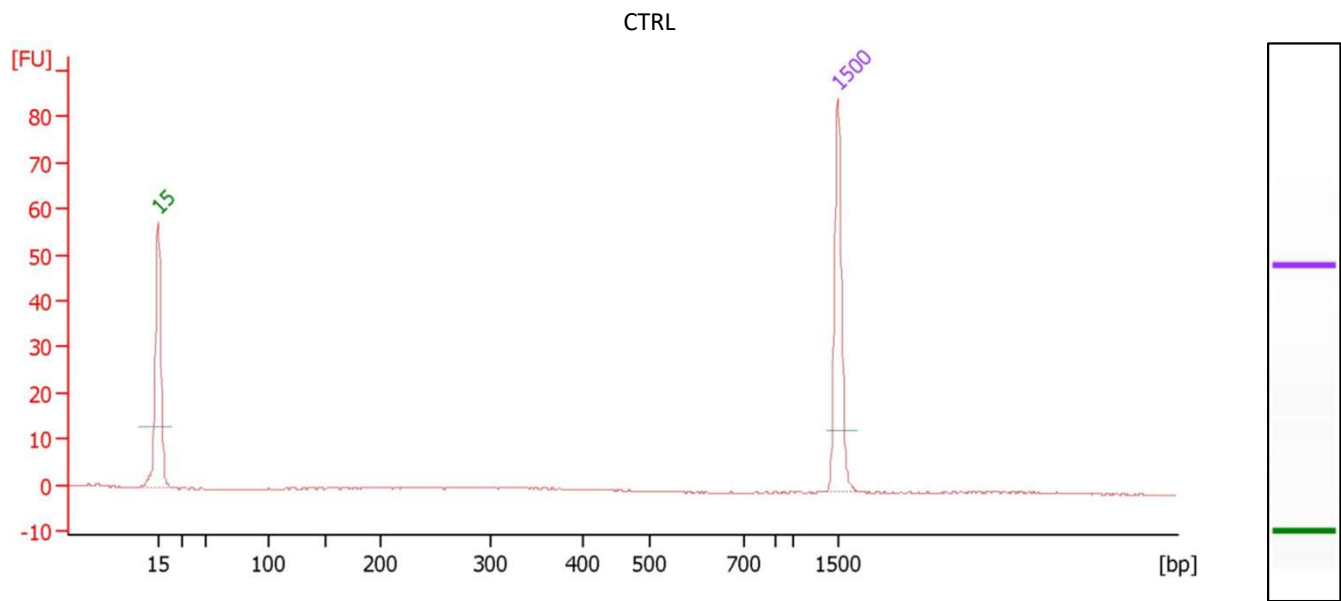

Peak table for Sample CTRL :

| Peak | Size [bp] | Conc. [ng/μl] | Molarity [nmol/l] | Observations |
|------|-----------|---------------|-------------------|--------------|
| 1    | 15        | 4.20          | 424.4             | Lower Marker |
| 2    | 1,500     | 2.10          | 2.1               | Upper Marker |

Assay Class: DNA 1000  
Data Path: C:\...-30\2100\_expert\_DNA 1000\_DE34903611\_2023-03-06\_NTS\_11\_20.xad

Created: 3/08/2023 11:25:12 AM  
Modified: 3/08/2023 11:25:12 AM

Curves

Standard Curve



Assay Class: DNA 1000  
Data Path: C:\...-30\2100\_expert\_DNA 1000\_DE34903611\_2023-03-06\_NTS\_11\_20.xad

Created: 3/08/2023 11:25:12 AM  
Modified: 3/08/2023 11:25:12 AM

Electrophoresis File Run Summary (Chip Summary)

| Sample Name | Sample Content | Rest. Digest             | Status | Observation | Result Label | Result Color |
|-------------|----------------|--------------------------|--------|-------------|--------------|--------------|
| Sample #1   |                | <input type="checkbox"/> | ✓      |             |              |              |
| Sample #2   |                | <input type="checkbox"/> | ✓      |             |              |              |
| Sample #3   |                | <input type="checkbox"/> | ✓      |             |              |              |
| Sample #4   |                | <input type="checkbox"/> | ✓      |             |              |              |
| Sample #5   |                | <input type="checkbox"/> | ✓      |             |              |              |
| Sample #6   |                | <input type="checkbox"/> | ✓      |             |              |              |
| Sample #7   |                | <input type="checkbox"/> | ✓      |             |              |              |
| Sample #8   |                | <input type="checkbox"/> | ✓      |             |              |              |
| Sample #9   |                | <input type="checkbox"/> | ✓      |             |              |              |
| Sample #10  |                | <input type="checkbox"/> | ✓      |             |              |              |
| CTRL        |                | <input type="checkbox"/> | ✓      |             |              |              |
| CTRL        |                | <input type="checkbox"/> | ✓      |             |              |              |

Chip Lot #

Reagent Kit Lot #

Chip Comments :

Assay Class: DNA 1000  
Data Path: C:\...-30\2100\_expert\_DNA\_1000\_DE34903611\_2023-03-06\_NTS\_11\_20.xad

Created: 3/08/2023 11:25:12 AM  
Modified: 3/08/2023 11:25:12 AM

Electrophoresis Assay Details

| General Analysis Settings                               | Result Label | Result Color |
|---------------------------------------------------------|--------------|--------------|
| Number of Available Sample and Ladder Wells (Max.) : 13 |              |              |
| Minimum Visible Range [s] : 30                          |              |              |
| Maximum Visible Range [s] : 129                         |              |              |
| Start Analysis Time Range [s] : 30                      |              |              |
| End Analysis Time Range [s] : 128.95                    |              |              |
| Ladder Concentration [ng/μl] : 44                       |              |              |
| Uses Standard Area for Ladder Fragments                 |              |              |
| Lower Marker Concentration [ng/μl] : 4.2                |              |              |
| Upper Marker Concentration [ng/μl] : 2.1                |              |              |
| Used Upper Marker for Quantitation                      |              |              |
| Standard Curve Fit is Point to Point                    |              |              |
| Show Data Aligned to Lower and Upper Marker             |              |              |

Integrator Settings

Integration Start Time [s] : 30  
Integration End Time [s] : 128.95  
Slope Threshold : 0.5  
Height Threshold [FU] : 20  
Area Threshold : 0.1  
Width Threshold [s] : 0.5  
Baseline Plateau [s] : 0.5

Filter Settings

Filter Width [s] : 0.5  
Polynomial Order : 4

Ladder

| Ladder Peak | Size | Area |
|-------------|------|------|
| 1           | 15   | 25   |
| 2           | 25   | 26   |
| 3           | 50   | 34   |
| 4           | 100  | 41   |
| 5           | 150  | 45   |
| 6           | 200  | 52   |
| 7           | 300  | 63   |
| 8           | 400  | 76   |
| 9           | 500  | 83   |
| 10          | 700  | 88   |
| 11          | 850  | 86   |
| 12          | 1000 | 90   |
| 13          | 1500 | 52   |

Assay Class: DNA 1000  
Data Path: C:\...-4903611\_2023-03-06\_NTS\_1\_10\_XhoI\_MseI.xad

Created: 3/14/2023 9:38:10 AM  
Modified: 3/14/2023 9:38:10 AM

Electrophoresis File Run Summary

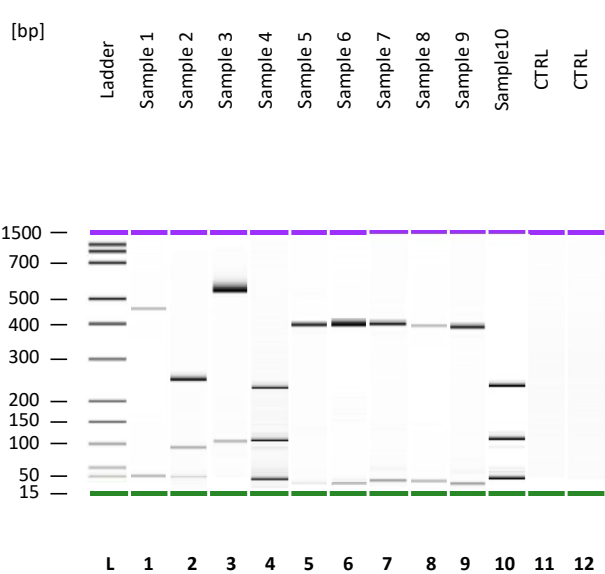

Instrument Information:

Instrument Name: DE34903611  
Serial #: DE34903611  
Firmware: C.01.069  
Type: G2938C

Assay Information:

Assay Origin Path: C:\Program Files\Agilent\2100 bioanalyzer\2100 expert\assays\dsDNA\DNA 1000 Series II.xsy  
Assay Class: DNA 1000  
Version: 2.3  
Assay Comments: DNA Analysis 2 - 1000 bp

© Copyright 2003-2009 Agilent Technologies, Inc.

Chip Information:

Chip Lot #:  
Reagent Kit Lot #:  
Chip Comments:

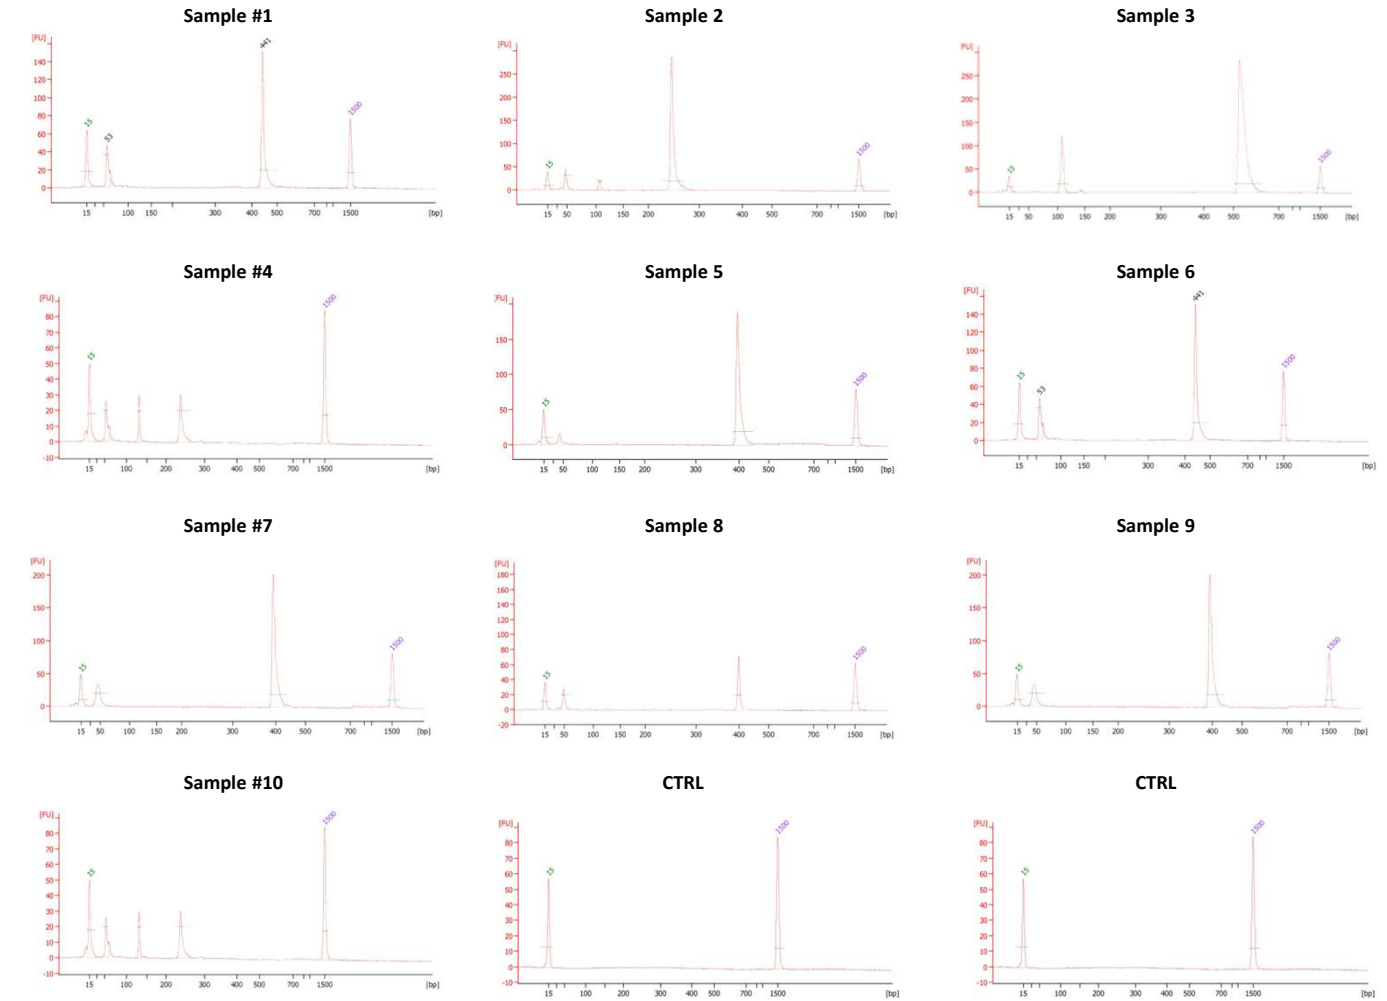

Assay Class: DNA 1000  
Data Path: C:\...-4903611\_2023-03-06\_NTS\_1\_10\_XhoI\_MseI.xad

Created: 3/14/2023 9:38:10 AM  
Modified: 3/14/2023 9:38:10 AM

Electrophoresis File Run Summary



Peak table for Ladder :

| Peak | Size [bp] | Conc. [ng/μl] | Molarity [nmol/l] | Observations |
|------|-----------|---------------|-------------------|--------------|
| 1    | 15        | 4.20          | 4.4.2             | Lower Marker |
| 2    | 25        | 4.00          | 242.4             | Ladder Peak  |
| 3    | 50        | 4.00          | 121.2             | Ladder Peak  |
| 4    | 100       | 4.00          | 60.6              | Ladder Peak  |
| 5    | 150       | 4.00          | 40.3              | Ladder Peak  |
| 6    | 200       | 4.00          | 30.3              | Ladder Peak  |
| 7    | 300       | 4.00          | 20.2              | Ladder Peak  |
| 8    | 400       | 4.00          | 15.2              | Ladder Peak  |
| 9    | 500       | 4.00          | 12.1              | Ladder Peak  |
| 10   | 700       | 4.00          | 8.7               | Ladder Peak  |
| 11   | 850       | 4.00          | 7.1               | Ladder Peak  |
| 12   | 1,000     | 4.00          | 6.1               | Ladder Peak  |
| 13   | 1,500     | 2.10          | 2.1               | Upper Marker |
| 14   | 3,024     | 0.00          | 0.00              |              |
| 15   | 4,006     | 0.00          | 0.00              |              |

Assay Class: DNA 1000  
Data Path: C:\...-4903611\_2023-03-06\_NTS\_1\_10\_XhoI\_MseI.xad

Created: 3/14/2023 9:38:10 AM  
Modified: 3/14/2023 9:38:10 AM

Electrophoresis File Run Summary

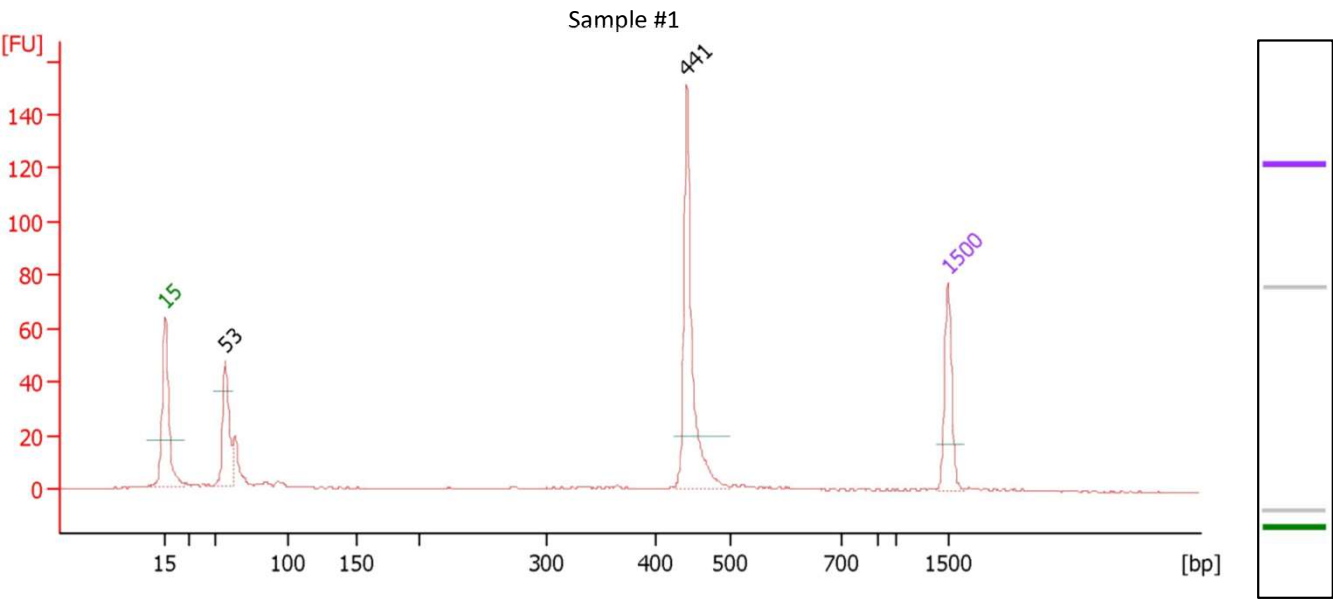

Peak table for Sample #1 :

| Peak | Size [bp] | Conc. [ng/μl] | Molarity [nmol/l] | Observations |
|------|-----------|---------------|-------------------|--------------|
| 1    | 15        | 4.20          | 424.4             | Lower Marker |
| 2    | 53        | 13.97         | 84.22             | Ladder Peak  |
| 3    | 441       | 27.25         | 91.33             | Ladder Peak  |
| 4    | 1,500     | 2.10          | 2.2               | Upper Marker |

Assay Class: DNA 1000  
Data Path: C:\...-4903611\_2023-03-06\_NTS\_1\_10\_XhoI\_MseI.xad

Created: 3/14/2023 9:38:10 AM  
Modified: 3/14/2023 9:38:10 AM

Electrophoresis File Run Summary

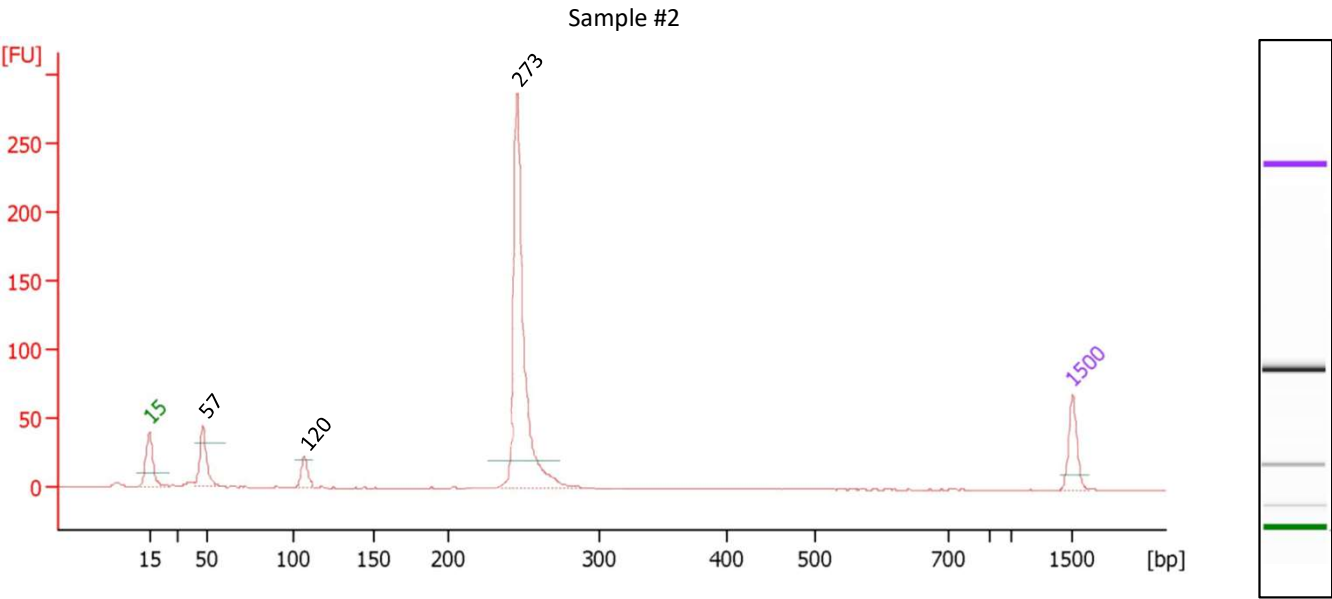

Peak table for Sample #2 :

| Peak | Size [bp] | Conc. [ng/μl] | Molarity [nmol/l] | Observations |
|------|-----------|---------------|-------------------|--------------|
| 1    | 15        | 4.20          | 424.4             | Lower Marker |
| 2    | 57        | 3.21          | 84.12             | Ladder Peak  |
| 3    | 120       | 2.23          | 87.22             | Ladder Peak  |
| 4    | 273       | 31.25         | 95.36             | Ladder Peak  |
| 5    | 1,500     | 2.10          | 2.2               | Upper Marker |

Assay Class: DNA 1000  
Data Path: C:\...-4903611\_2023-03-06\_NTS\_1\_10\_XhoI\_MseI.xad

Created: 3/14/2023 9:38:10 AM  
Modified: 3/14/2023 9:38:10 AM

Electrophoresis File Run Summary

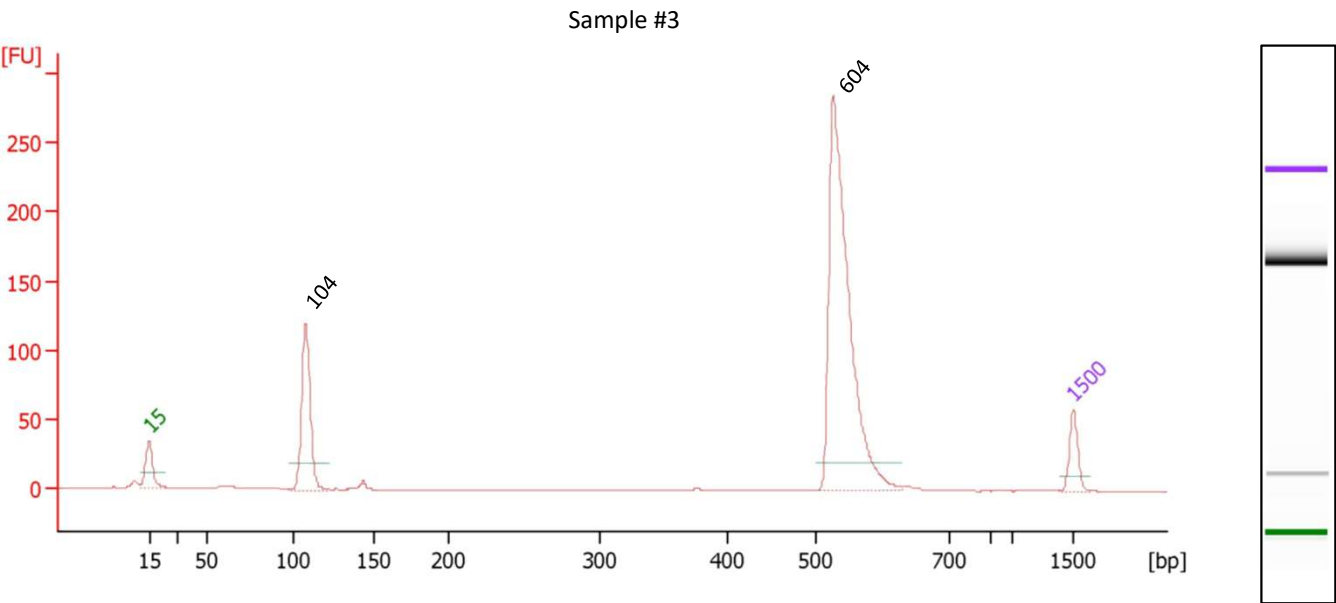

Assay Class: DNA 1000  
Data Path: C:\...-4903611\_2023-03-06\_NTS\_1\_10\_XhoI\_MseI.xad

Created: 3/14/2023 9:38:10 AM  
Modified: 3/14/2023 9:38:10 AM

Electrophoresis File Run Summary

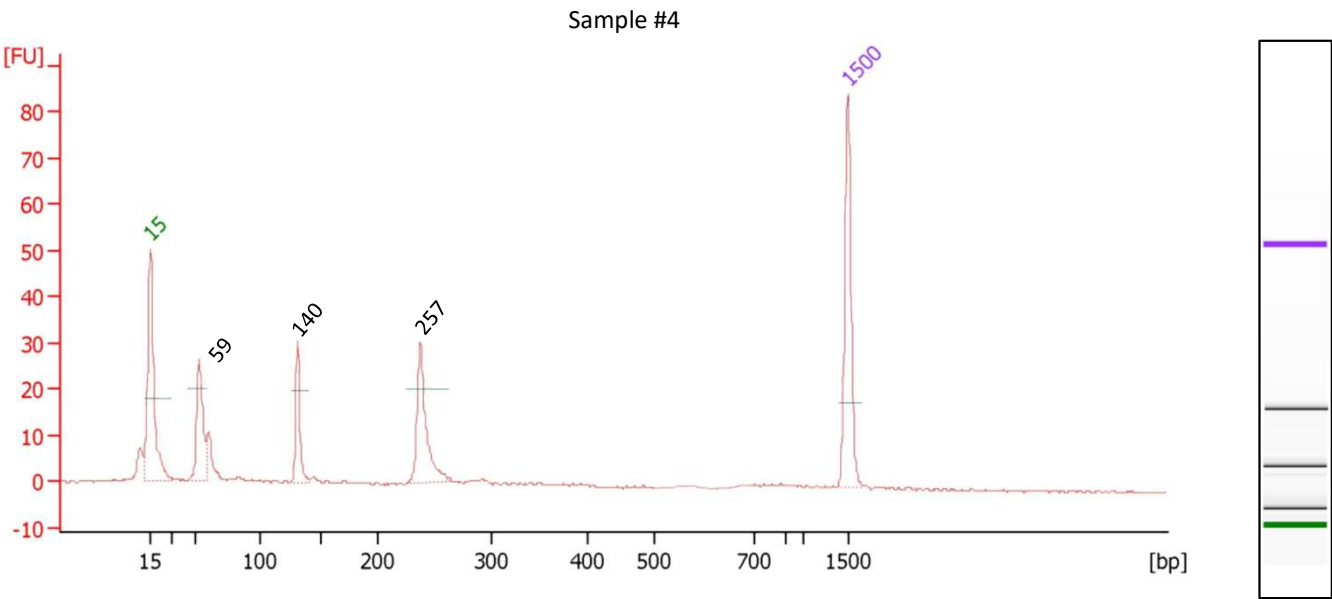

Peak table for Sample #4 :

| Peak | Size [bp] | Conc. [ng/μl] | Molarity [nmol/l] | Observations |
|------|-----------|---------------|-------------------|--------------|
| 1    | 15        | 4.20          | 424.2             | Lower Marker |
| 2    | 59        | 8.98          | 31.87             | Ladder Peak  |
| 3    | 140       | 7.85          | 30.69             | Ladder Peak  |
| 4    | 257       | 29.99         | 105.69            | Ladder Peak  |
| 5    | 1,500     | 2.10          | 2.1               | Upper Marker |

Assay Class: DNA 1000  
Data Path: C:\...-4903611\_2023-03-06\_NTS\_1\_10\_XhoI\_MseI.xad

Created: 3/14/2023 9:38:10 AM  
Modified: 3/14/2023 9:38:10 AM

Electrophoresis File Run Summary

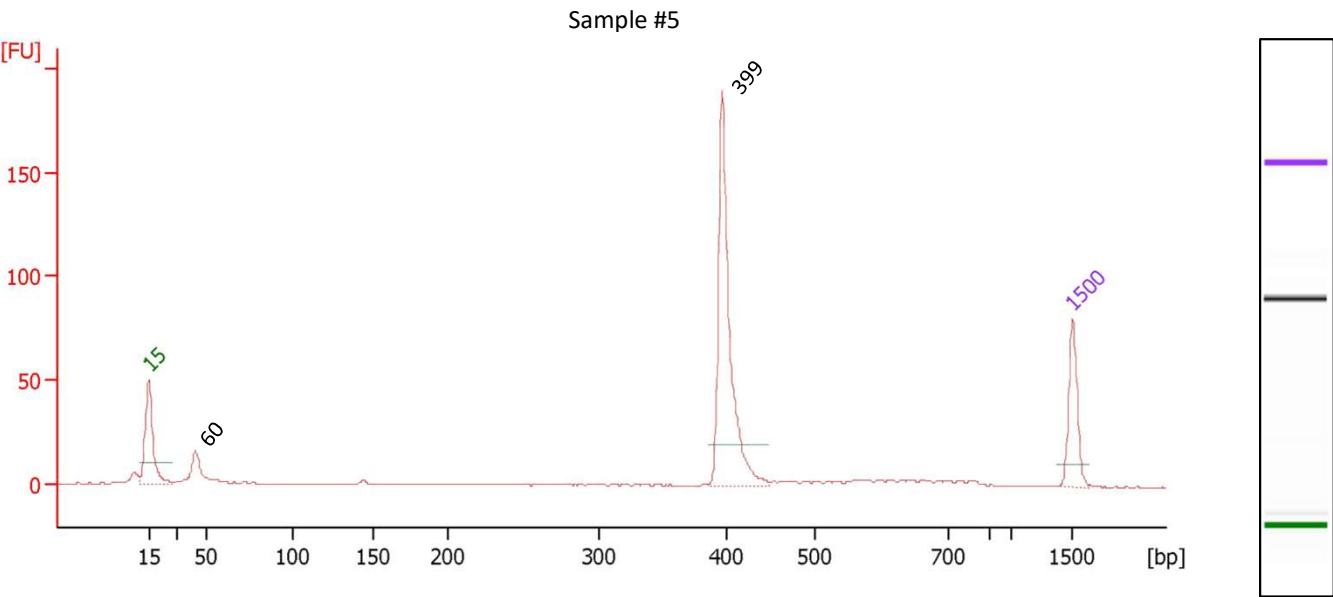

Peak table for Sample #5 :

| Peak | Size [bp] | Conc. [ng/μl] | Molarity [nmol/l] | Observations |
|------|-----------|---------------|-------------------|--------------|
| 1    | 15        | 4.20          | 424.2             | Lower Marker |
| 2    | 60        | 1.25          | 25.6              | Ladder Peak  |
| 3    | 399       | 25.34         | 112.3             | Ladder Peak  |
| 4    | 1,500     | 2.10          | 2.1               | Upper Marker |

Assay Class: DNA 1000  
Data Path: C:\...-4903611\_2023-03-06\_NTS\_1\_10\_XhoI\_MseI.xad

Created: 3/14/2023 9:38:10 AM  
Modified: 3/14/2023 9:38:10 AM

Electrophoresis File Run Summary

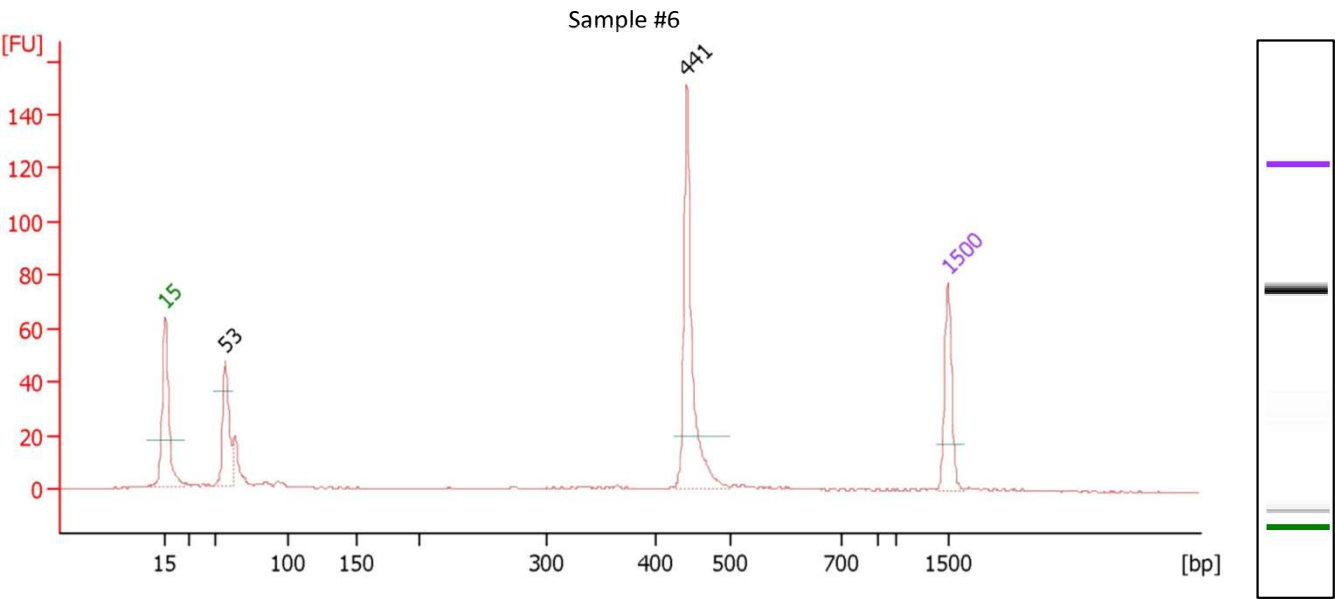

Peak table for Sample #6 :

| Peak | Size [bp] | Conc. [ng/μl] | Molarity [nmol/l] | Observations |
|------|-----------|---------------|-------------------|--------------|
| 1    | 15        | 4.20          | 424.4             | Lower Marker |
| 2    | 53        | 12.32         | 47.56             | Ladder Peak  |
| 3    | 441       | 25.96         | 84.52             | Ladder Peak  |
| 4    | 1,500     | 2.10          | 2.2               | Upper Marker |

Assay Class: DNA 1000  
Data Path: C:\...-4903611\_2023-03-06\_NTS\_1\_10\_XhoI\_MseI.xad

Created: 3/14/2023 9:38:10 AM  
Modified: 3/14/2023 9:38:10 AM

Electrophoresis File Run Summary

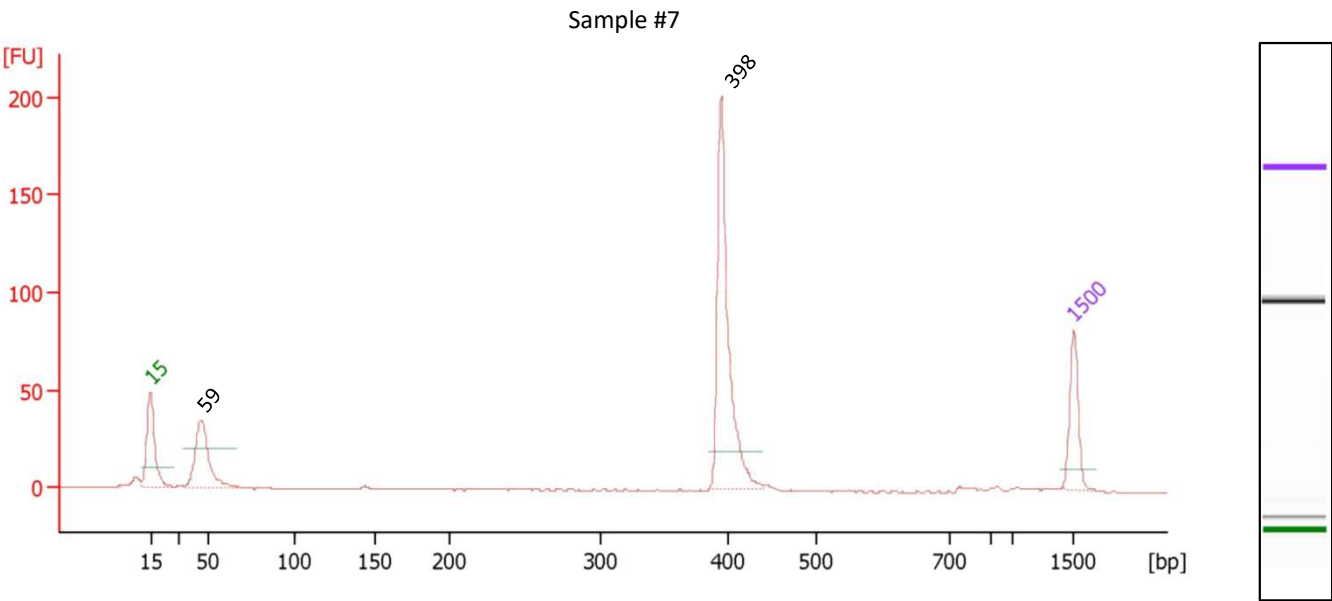

Peak table for Sample #7 :

| Peak | Size [bp] | Conc. [ng/μl] | Molarity [nmol/l] | Observations |
|------|-----------|---------------|-------------------|--------------|
| 1    | 15        | 4.20          | 424.2             | Lower Marker |
| 2    | 59        | 3.58          | 32.9              | Ladder Peak  |
| 3    | 398       | 36.87         | 121.2             | Ladder Peak  |
| 4    | 1,500     | 2.10          | 2.1               | Upper Marker |

Assay Class: DNA 1000  
Data Path: C:\...-4903611\_2023-03-06\_NTS\_1\_10\_XhoI\_MseI.xad

Created: 3/14/2023 9:38:10 AM  
Modified: 3/14/2023 9:38:10 AM

Electrophoresis File Run Summary

Sample #8

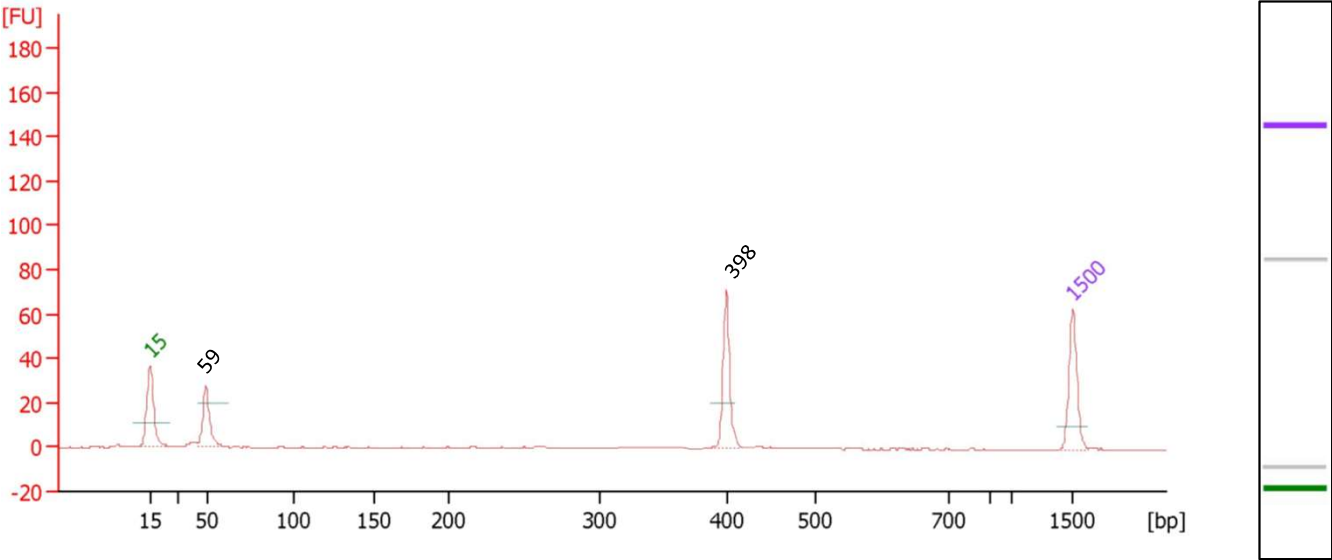

Peak table for Sample #8 :

| Peak | Size [bp] | Conc. [ng/μl] | Molarity [nmol/l] | Observations |
|------|-----------|---------------|-------------------|--------------|
| 1    | 15        | 4.20          | 424.4             | Lower Marker |
| 2    | 59        | 5.58          | 54.8              | Ladder Peak  |
| 3    | 398       | 7.85          | 42.1              | Ladder Peak  |
| 4    | 1,500     | 2.10          | 2.2               | Upper Marker |

Assay Class: DNA 1000  
Data Path: C:\...-4903611\_2023-03-06\_NTS\_1\_10\_XhoI\_MseI.xad

Created: 3/14/2023 9:38:10 AM  
Modified: 3/14/2023 9:38:10 AM

Electrophoresis File Run Summary

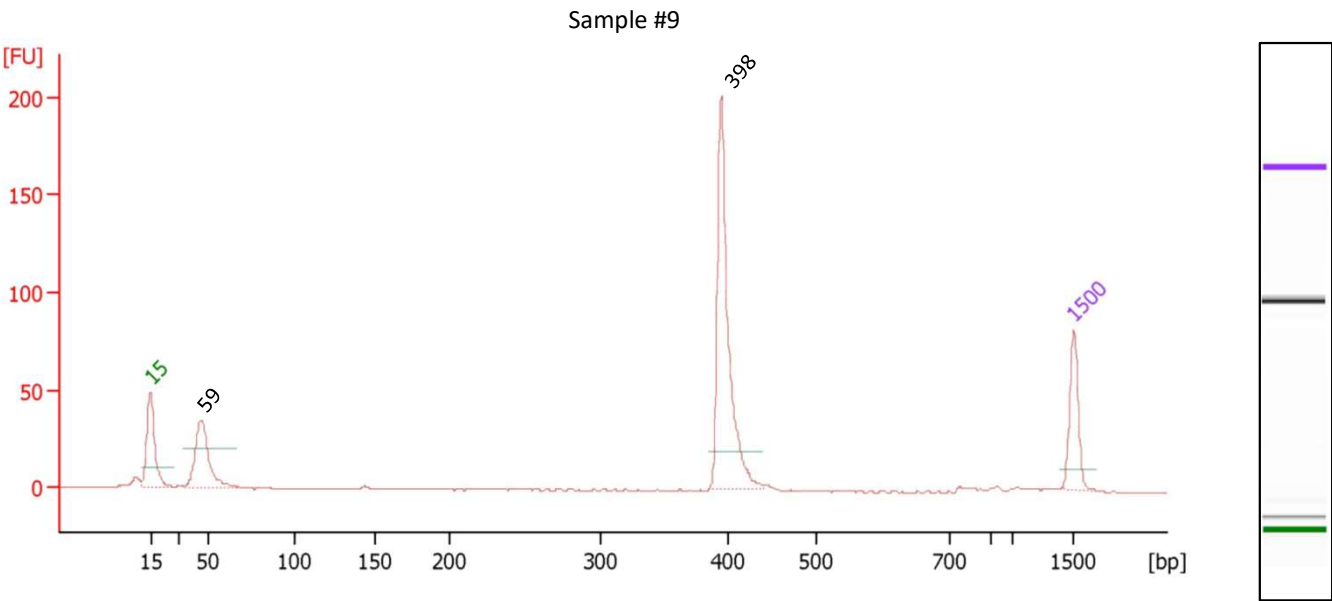

Peak table for Sample #9 :

| Peak | Size [bp] | Conc. [ng/μl] | Molarity [nmol/l] | Observations |
|------|-----------|---------------|-------------------|--------------|
| 1    | 15        | 4.20          | 424.2             | Lower Marker |
| 2    | 59        | 3.58          | 32.9              | Ladder Peak  |
| 3    | 398       | 36.87         | 121.2             | Ladder Peak  |
| 4    | 1,500     | 2.10          | 2.1               | Upper Marker |

Assay Class: DNA 1000  
Data Path: C:\...-4903611\_2023-03-06\_NTS\_1\_10\_XhoI\_MseI.xad

Created: 3/14/2023 9:38:10 AM  
Modified: 3/14/2023 9:38:10 AM

Electrophoresis File Run Summary

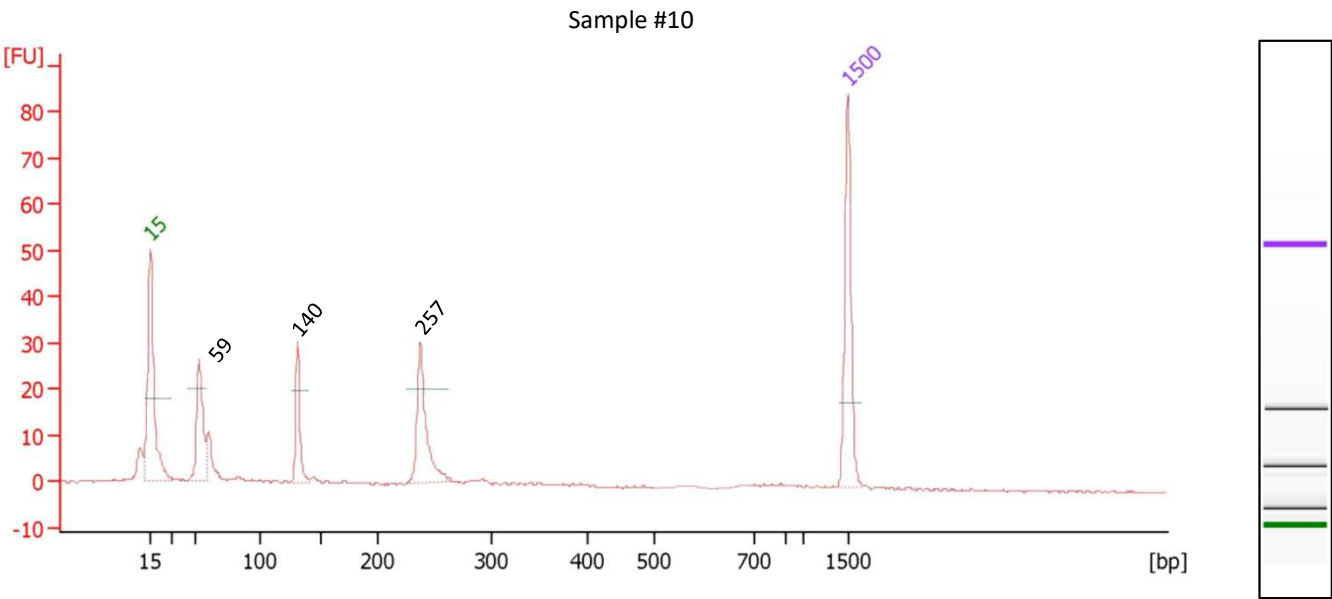

Peak table for Sample #10 :

| Peak | Size [bp] | Conc. [ng/μl] | Molarity [nmol/l] | Observations |
|------|-----------|---------------|-------------------|--------------|
| 1    | 15        | 4.20          | 424.2             | Lower Marker |
| 2    | 59        | 7.41          | 35.87             | Ladder Peak  |
| 3    | 140       | 8.44          | 33.69             | Ladder Peak  |
| 4    | 257       | 29.58         | 102.4             | Ladder Peak  |
| 5    | 1,500     | 2.10          | 2.1               | Upper Marker |

Assay Class: DNA 1000  
Data Path: C:\...-4903611\_2023-03-06\_NTS\_1\_10\_XhoI\_MseI.xad

Created: 3/14/2023 9:38:10 AM  
Modified: 3/14/2023 9:38:10 AM

Electrophoresis File Run Summary



Peak table for Sample CTRL :

| Peak | Size [bp] | Conc. [ng/μl] | Molarity [nmol/l] | Observations |
|------|-----------|---------------|-------------------|--------------|
| 1    | 15        | 4.20          | 424.4             | Lower Marker |
| 2    | 1,500     | 2.10          | 2.2               | Upper Marker |

Assay Class: DNA 1000  
Data Path: C:\...-4903611\_2023-03-06\_NTS\_1\_10\_XhoI\_MseI.xad

Created: 3/14/2023 9:38:10 AM  
Modified: 3/14/2023 9:38:10 AM

Electrophoresis File Run Summary



Peak table for Sample CTRL :

| Peak | Size [bp] | Conc. [ng/μl] | Molarity [nmol/l] | Observations |
|------|-----------|---------------|-------------------|--------------|
| 1    | 15        | 4.20          | 424.4             | Lower Marker |
| 2    | 1,500     | 2.10          | 2.1               | Upper Marker |

Assay Class: DNA 1000  
Data Path: C:\...-4903611\_2023-03-06\_NTS\_1\_10\_XhoI\_MseI.xad

Created: 3/14/2023 9:38:10 AM  
Modified: 3/14/2023 9:38:10 AM

Curves

Standard Curve



Assay Class: DNA 1000  
Data Path: C:\...-4903611\_2023-03-06\_NTS\_1\_10\_XhoI\_MseI.xad

Created: 3/14/2023 9:38:10 AM  
Modified: 3/14/2023 9:38:10 AM

Electrophoresis File Run Summary (Chip Summary)

| Sample Name | Sample Content | Rest. Digest             | Status | Observation | Result Label | Result Color |
|-------------|----------------|--------------------------|--------|-------------|--------------|--------------|
| Sample #1   |                | <input type="checkbox"/> | ✓      |             |              |              |
| Sample #2   |                | <input type="checkbox"/> | ✓      |             |              |              |
| Sample #3   |                | <input type="checkbox"/> | ✓      |             |              |              |
| Sample #4   |                | <input type="checkbox"/> | ✓      |             |              |              |
| Sample #5   |                | <input type="checkbox"/> | ✓      |             |              |              |
| Sample #6   |                | <input type="checkbox"/> | ✓      |             |              |              |
| Sample #7   |                | <input type="checkbox"/> | ✓      |             |              |              |
| Sample #8   |                | <input type="checkbox"/> | ✓      |             |              |              |
| Sample #9   |                | <input type="checkbox"/> | ✓      |             |              |              |
| Sample #10  |                | <input type="checkbox"/> | ✓      |             |              |              |
| CTRL        |                | <input type="checkbox"/> | ✓      |             |              |              |
| CTRL        |                | <input type="checkbox"/> | ✓      |             |              |              |

Chip Lot # Reagent Kit Lot #

Chip Comments :

Assay Class: DNA 1000  
Data Path: C:\...-4903611\_2023-03-06\_NTS\_1\_10\_XhoI\_MseI.xad

Created: 3/14/2023 9:38:10 AM  
Modified: 3/14/2023 9:38:10 AM

Electrophoresis Assay Details

| General Analysis Settings                               | Result Label | Result Color |
|---------------------------------------------------------|--------------|--------------|
| Number of Available Sample and Ladder Wells (Max.) : 13 |              |              |
| Minimum Visible Range [s] : 30                          |              |              |
| Maximum Visible Range [s] : 129                         |              |              |
| Start Analysis Time Range [s] : 30                      |              |              |
| End Analysis Time Range [s] : 128.95                    |              |              |
| Ladder Concentration [ng/μl] : 44                       |              |              |
| Uses Standard Area for Ladder Fragments                 |              |              |
| Lower Marker Concentration [ng/μl] : 4.2                |              |              |
| Upper Marker Concentration [ng/μl] : 2.1                |              |              |
| Used Upper Marker for Quantitation                      |              |              |
| Standard Curve Fit is Point to Point                    |              |              |
| Show Data Aligned to Lower and Upper Marker             |              |              |

Integrator Settings

Integration Start Time [s] : 30  
Integration End Time [s] : 128.95  
Slope Threshold : 0.5  
Height Threshold [FU] : 20  
Area Threshold : 0.1  
Width Threshold [s] : 0.5  
Baseline Plateau [s] : 0.5

Filter Settings

Filter Width [s] : 0.5  
Polynomial Order : 4

Ladder

| Ladder Peak | Size | Area |
|-------------|------|------|
| 1           | 15   | 25   |
| 2           | 25   | 26   |
| 3           | 50   | 34   |
| 4           | 100  | 41   |
| 5           | 150  | 45   |
| 6           | 200  | 52   |
| 7           | 300  | 63   |
| 8           | 400  | 76   |
| 9           | 500  | 83   |
| 10          | 700  | 88   |
| 11          | 850  | 86   |
| 12          | 1000 | 90   |
| 13          | 1500 | 52   |

Assay Class: DNA 1000  
Data Path: C:\...-4903611\_2023-03-06\_NTS\_11\_20\_XhoI\_MseI.xad  
**Electrophoresis File Run Summary**

Created: 3/14/2023 13:38:45 PM  
Modified: 3/14/2023 13:38:45 PM

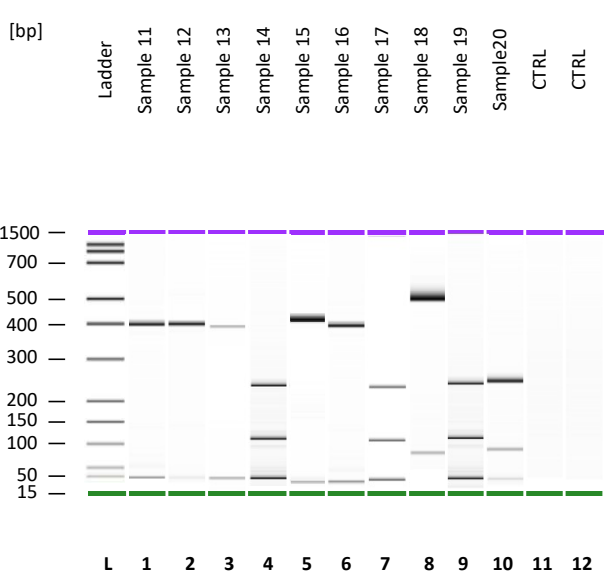

**Instrument Information:**  
Instrument Name: DE34903611      Firmware: C.01.069  
Serial #: DE34903611      Type: G2938C  
**Assay Information:**  
Assay Origin Path: C:\Program Files\Agilent\2100 bioanalyzer\2100 expert\assays\dsDNA\DNA 1000 Series II.xsy  
Assay Class: DNA 1000  
Version: 2.3  
Assay Comments: DNA Analysis 2 - 1000 bp  
© Copyright 2003-2009 Agilent Technologies, Inc.  
**Chip Information:**  
Chip Lot #:  
Reagent Kit Lot #:  
Chip Comments:

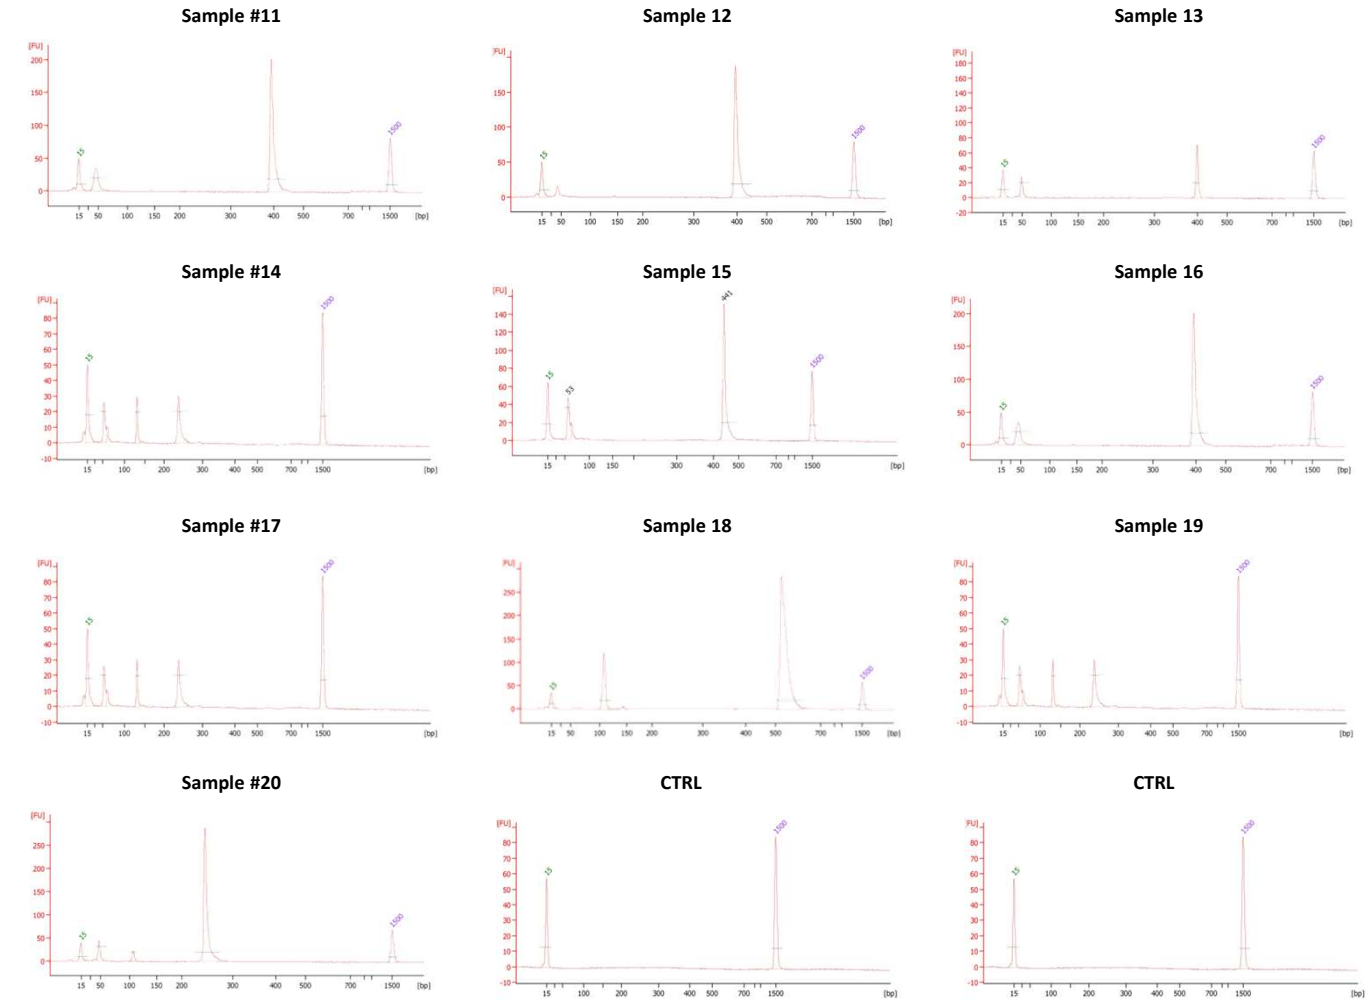

Assay Class: DNA 1000  
Data Path: C:\...-4903611\_2023-03-06\_NTS\_11\_20\_XhoI\_MseI.xad

Created: 3/14/2023 13:38:45 PM  
Modified: 3/14/2023 13:38:45 PM

Electrophoresis File Run Summary



Peak table for Ladder :

| Peak | Size [bp] | Conc. [ng/μl] | Molarity [nmol/l] | Observations |
|------|-----------|---------------|-------------------|--------------|
| 1    | 15        | 4.20          | 4.4.2             | Lower Marker |
| 2    | 25        | 4.00          | 242.4             | Ladder Peak  |
| 3    | 50        | 4.00          | 121.2             | Ladder Peak  |
| 4    | 100       | 4.00          | 60.6              | Ladder Peak  |
| 5    | 150       | 4.00          | 40.3              | Ladder Peak  |
| 6    | 200       | 4.00          | 30.3              | Ladder Peak  |
| 7    | 300       | 4.00          | 20.2              | Ladder Peak  |
| 8    | 400       | 4.00          | 15.2              | Ladder Peak  |
| 9    | 500       | 4.00          | 12.1              | Ladder Peak  |
| 10   | 700       | 4.00          | 8.7               | Ladder Peak  |
| 11   | 850       | 4.00          | 7.1               | Ladder Peak  |
| 12   | 1,000     | 4.00          | 6.1               | Ladder Peak  |
| 13   | 1,500     | 2.10          | 2.1               | Upper Marker |
| 14   | 3,024     | 0.00          | 0.00              |              |
| 15   | 4,006     | 0.00          | 0.00              |              |

Assay Class: DNA 1000  
Data Path: C:\...-4903611\_2023-03-06\_NTS\_11\_20\_XhoI\_MseI.xad

Created: 3/14/2023 13:38:45 PM  
Modified: 3/14/2023 13:38:45 PM

Electrophoresis File Run Summary

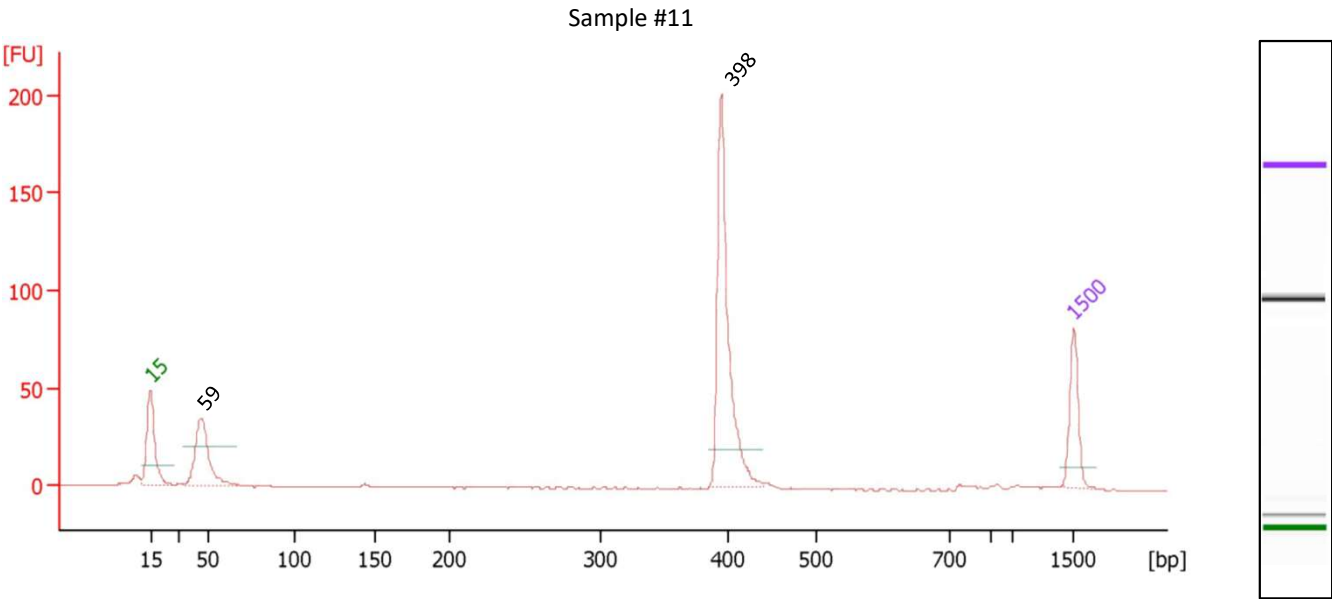

Peak table for Sample #11 :

| Peak | Size [bp] | Conc. [ng/μl] | Molarity [nmol/l] | Observations |
|------|-----------|---------------|-------------------|--------------|
| 1    | 15        | 4.20          | 424.2             | Lower Marker |
| 2    | 59        | 3.58          | 32.9              | Ladder Peak  |
| 3    | 398       | 36.87         | 121.2             | Ladder Peak  |
| 4    | 1,500     | 2.10          | 2.1               | Upper Marker |

Assay Class: DNA 1000  
Data Path: C:\...-4903611\_2023-03-06\_NTS\_11\_20\_XhoI\_MseI.xad

Created: 3/14/2023 13:38:45 PM  
Modified: 3/14/2023 13:38:45 PM

Electrophoresis File Run Summary

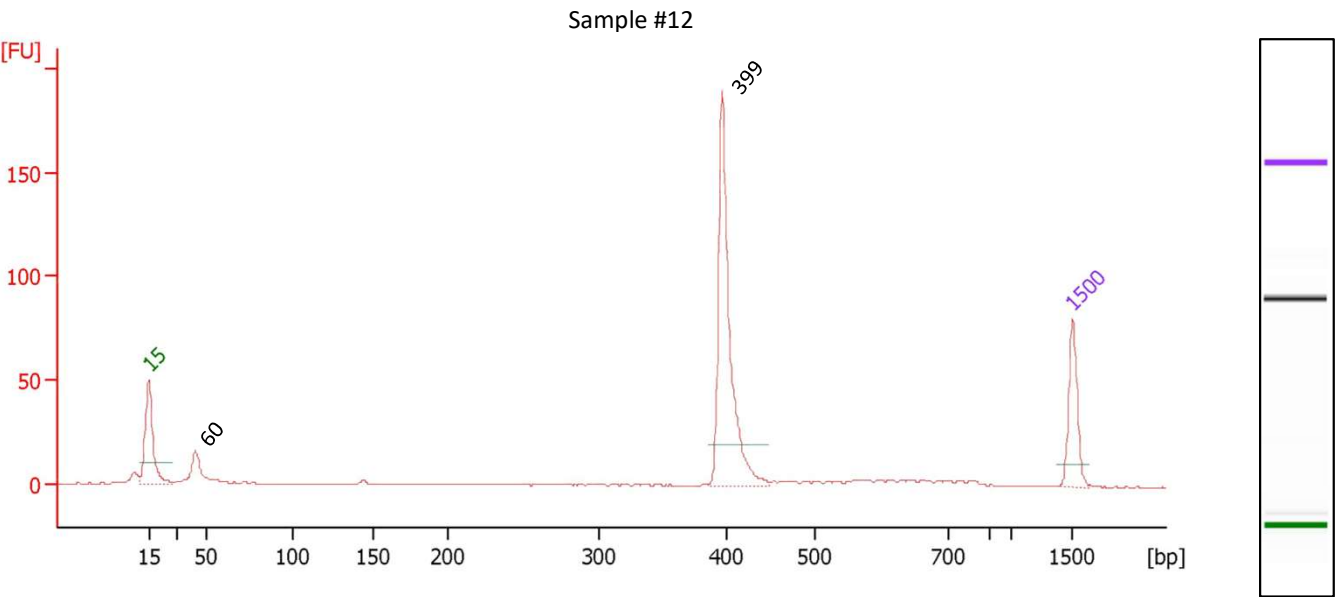

Peak table for Sample #12 :

| Peak | Size [bp] | Conc. [ng/μl] | Molarity [nmol/l] | Observations |
|------|-----------|---------------|-------------------|--------------|
| 1    | 15        | 4.20          | 424.2             | Lower Marker |
| 2    | 60        | 1.25          | 25.6              | Ladder Peak  |
| 3    | 399       | 25.34         | 112.3             | Ladder Peak  |
| 4    | 1,500     | 2.10          | 2.1               | Upper Marker |

Assay Class: DNA 1000  
Data Path: C:\...-4903611\_2023-03-06\_NTS\_11\_20\_XhoI\_MseI.xad

Created: 3/14/2023 13:38:45 PM  
Modified: 3/14/2023 13:38:45 PM

Electrophoresis File Run Summary

Sample #13



Peak table for Sample #13 :

| Peak | Size [bp] | Conc. [ng/μl] | Molarity [nmol/l] | Observations |
|------|-----------|---------------|-------------------|--------------|
| 1    | 15        | 4.20          | 424.4             | Lower Marker |
| 2    | 59        | 5.58          | 54.8              | Ladder Peak  |
| 3    | 398       | 7.85          | 42.1              | Ladder Peak  |
| 4    | 1,500     | 2.10          | 2.2               | Upper Marker |

Assay Class: DNA 1000  
Data Path: C:\...-4903611\_2023-03-06\_NTS\_11\_20\_XhoI\_MseI.xad

Created: 3/14/2023 13:38:45 PM  
Modified: 3/14/2023 13:38:45 PM

Electrophoresis File Run Summary

Sample #14

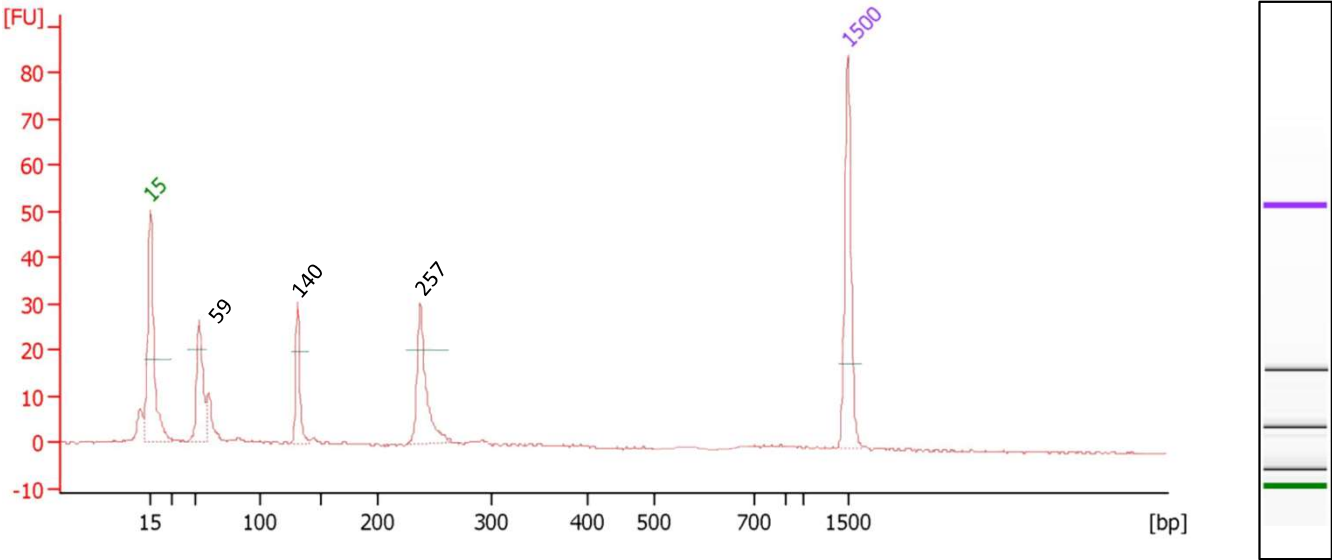

Peak table for Sample #14 :

| Peak | Size [bp] | Conc. [ng/μl] | Molarity [nmol/l] | Observations |
|------|-----------|---------------|-------------------|--------------|
| 1    | 15        | 4.20          | 424.2             | Lower Marker |
| 2    | 59        | 7.41          | 27.85             | Ladder Peak  |
| 3    | 140       | 8.84          | 33.69             | Ladder Peak  |
| 4    | 257       | 30.12         | 87.41             | Ladder Peak  |
| 5    | 1,500     | 2.10          | 2.1               | Upper Marker |

Assay Class: DNA 1000  
Data Path: C:\...-4903611\_2023-03-06\_NTS\_11\_20\_XhoI\_MseI.xad

Created: 3/14/2023 13:38:45 PM  
Modified: 3/14/2023 13:38:45 PM

Electrophoresis File Run Summary

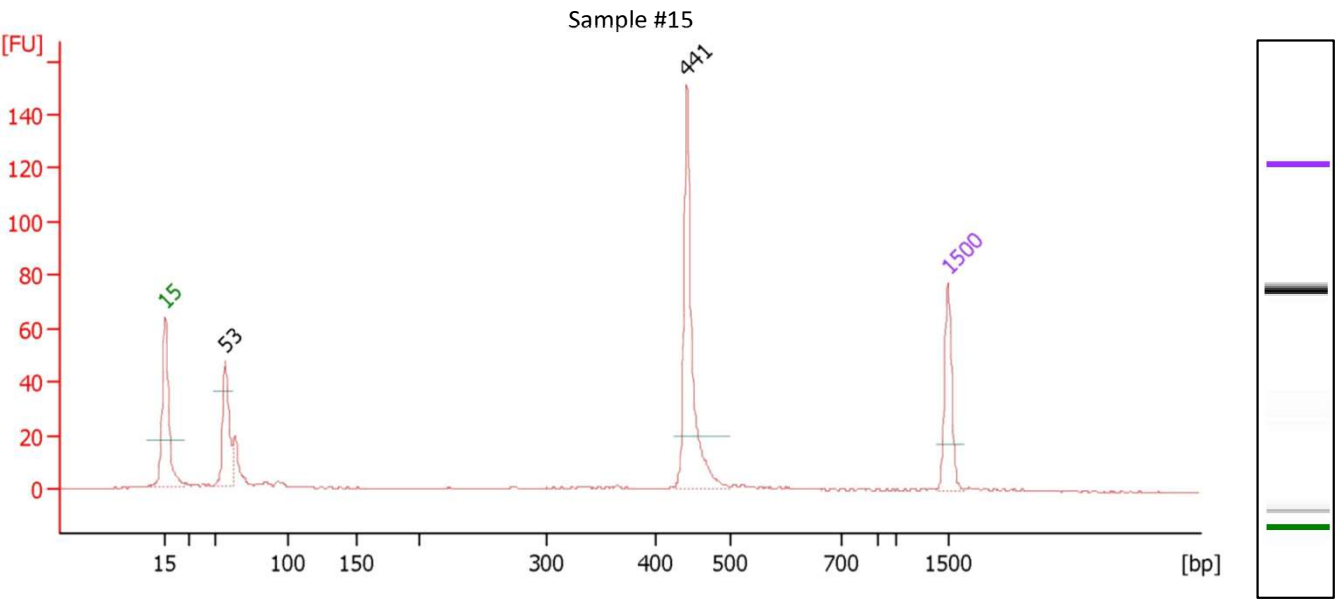

Peak table for Sample #15 :

| Peak | Size [bp] | Conc. [ng/μl] | Molarity [nmol/l] | Observations |
|------|-----------|---------------|-------------------|--------------|
| 1    | 15        | 4.20          | 424.4             | Lower Marker |
| 2    | 53        | 12.58         | 81.2              | Ladder Peak  |
| 3    | 441       | 25.55         | 99.6              | Ladder Peak  |
| 4    | 1,500     | 2.10          | 2.2               | Upper Marker |

Assay Class: DNA 1000  
Data Path: C:\...-4903611\_2023-03-06\_NTS\_11\_20\_XhoI\_MseI.xad

Created: 3/14/2023 13:38:45 PM  
Modified: 3/14/2023 13:38:45 PM

Electrophoresis File Run Summary

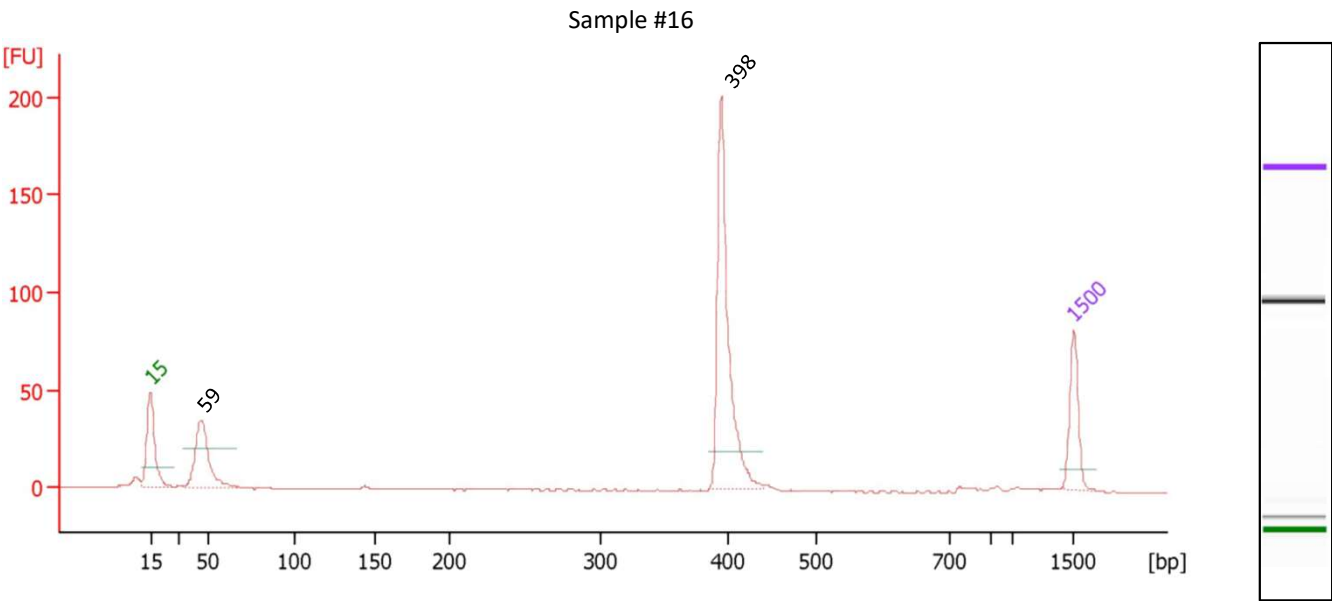

Peak table for Sample #16 :

| Peak | Size [bp] | Conc. [ng/μl] | Molarity [nmol/l] | Observations |
|------|-----------|---------------|-------------------|--------------|
| 1    | 15        | 4.20          | 424.2             | Lower Marker |
| 2    | 59        | 3.58          | 32.9              | Ladder Peak  |
| 3    | 398       | 36.87         | 121.2             | Ladder Peak  |
| 4    | 1,500     | 2.10          | 2.1               | Upper Marker |

Assay Class: DNA 1000  
Data Path: C:\...-4903611\_2023-03-06\_NTS\_11\_20\_XhoI\_MseI.xad

Created: 3/14/2023 13:38:45 PM  
Modified: 3/14/2023 13:38:45 PM

Electrophoresis File Run Summary

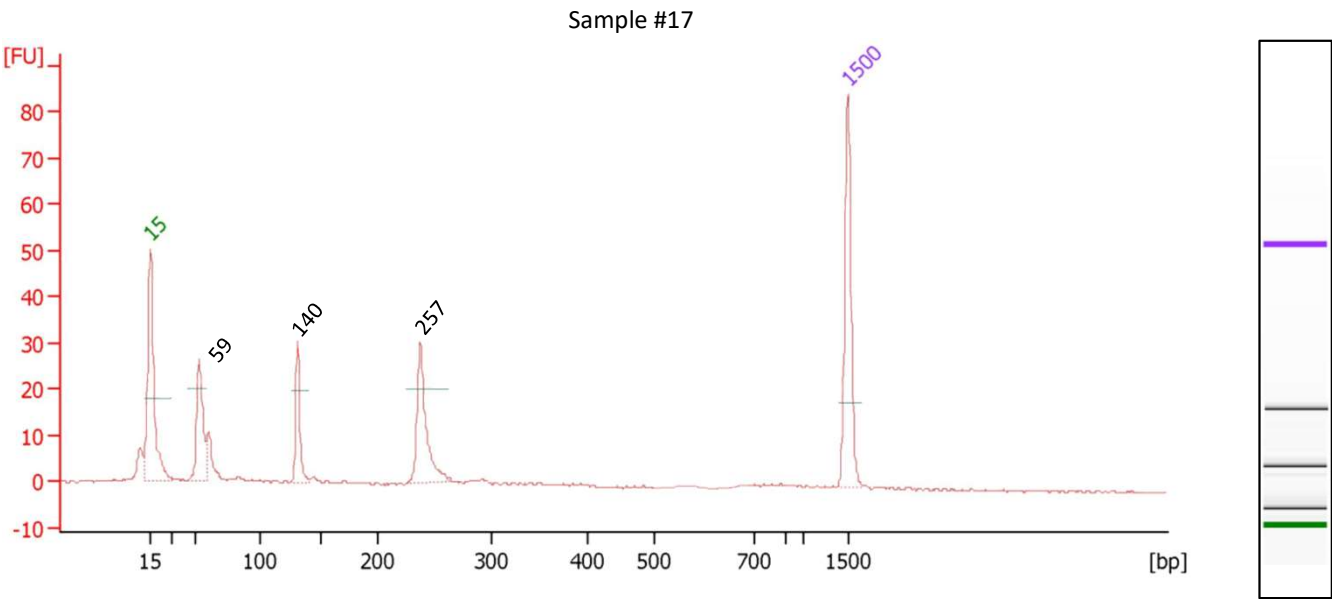

Peak table for Sample #17 :

| Peak | Size [bp] | Conc. [ng/μl] | Molarity [nmol/l] | Observations |
|------|-----------|---------------|-------------------|--------------|
| 1    | 15        | 4.20          | 424.2             | Lower Marker |
| 2    | 59        | 7.58          | 31.2              | Ladder Peak  |
| 3    | 140       | 8.47          | 31.2              | Ladder Peak  |
| 4    | 257       | 29.58         | 99.3              | Ladder Peak  |
| 5    | 1,500     | 2.10          | 2.1               | Upper Marker |

Assay Class: DNA 1000  
Data Path: C:\...-4903611\_2023-03-06\_NTS\_11\_20\_XhoI\_MseI.xad

Created: 3/14/2023 13:38:45 PM  
Modified: 3/14/2023 13:38:45 PM

Electrophoresis File Run Summary

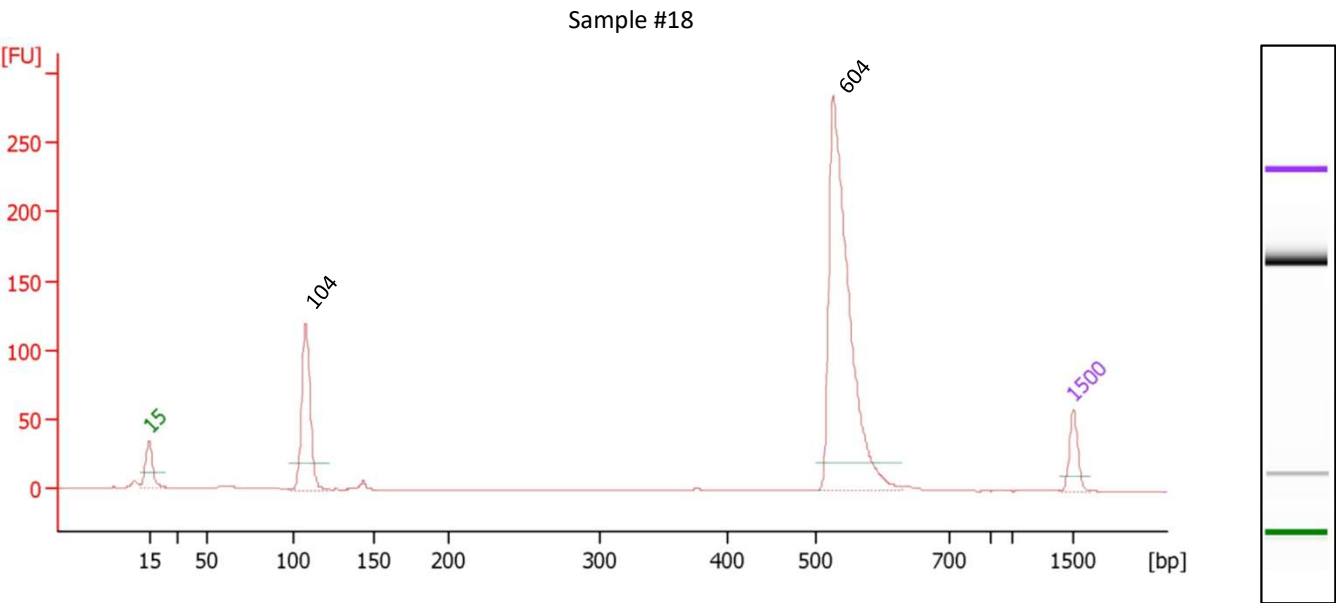

Peak table for Sample #18 :

| Peak | Size [bp] | Conc. [ng/μl] | Molarity [nmol/l] | Observations |
|------|-----------|---------------|-------------------|--------------|
| 1    | 15        | 4.20          | 424.4             | Lower Marker |
| 2    | 604       | 22.32         | 95.1              | Ladder Peak  |
| 3    | 104       | 15.22         | 25.4              | Ladder Peak  |
| 4    | 1,500     | 2.10          | 2.1               | Upper Marker |

Assay Class: DNA 1000  
Data Path: C:\...-4903611\_2023-03-06\_NTS\_11\_20\_XhoI\_MseI.xad

Created: 3/14/2023 13:38:45 PM  
Modified: 3/14/2023 13:38:45 PM

Electrophoresis File Run Summary

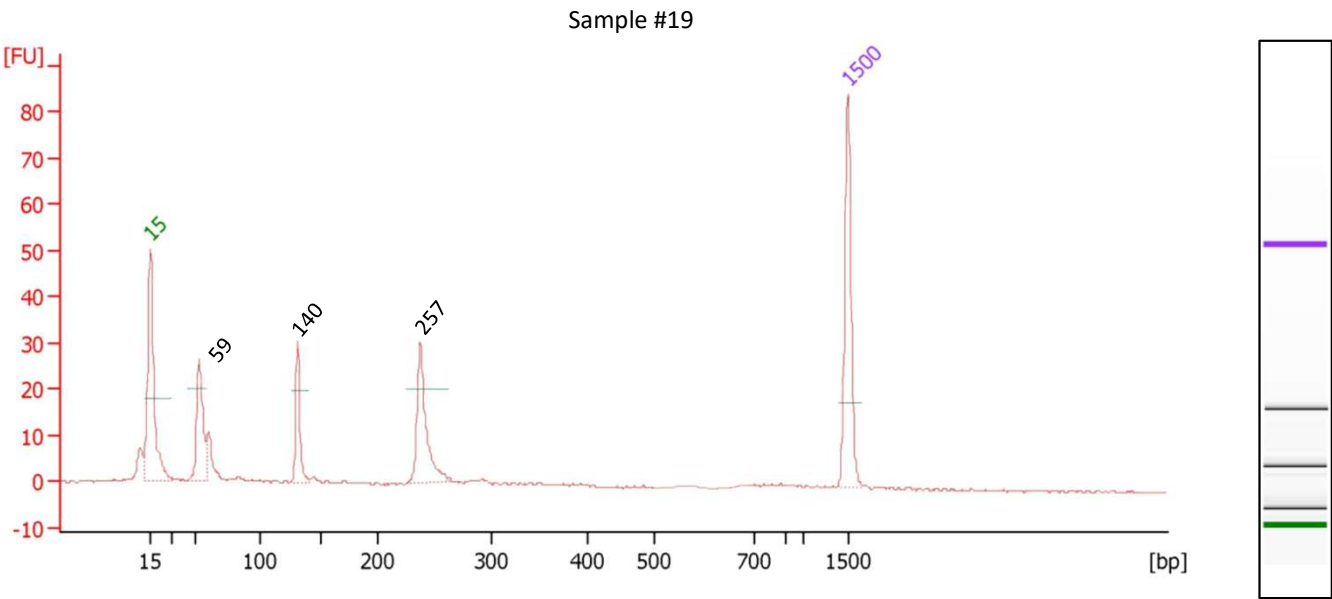

Peak table for Sample #19 :

| Peak | Size [bp] | Conc. [ng/μl] | Molarity [nmol/l] | Observations |
|------|-----------|---------------|-------------------|--------------|
| 1    | 15        | 4.20          | 424.2             | Lower Marker |
| 2    | 59        | 8.98          | 35.8              | Ladder Peak  |
| 3    | 140       | 8.47          | 33.6              | Ladder Peak  |
| 4    | 257       | 32.87         | 102.4             | Ladder Peak  |
| 5    | 1,500     | 2.10          | 2.1               | Upper Marker |

Assay Class: DNA 1000  
Data Path: C:\...-4903611\_2023-03-06\_NTS\_11\_20\_XhoI\_MseI.xad

Created: 3/14/2023 13:38:45 PM  
Modified: 3/14/2023 13:38:45 PM

Electrophoresis File Run Summary

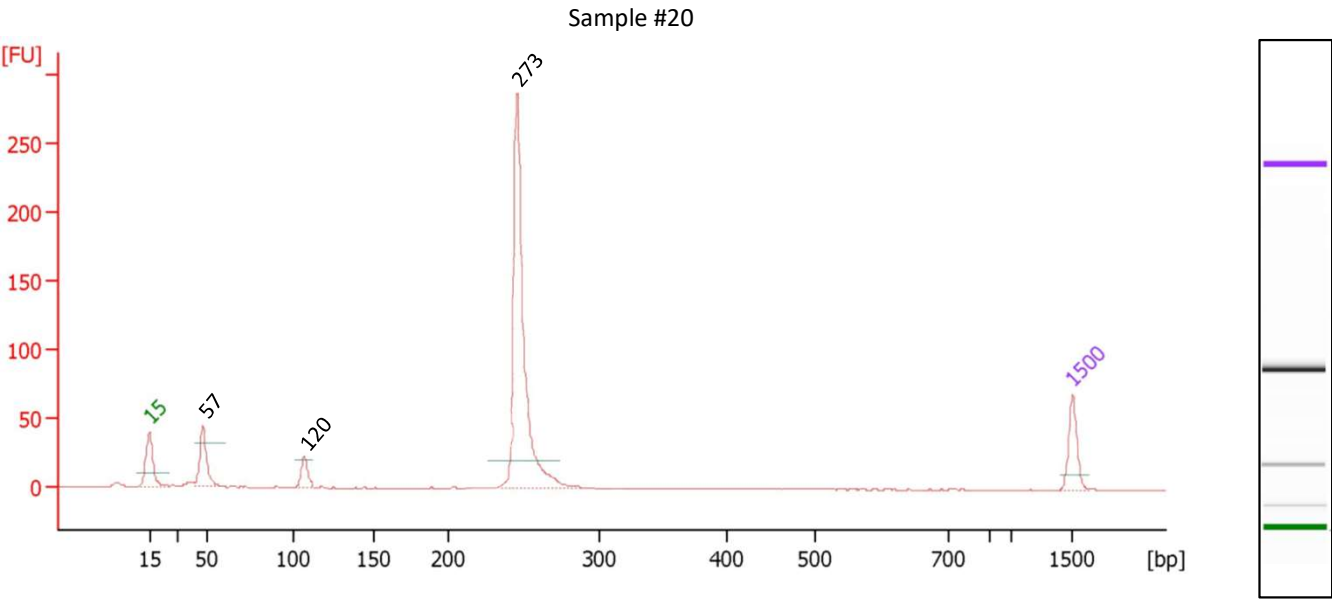

Peak table for Sample #20 :

| Peak | Size [bp] | Conc. [ng/μl] | Molarity [nmol/l] | Observations |
|------|-----------|---------------|-------------------|--------------|
| 1    | 15        | 4.20          | 424.4             | Lower Marker |
| 2    | 57        | 3.21          | 84.12             | Ladder Peak  |
| 3    | 120       | 2.23          | 87.22             | Ladder Peak  |
| 4    | 273       | 31.25         | 95.36             | Ladder Peak  |
| 5    | 1,500     | 2.10          | 2.2               | Upper Marker |

Assay Class: DNA 1000  
Data Path: C:\...-4903611\_2023-03-06\_NTS\_11\_20\_XhoI\_MseI.xad

Created: 3/14/2023 13:38:45 PM  
Modified: 3/14/2023 13:38:45 PM

Electrophoresis File Run Summary

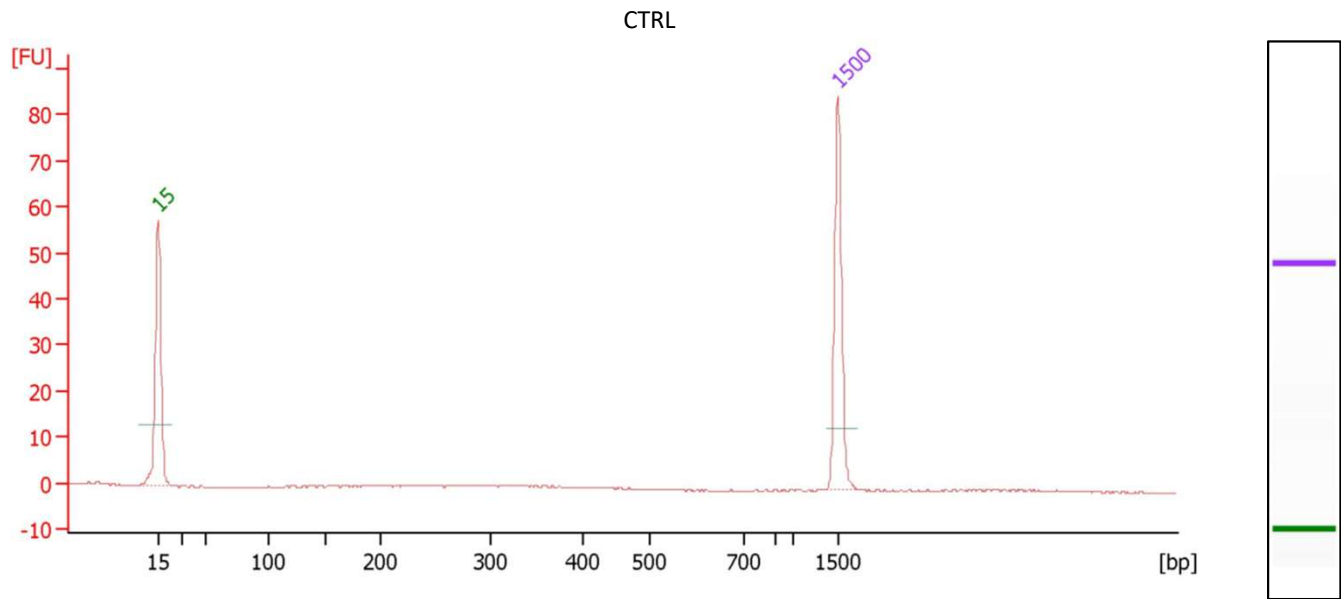

Peak table for Sample CTRL :

| Peak | Size [bp] | Conc. [ng/μl] | Molarity [nmol/l] | Observations |
|------|-----------|---------------|-------------------|--------------|
| 1    | 15        | 4.20          | 424.4             | Lower Marker |
| 2    | 1,500     | 2.10          | 2.2               | Upper Marker |

Assay Class: DNA 1000  
Data Path: C:\...-4903611\_2023-03-06\_NTS\_11\_20\_XhoI\_MseI.xad

Created: 3/14/2023 13:38:45 PM  
Modified: 3/14/2023 13:38:45 PM

Electrophoresis File Run Summary



Peak table for Sample CTRL :

| Peak | Size [bp] | Conc. [ng/μl] | Molarity [nmol/l] | Observations |
|------|-----------|---------------|-------------------|--------------|
| 1    | 15        | 4.20          | 424.4             | Lower Marker |
| 2    | 1,500     | 2.10          | 2.1               | Upper Marker |

Assay Class: DNA 1000  
Data Path: C:\...-4903611\_2023-03-06\_NTS\_11\_20\_XhoI\_MseI.xad

Created: 3/14/2023 13:38:45 PM  
Modified: 3/14/2023 13:38:45 PM

Curves

Standard Curve



Assay Class: DNA 1000  
Data Path: C:\...-4903611\_2023-03-06\_NTS\_11\_20\_XhoI\_MseI.xad

Created: 3/14/2023 13:38:45 PM  
Modified: 3/14/2023 13:38:45 PM

Electrophoresis File Run Summary (Chip Summary)

| Sample Name | Sample Content | Rest. Digest             | Status | Observation | Result Label | Result Color |
|-------------|----------------|--------------------------|--------|-------------|--------------|--------------|
| Sample #1   |                | <input type="checkbox"/> | ✓      |             |              |              |
| Sample #2   |                | <input type="checkbox"/> | ✓      |             |              |              |
| Sample #3   |                | <input type="checkbox"/> | ✓      |             |              |              |
| Sample #4   |                | <input type="checkbox"/> | ✓      |             |              |              |
| Sample #5   |                | <input type="checkbox"/> | ✓      |             |              |              |
| Sample #6   |                | <input type="checkbox"/> | ✓      |             |              |              |
| Sample #7   |                | <input type="checkbox"/> | ✓      |             |              |              |
| Sample #8   |                | <input type="checkbox"/> | ✓      |             |              |              |
| Sample #9   |                | <input type="checkbox"/> | ✓      |             |              |              |
| Sample #10  |                | <input type="checkbox"/> | ✓      |             |              |              |
| CTRL        |                | <input type="checkbox"/> | ✓      |             |              |              |
| CTRL        |                | <input type="checkbox"/> | ✓      |             |              |              |

Chip Lot # Reagent Kit Lot #

Chip Comments :

Assay Class: DNA 1000  
Data Path: C:\...-4903611\_2023-03-06\_NTS\_11\_20\_Xhol\_Msel.xad

Created: 3/14/2023 13:38:45 PM  
Modified: 3/14/2023 13:38:45 PM

Electrophoresis Assay Details

General Analysis Settings

Number of Available Sample and Ladder Wells (Max.) : 13  
Minimum Visible Range [s] : 30  
Maximum Visible Range [s] : 129  
Start Analysis Time Range [s] : 30  
End Analysis Time Range [s] : 128.95  
Ladder Concentration [ng/μl] : 44  
Uses Standard Area for Ladder Fragments  
Lower Marker Concentration [ng/μl] : 4.2  
Upper Marker Concentration [ng/μl] : 2.1  
Used Upper Marker for Quantitation  
Standard Curve Fit is Point to Point  
Show Data Aligned to Lower and Upper Marker

Result Label  
Result Color

Integrator Settings

Integration Start Time [s] : 30  
Integration End Time [s] : 128.95  
Slope Threshold : 0.5  
Height Threshold [FU] : 20  
Area Threshold : 0.1  
Width Threshold [s] : 0.5  
Baseline Plateau [s] : 0.5

Filter Settings

Filter Width [s] : 0.5  
Polynomial Order : 4

Ladder

| Ladder Peak | Size | Area |
|-------------|------|------|
| 1           | 15   | 25   |
| 2           | 25   | 26   |
| 3           | 50   | 34   |
| 4           | 100  | 41   |
| 5           | 150  | 45   |
| 6           | 200  | 52   |
| 7           | 300  | 63   |
| 8           | 400  | 76   |
| 9           | 500  | 83   |
| 10          | 700  | 88   |
| 11          | 850  | 86   |
| 12          | 1000 | 90   |
| 13          | 1500 | 52   |
