# Supplementary material for: Discrimination of Green Coffee (Coffea arabica and Coffea canephora) of Different Geographical Origin Based on Antioxidant Activity, High-Throughput Metabolomics, and DNA RFLP Fingerprinting
Source: MDPI journal article supplement (doi:10.3390/antiox12051135), 2023-05-21
Supplement: s1 [file s1]

**Supplementary Table S1:** Qualitative and quantitative chemical analysis of compounds extracted from CA and CC accessions from different geographical origin and identified by HPLC-ESI-MS/MS analysis.

| Compound                         | CC1           | CC2            | CC3           | CC4            | CC5           | CA1            | CA2             | CA3            | CA4             | CA5           | CA6            | CA7            | CA8           | CA9            | CA10           | CA11           | CA12            | CA13          | CA14          | CA15           |
|----------------------------------|---------------|----------------|---------------|----------------|---------------|----------------|-----------------|----------------|-----------------|---------------|----------------|----------------|---------------|----------------|----------------|----------------|-----------------|---------------|---------------|----------------|
| naringenin (µg/100g)             | 1.43 ± 0.03   | 5.19 ± 0.08    | 10.65 ± 0.41  | 2.27 ± 0.03    | 3.2 ± 0.05    | 5.9 ± 0.14     | 3.38 ± 0.05     | 5.91 ± 0.1     | 2.83 ± 0.08     | 5.12 ± 0.12   | 3.36 ± 0.07    | 7.59 ± 0.21    | 3.22 ± 0.07   | 2.79 ± 0.03    | 8.85 ± 0.3     | 9.96 ± 0.28    | 11.81 ± 0.22    | 3.9 ± 0.14    | 10.62 ± 0.21  | 11.04 ± 0.35   |
| kaempferol (µg/100g)             | 2.49 ± 0.06   | 1.6 ± 0.05     | 2.88 ± 0.06   | 4.55 ± 0.13    | 9.17 ± 0.2    | 6.7 ± 0.18     | 6.89 ± 0.14     | 6.22 ± 0.08    | 7.59 ± 0.11     | 7.46 ± 0.22   | 8.1 ± 0.22     | 5.82 ± 0.18    | 6.42 ± 0.12   | 10.01 ± 0.15   | 9.48 ± 0.26    | 7.81 ± 0.2     | 9.46 ± 0.37     | 7.04 ± 0.27   | 10.75 ± 0.26  | 6.68 ± 0.22    |
| dihydrokaempferol (µg/100g)      | 0.28 ± 0.01   | 0.37 ± 0.01    | 0.28 ± 0.01   | 0.24 ± 0.01    | 0.12 ± 0.01   | 0.19 ± 0.01    | 0.15 ± 0.01     | 0.2 ± 0.01     | 0.09 ± 0.01     | 0.16 ± 0.01   | 0.18 ± 0.01    | 0.22 ± 0.01    | 0.17 ± 0.01   | 0.28 ± 0.01    | 0.3 ± 0.01     | 0.28 ± 0.01    | 0.3 ± 0.01      | 0.3 ± 0.01    | 0.28 ± 0.01   | 0.36 ± 0.01    |
| catechin (µg/100g)               | 14.72 ± 0.25  | 10.56 ± 0.25   | 12.5 ± 0.17   | 10.14 ± 0.11   | 17.92 ± 0.62  | 16.94 ± 0.33   | 13.23 ± 0.41    | 22.77 ± 0.57   | 30.53 ± 0.51    | 23.86 ± 0.59  | 20 ± 0.35      | 13.87 ± 0.35   | 7.68 ± 0.23   | 11.2 ± 0.27    | 13.35 ± 0.16   | 15 ± 0.23      | 12.91 ± 0.23    | 11.45 ± 0.28  | 17.25 ± 0.17  | 13.47 ± 0.38   |
| epicatechin (µg/100g)            | 0.29 ± 0.01   | 0.53 ± 0.01    | 1.11 ± 0.04   | 0.81 ± 0.02    | 0.69 ± 0.02   | 0.32 ± 0       | 0.53 ± 0.01     | 0.61 ± 0.01    | 0.67 ± 0.01     | 0.5 ± 0       | 0.5 ± 0.01     | 0.63 ± 0.02    | 0.41 ± 0.01   | 0.87 ± 0.02    | 0.65 ± 0.01    | 0.79 ± 0.01    | 0.75 ± 0.02     | 0.94 ± 0.03   | 1.02 ± 0.01   | 0.81 ± 0.01    |
| quercetin (µg/100g)              | 6.99 ± 0.25   | 3.17 ± 0.09    | 16.82 ± 0.63  | 16.63 ± 0.25   | 20.76 ± 0.22  | 24.13 ± 0.37   | 34.26 ± 0.42    | 29 ± 0.51      | 15.91 ± 0.19    | 14.21 ± 0.21  | 20.87 ± 0.57   | 25.62 ± 0.41   | 15.04 ± 0.3   | 17.31 ± 0.43   | 20.99 ± 0.65   | 11.58 ± 0.39   | 11.87 ± 0.45    | 12.08 ± 0.25  | 22.43 ± 0.65  | 20.25 ± 0.49   |
| taxifolin (µg/100g)              | 2.94 ± 0.04   | 2.68 ± 0.09    | 3.98 ± 0.1    | 3.15 ± 0.1     | 12 ± 0.24     | 5.48 ± 0.17    | 4.49 ± 0.17     | 4.29 ± 0.15    | 8.77 ± 0.18     | 5.75 ± 0.14   | 9.59 ± 0.16    | 6.01 ± 0.21    | 7.18 ± 0.16   | 16.48 ± 0.54   | 6.14 ± 0.11    | 6.84 ± 0.14    | 5.97 ± 0.14     | 5.65 ± 0.09   | 7.99 ± 0.31   | 5.43 ± 0.14    |
| isorhamnetin (µg/100g)           | 14.02 ± 0.28  | 13.11 ± 0.36   | 27.98 ± 0.49  | 22.09 ± 0.47   | 10.41 ± 0.33  | 16.22 ± 0.42   | 9.05 ± 0.33     | 16.19 ± 0.41   | 7.95 ± 0.13     | 25.35 ± 0.39  | 20.83 ± 0.51   | 6.94 ± 0.12    | 6.12 ± 0.2    | 9.97 ± 0.22    | 10.46 ± 0.33   | 14.4 ± 0.46    | 19.93 ± 0.35    | 7.13 ± 0.09   | 19.19 ± 0.75  | 14.98 ± 0.5    |
| myricetin (µg/100g)              | 1.33 ± 0.02   | 1.04 ± 0.03    | 1.1 ± 0.01    | 0.93 ± 0.03    | 2.11 ± 0.04   | 1.52 ± 0.05    | 1.24 ± 0.02     | 1.97 ± 0.04    | 2.66 ± 0.07     | 2.9 ± 0.09    | 2.29 ± 0.07    | 1.25 ± 0.04    | 0.9 ± 0.01    | 1.29 ± 0.04    | 1.26 ± 0.02    | 1.36 ± 0.02    | 1.6 ± 0.04      | 1.08 ± 0.01   | 1.64 ± 0.03   | 1.52 ± 0.02    |
| ampelopsin (µg/100g)             | 0.6 ± 0.01    | 0.99 ± 0.02    | 2.64 ± 0.03   | 1.91 ± 0.02    | 0.52 ± 0.01   | 1.39 ± 0.04    | 1.85 ± 0.03     | 2.96 ± 0.11    | 0.56 ± 0.02     | 0.48 ± 0.01   | 0.45 ± 0.01    | 0.27 ± 0.01    | 1.57 ± 0.02   | 0.36 ± 0.01    | 0.31 ± 0.01    | 0.31 ± 0.01    | 0.31 ± 0.01     | 0.34 ± 0.01   | 0.37 ± 0.01   | 0.35 ± 0.01    |
| kaempferol_rhamnoside (µg/100g)  | 4.86 ± 0.05   | 1.71 ± 0.05    | 2.8 ± 0.04    | 3.08 ± 0.09    | 4.01 ± 0.05   | 2.57 ± 0.06    | 3.52 ± 0.06     | 3.67 ± 0.12    | 4.94 ± 0.05     | 5.14 ± 0.18   | 4.64 ± 0.07    | 4.14 ± 0.12    | 3.56 ± 0.13   | 4.49 ± 0.07    | 3.17 ± 0.03    | 4.71 ± 0.08    | 5.18 ± 0.19     | 4.29 ± 0.06   | 5.67 ± 0.12   | 4.41 ± 0.16    |
| hyperoside (µg/100g)             | 167.56 ± 4.08 | 509.74 ± 11.23 | 157.33 ± 3.12 | 416.92 ± 10.91 | 438.11 ± 8.47 | 716.61 ± 12.42 | 1052.92 ± 20.15 | 876.31 ± 14.73 | 1035.22 ± 30.26 | 392.83 ± 7.76 | 303.81 ± 11.18 | 754.74 ± 27.87 | 582.27 ± 16.5 | 792.39 ± 22.54 | 675.65 ± 11.48 | 851.63 ± 22.67 | 1127.02 ± 22.41 | 866.43 ± 18.1 | 603.1 ± 18.73 | 1106.3 ± 21.44 |
| naringenin_glucoside (µg/100g)   | 20.68 ± 0.41  | 77.2 ± 1.24    | 118.45 ± 1.77 | 25.56 ± 0.44   | 48.59 ± 1.02  | 63.75 ± 1.12   | 39.46 ± 0.73    | 69.35 ± 1.59   | 42.42 ± 0.58    | 77.9 ± 2.37   | 49 ± 0.55      | 105.81 ± 3.89  | 46.27 ± 0.79  | 40.91 ± 1.61   | 95.96 ± 3.62   | 127.99 ± 1.35  | 138.94 ± 4.23   | 53.35 ± 1.42  | 133.69 ± 3.95 | 133.89 ± 3.8   |
| naringenin_galactoside (µg/100g) | 4.59 ± 0.07   | 2.4 ± 0.07     | 5.52 ± 0.14   | 6.47 ± 0.1     | 3.95 ± 0.09   | 8.36 ± 0.11    | 5.12 ± 0.19     | 2.14 ± 0.02    | 4.71 ± 0.07     | 7.07 ± 0.25   | 4.07 ± 0.16    | 2.51 ± 0.08    | 4.55 ± 0.1    | 3.71 ± 0.08    | 3.59 ± 0.13    | 3.28 ± 0.05    | 4.49 ± 0.13     | 3.91 ± 0.11   | 3.37 ± 0.04   | 3.74 ± 0.14    |
| catechin_sambubioside (µg/100g)  | 2.17 ± 0.03   | 2.39 ± 0.05    | 1.85 ± 0.02   | 2.19 ± 0.05    | 3.05 ± 0.1    | 2.2 ± 0.07     | 2.92 ± 0.06     | 1.87 ± 0.06    | 2.49 ± 0.09     | 2.48 ± 0.06   | 2.34 ± 0.07    | 2.89 ± 0.06    | 2.71 ± 0.07   | 2.65 ± 0.06    | 3.55 ± 0.1     | 3.24 ± 0.1     | 2.11 ± 0.05     | 3.14 ± 0.08   | 2.4 ± 0.06    | 2.43 ± 0.08    |

|                                               |                  |                  |                  |                  |                   |                  |                  |                  |                  |                  |                  |                  |                  |                  |                  |                  |                  |                  |                  |                   |
|-----------------------------------------------|------------------|------------------|------------------|------------------|-------------------|------------------|------------------|------------------|------------------|------------------|------------------|------------------|------------------|------------------|------------------|------------------|------------------|------------------|------------------|-------------------|
| quercitrin<br>(µg/100g)                       | 140.91<br>± 5.01 | 82.71 ±<br>1.49  | 100.96<br>± 1.87 | 42.25 ±<br>1.6   | 567.33 ±<br>13.41 | 282.73 ±<br>5.38 | 186.09 ±<br>6.53 | 224.38 ±<br>6.05 | 311.72 ±<br>6.97 | 170.77<br>± 5.41 | 244.57 ±<br>5.94 | 241.66 ±<br>7.95 | 136.54<br>± 2.15 | 189.69 ±<br>5.61 | 277.37 ±<br>3.99 | 463.94 ±<br>8.02 | 368.85 ±<br>5.36 | 265.03<br>± 9.18 | 281.61<br>± 5.77 | 518.53 ±<br>14.14 |
| taxifolin_galactosid<br>e (µg/100g)           | 27.73<br>± 0.96  | 42.23 ±<br>0.53  | 59.93 ±<br>1.56  | 29.73 ±<br>0.96  | 15.81 ±<br>0.58   | 17.33 ±<br>0.68  | 39.59 ±<br>0.82  | 15.83 ±<br>0.29  | 19.73 ±<br>0.69  | 18.1 ±<br>0.7    | 23.64 ±<br>0.23  | 19.64 ±<br>0.46  | 19.2 ±<br>0.2    | 32.44 ±<br>0.72  | 13.1 ±<br>0.38   | 25.65 ±<br>0.26  | 28.23 ±<br>0.7   | 39.27 ±<br>0.67  | 15.18 ±<br>0.46  | 25.76 ±<br>0.95   |
| taxifolin_glucoside<br>(µg/100g)              | 26.83<br>± 1.01  | 17.73 ±<br>0.22  | 13.89 ±<br>0.26  | 38.03 ±<br>0.43  | 10.48 ±<br>0.41   | 13.66 ±<br>0.18  | 5.86 ±<br>0.21   | 3.22 ±<br>0.09   | 11.44 ±<br>0.34  | 17.86 ±<br>0.47  | 28.5 ±<br>1.05   | 11.16 ±<br>0.28  | 10.43 ±<br>0.19  | 21.1 ±<br>0.64   | 12.99 ±<br>0.36  | 10.02 ±<br>0.26  | 32.32 ±<br>0.63  | 11.19 ±<br>0.43  | 15.96 ±<br>0.62  | 5.59 ±<br>0.18    |
| naringenin_sambu<br>bioside (µg/100g)         | 31.55<br>± 0.51  | 70.86 ±<br>1.39  | 35.42 ±<br>0.41  | 86.96 ±<br>2.87  | 79.37 ±<br>2.68   | 23.79 ±<br>0.8   | 66.14 ±<br>2.09  | 50.18 ±<br>0.54  | 92.64 ±<br>3.3   | 70.56 ±<br>2.23  | 65.19 ±<br>2.33  | 52.9 ±<br>0.58   | 47.28 ±<br>1.42  | 71.88 ±<br>2.51  | 52.88 ±<br>1.85  | 36.32 ±<br>1.01  | 44.18 ±<br>0.68  | 49.92 ±<br>1.01  | 45.58 ±<br>0.83  | 40.46 ±<br>0.7    |
| naringenin_rutinos<br>ide (µg/100g)           | 18.48<br>± 0.26  | 17.94 ±<br>0.37  | 15.79 ±<br>0.32  | 3.67 ±<br>0.1    | 11.49 ±<br>0.17   | 12.73 ±<br>0.19  | 9.72 ±<br>0.14   | 10.53 ±<br>0.11  | 8.46 ±<br>0.31   | 6.16 ±<br>0.24   | 9.12 ±<br>0.2    | 10.39 ±<br>0.37  | 10.62 ±<br>0.11  | 10.51 ±<br>0.38  | 8.08 ±<br>0.15   | 10.34 ±<br>0.27  | 12.92 ±<br>0.16  | 11.6 ±<br>0.4    | 13.01 ±<br>0.31  | 10.15 ±<br>0.39   |
| kaempferol_sambu<br>bioside (µg/100g)         | 7.27 ±<br>0.08   | 1.65 ±<br>0.02   | 2.96 ±<br>0.1    | 2.75 ±<br>0.03   | 8.14 ±<br>0.2     | 5.88 ±<br>0.16   | 7.26 ±<br>0.16   | 5.34 ±<br>0.11   | 7.88 ±<br>0.12   | 6.36 ±<br>0.23   | 6.5 ±<br>0.16    | 6.05 ±<br>0.22   | 4.6 ±<br>0.14    | 6.82 ±<br>0.17   | 9.59 ±<br>0.28   | 7.77 ±<br>0.19   | 10.72 ±<br>0.41  | 6.75 ±<br>0.16   | 10.07 ±<br>0.24  | 7.5 ±<br>0.22     |
| dihydrokaempferol<br>_sambioside<br>(µg/100g) | 8.88 ±<br>0.2    | 5.27 ±<br>0.12   | 3.28 ±<br>0.11   | 11.22 ±<br>0.26  | 9.6 ±<br>0.19     | 7.47 ±<br>0.23   | 7.28 ±<br>0.09   | 8.56 ±<br>0.12   | 9.41 ±<br>0.33   | 6.99 ±<br>0.24   | 7.1 ±<br>0.18    | 7.4 ±<br>0.12    | 7.63 ±<br>0.23   | 8.36 ±<br>0.09   | 6.34 ±<br>0.15   | 7.71 ±<br>0.19   | 9.41 ±<br>0.13   | 7.22 ±<br>0.15   | 7.88 ±<br>0.28   | 7.81 ±<br>0.18    |
| kaempferol_rutino<br>side (µg/100g)           | 51.72<br>± 0.78  | 40.09 ±<br>0.95  | 74.01 ±<br>1.23  | 79.9 ±<br>0.86   | 182.48 ±<br>3.51  | 135.72 ±<br>4.78 | 145.57 ±<br>5.28 | 144.38 ±<br>2.37 | 159.55 ±<br>5.81 | 172.24<br>± 6.19 | 176.27 ±<br>2.14 | 143.83 ±<br>5.56 | 120.33<br>± 1.35 | 182.75 ±<br>6.8  | 235.85 ±<br>7.03 | 172.99 ±<br>6.43 | 243.45 ±<br>5.72 | 139.48<br>± 4.65 | 199.9 ±<br>2.89  | 150.49 ±<br>2.08  |
| quercetin_glucuron<br>ide (µg/100g)           | 18.82<br>± 0.31  | 11.19 ±<br>0.43  | 44.58 ±<br>1.14  | 39.46 ±<br>1.43  | 36.46 ±<br>0.48   | 12.74 ±<br>0.26  | 9.41 ±<br>0.26   | 22.13 ±<br>0.7   | 13.23 ±<br>0.27  | 47.27 ±<br>1.14  | 51.97 ±<br>0.62  | 21.65 ±<br>0.79  | 28.47 ±<br>1.05  | 34.41 ±<br>0.91  | 48 ±<br>1.46     | 30.08 ±<br>0.98  | 52.06 ±<br>0.54  | 29.36 ±<br>0.33  | 32.63 ±<br>0.43  | 39.12 ±<br>0.78   |
| taxifolin_sambubio<br>side (µg/100g)          | 13.8 ±<br>0.3    | 10.27 ±<br>0.34  | 11.87 ±<br>0.27  | 14.01 ±<br>0.21  | 22.87 ±<br>0.29   | 12.16 ±<br>0.31  | 9.88 ±<br>0.35   | 12.74 ±<br>0.4   | 13.08 ±<br>0.19  | 9.82 ±<br>0.12   | 11.39 ±<br>0.25  | 16.12 ±<br>0.24  | 19.3 ±<br>0.59   | 20.92 ±<br>0.62  | 14.09 ±<br>0.17  | 20.97 ±<br>0.35  | 13.49 ±<br>0.48  | 23.73 ±<br>0.72  | 17.46 ±<br>0.45  | 25.96 ±<br>1.03   |
| rutin (µg/100g)                               | 171.11<br>± 6.69 | 151.6 ±<br>3.37  | 116.36<br>± 3.42 | 150.45 ±<br>4.07 | 285.85 ±<br>10.73 | 655.49 ±<br>25.4 | 225.39 ±<br>3.29 | 197.14 ±<br>6.1  | 222.59 ±<br>3.35 | 249.44<br>± 7.47 | 247.35 ±<br>5.23 | 270.76 ±<br>7.94 | 345.38<br>± 9.9  | 257.34 ±<br>4.42 | 239.75 ±<br>5.82 | 231.07 ±<br>2.59 | 328.26 ±<br>6.21 | 353.06<br>± 6.08 | 344.41<br>± 3.57 | 335.57 ±<br>6.33  |
| taxifolin_rutinosid<br>e (µg/100g)            | 141.85<br>± 2.12 | 171.59 ±<br>1.89 | 161.29<br>± 4.59 | 135.03 ±<br>2.21 | 94.01 ±<br>1.93   | 132.69 ±<br>5.02 | 186.55 ±<br>3.05 | 52.34 ±<br>1.36  | 132.52 ±<br>4.84 | 119.41<br>± 3.27 | 182.86 ±<br>7.18 | 111.28 ±<br>2.46 | 79.17 ±<br>2.89  | 124.57 ±<br>1.97 | 159.29 ±<br>4.76 | 180.12 ±<br>4.48 | 367.51 ±<br>4.46 | 227.4 ±<br>7.32  | 159.26<br>± 5.37 | 165.42 ±<br>3.67  |
| ampelopsin_rutin<br>(µg/100g)                 | 1.56 ±<br>0.05   | 0.89 ±<br>0.03   | 1.37 ±<br>0.05   | 1.55 ±<br>0.05   | 1.17 ±<br>0.03    | 0.73 ±<br>0.01   | 0.77 ±<br>0.01   | 0.94 ±<br>0.02   | 1.13 ±<br>0.02   | 1.1 ±<br>0.04    | 1.55 ±<br>0.01   | 1.74 ±<br>0.06   | 1.4 ±<br>0.03    | 1.7 ±<br>0.05    | 2.09 ±<br>0.07   | 1.24 ±<br>0.02   | 1.73 ±<br>0.06   | 1.42 ±<br>0.04   | 1.76 ±<br>0.03   | 0.95 ±<br>0.02    |
| theobromine<br>(mg/g)                         | 1.15 ±<br>0.03   | 1.1 ±<br>0.03    | 1.01 ±<br>0.02   | 0.89 ±<br>0.02   | 1.21 ±<br>0.04    | 0.76 ±<br>0.01   | 1.18 ±<br>0.03   | 1.44 ±<br>0.03   | 0.82 ±<br>0.01   | 0.9 ±<br>0.02    | 1.03 ±<br>0.02   | 2.2 ±<br>0.07    | 1.5 ±<br>0.04    | 1.44 ±<br>0.05   | 1.11 ±<br>0.03   | 0.94 ±<br>0.01   | 1.22 ±<br>0.02   | 1.46 ±<br>0.02   | 1.13 ±<br>0.02   | 1.45 ±<br>0.04    |
| theophyllin (mg/g)                            | 0.88 ±<br>0.02   | 0.45 ±<br>0.01   | 0.55 ±<br>0.01   | 0.63 ±<br>0.02   | 0.48 ±<br>0.01    | 0.32 ±<br>0.01   | 0.29 ±<br>0.01   | 0.35 ±<br>0.01   | 0.31 ±<br>0.01   | 0.43 ±<br>0.01   | 0.47 ±<br>0.01   | 0.63 ±<br>0.01   | 0.42 ±<br>0.01   | 0.43 ±<br>0.01   | 0.43 ±<br>0.01   | 0.6 ±<br>0.01    | 0.61 ±<br>0.01   | 0.74 ±<br>0.01   | 0.43 ±<br>0.01   | 0.47 ±<br>0.01    |
| caffeine (mg/g)                               | 12.68<br>± 0.5   | 23.69 ±<br>0.72  | 21.19 ±<br>1.57  | 21.84 ±<br>1.13  | 17.76 ±<br>0.55   | 8.65 ±<br>0.63   | 7.7 ± 0.44       | 7.37 ±<br>0.2    | 7.21 ±<br>0.33   | 9.02 ±<br>0.28   | 8.59 ±<br>0.45   | 8.37 ±<br>0.32   | 8.96 ±<br>0.28   | 9.54 ±<br>0.63   | 8.89 ±<br>0.17   | 8.75 ±<br>0.51   | 9.2 ± 0.23       | 7.59 ±<br>0.15   | 9.24 ±<br>0.4    | 8.8 ±<br>0.57     |
| melatonin (µg/g)                              | 6.87 ±<br>0.23   | 6.47 ±<br>0.09   | 8.07 ±<br>0.23   | 9.32 ±<br>0.1    | 8.12 ±<br>0.21    | 4.13 ±<br>0.08   | 5.73 ±<br>0.21   | 6.24 ±<br>0.14   | 8.11 ±<br>0.14   | 7.37 ±<br>0.17   | 4.42 ±<br>0.12   | 5.4 ±<br>0.17    | 4.53 ±<br>0.09   | 7.06 ±<br>0.13   | 4.4 ±<br>0.13    | 4.28 ±<br>0.08   | 5.07 ±<br>0.16   | 7.13 ±<br>0.2    | 4.91 ±<br>0.1    | 5.55 ±<br>0.16    |
