# Supplementary material for: Discrimination of Green Coffee (Coffea arabica and Coffea canephora) of Different Geographical Origin Based on Antioxidant Activity, High-Throughput Metabolomics, and DNA RFLP Fingerprinting
Source: MDPI journal article supplement (doi:10.3390/antiox12051135), 2023-05-21
Supplement: s1 [file s1]

Supplementary Data S1: PCR products of *trnL-trnF* region separated by the Agilent 2100 Bioanalyzer and reporting the electropherograms of CA e CC accessions before and after digestion with *A**lu**I*.

2100\_expert\_DNA\_1000\_DE34903611\_2023-03-06\_TRN\_1\_10.xad

Assay Class: DNA 1000  
Data Path: C:\...-30\2100\_expert\_DNA\_1000\_DE34903611\_2023-03-06\_TRN\_1\_10.xad

Created: 3/06/2023 4:21:53 PM  
Modified: 3/06/2023 4:21:53 PM

Electrophoresis File Run Summary

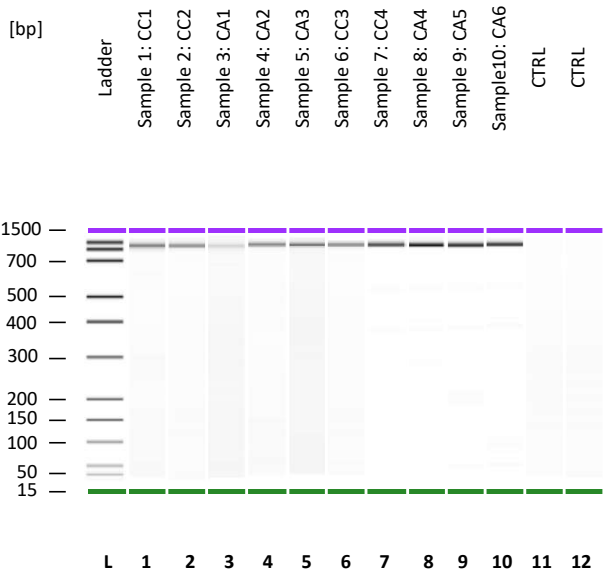

Instrument Information:  
Instrument Name: DE34903611      Firmware: C.01.069  
Serial #: DE34903611      Type: G2938C  
Assay Information:  
Assay Origin Path: C:\Program Files\Agilent\2100 bioanalyzer\2100  
expert\assays\dsDNA\DNA 1000 Series II.xsy  
Assay Class: DNA 1000  
Version: 2.3  
Assay Comments: DNA Analysis 2 - 1000 bp  
© Copyright 2003-2009 Agilent Technologies, Inc.  
Chip Information:  
Chip Lot #:  
Reagent Kit Lot #:  
Chip Comments:

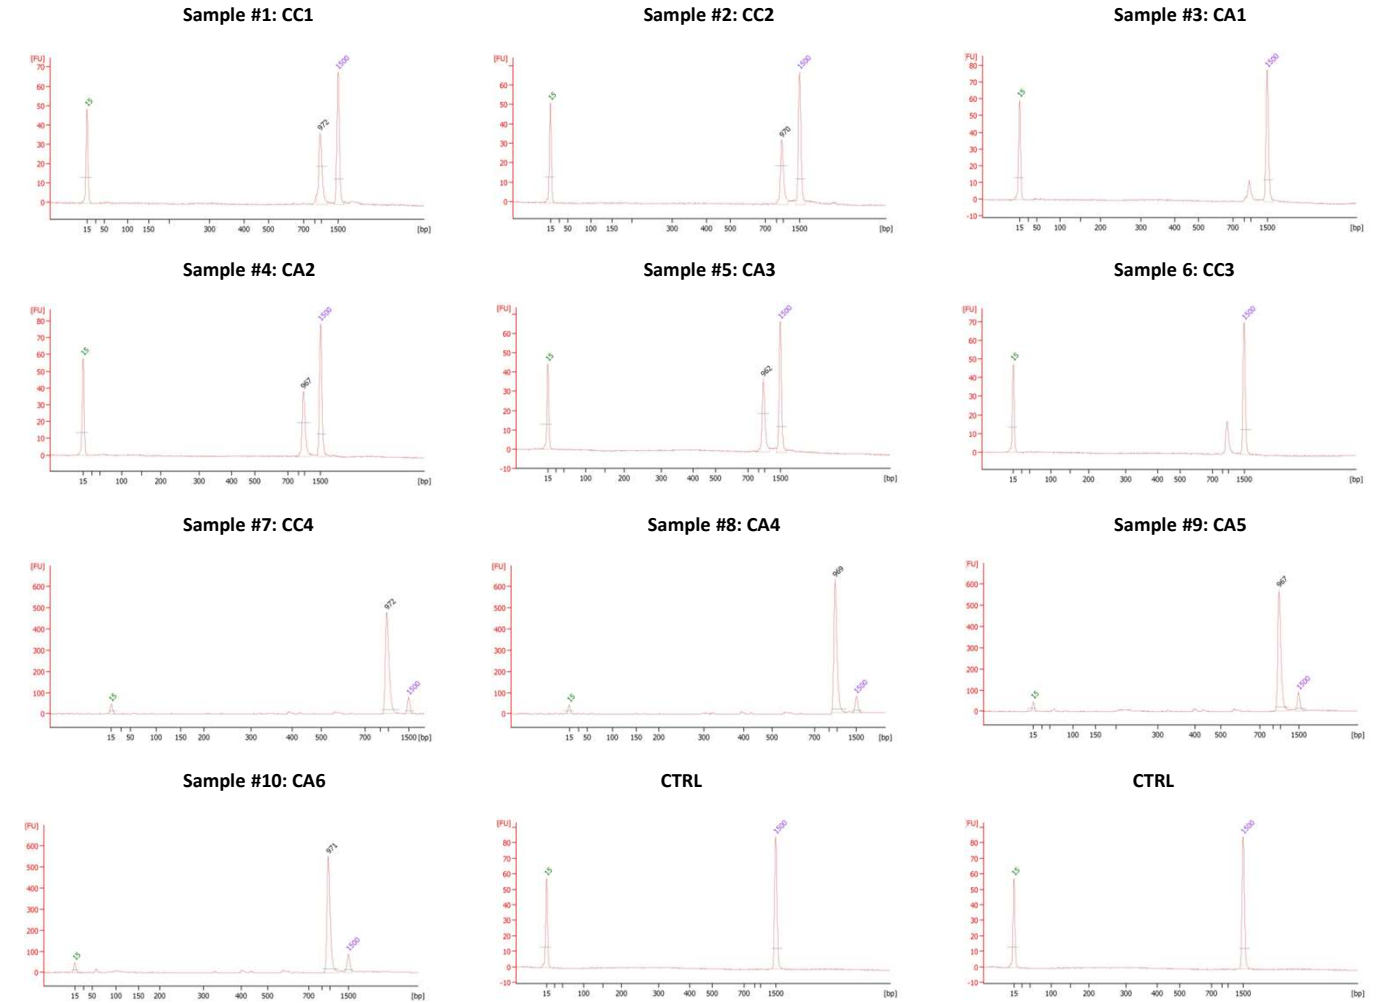

Assay Class: DNA 1000  
Data Path: C:\...-30\2100\_expert\_DNA 1000\_DE34903611\_2023-03-06\_TRN\_1\_10.xad

Created: 3/06/2023 4:21:53 PM  
Modified: 3/06/2023 4:21:53 PM

Electrophoresis File Run Summary

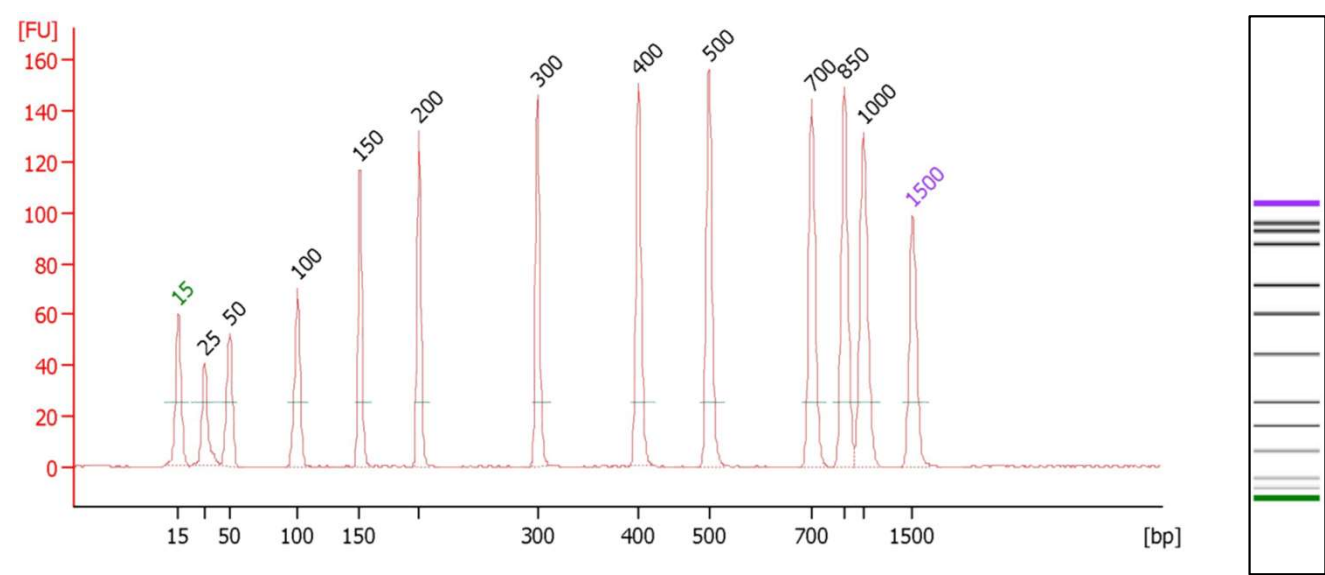

Peak table for Ladder :

| Peak | Size [bp] | Conc. [ng/μl] | Molarity [nmol/l] | Observations |
|------|-----------|---------------|-------------------|--------------|
| 1    | 15        | 4.20          | 4.4.2             | Lower Marker |
| 2    | 25        | 4.00          | 242.4             | Ladder Peak  |
| 3    | 50        | 4.00          | 121.2             | Ladder Peak  |
| 4    | 100       | 4.00          | 60.6              | Ladder Peak  |
| 5    | 150       | 4.00          | 40.3              | Ladder Peak  |
| 6    | 200       | 4.00          | 30.3              | Ladder Peak  |
| 7    | 300       | 4.00          | 20.2              | Ladder Peak  |
| 8    | 400       | 4.00          | 15.2              | Ladder Peak  |
| 9    | 500       | 4.00          | 12.1              | Ladder Peak  |
| 10   | 700       | 4.00          | 8.7               | Ladder Peak  |
| 11   | 850       | 4.00          | 7.1               | Ladder Peak  |
| 12   | 1,000     | 4.00          | 6.1               | Ladder Peak  |
| 13   | 1,500     | 2.10          | 2.1               | Upper Marker |

Assay Class: DNA 1000  
Data Path: C:\...-30\2100\_expert\_DNA 1000\_DE34903611\_2023-03-06\_TRN\_1\_10.xad

Created: 3/06/2023 4:21:53 PM  
Modified: 3/06/2023 4:21:53 PM

Electrophoresis File Run Summary

Sample #1: CC1

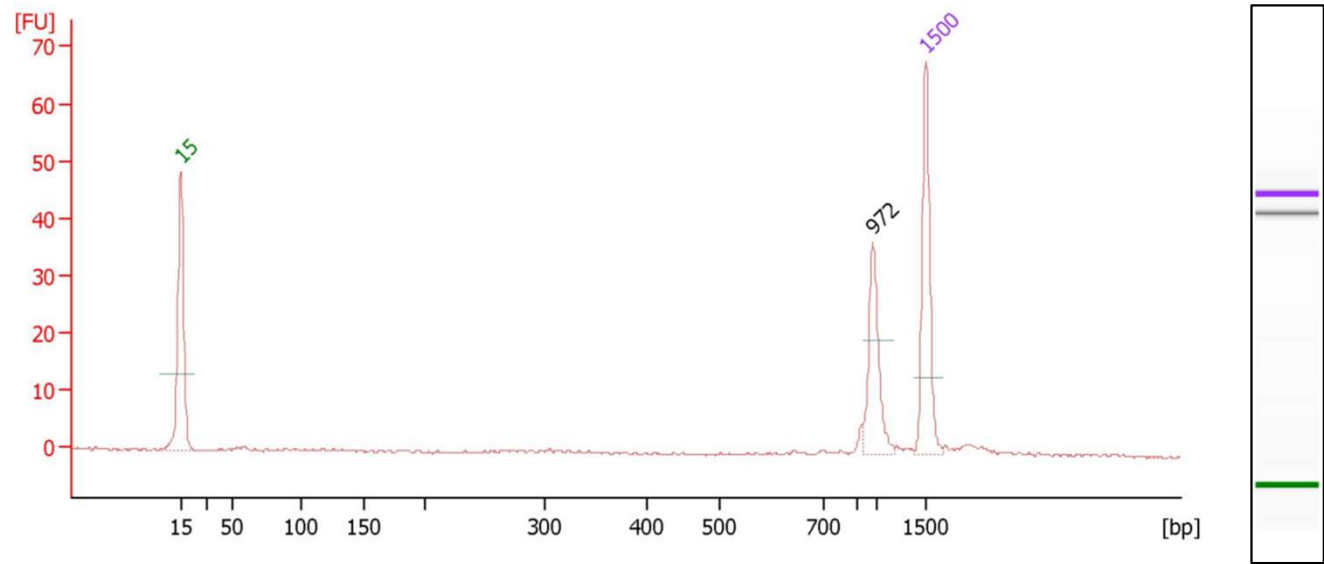

Peak table for Sample #1 :

| Peak | Size [bp] | Conc. [ng/μl] | Molarity [nmol/l] | Observations |
|------|-----------|---------------|-------------------|--------------|
| 1    | 15        | 4.20          | 424.4             | Lower Marker |
| 2    | 972       | 1.63          | 2.5               | Ladder Peak  |
| 3    | 1,500     | 2.10          | 2.2               | Upper Marker |

Assay Class: DNA 1000  
Data Path: C:\...-30\2100\_expert\_DNA 1000\_DE34903611\_2023-03-06\_TRN\_1\_10.xad

Created: 3/06/2023 4:21:53 PM  
Modified: 3/06/2023 4:21:53 PM

Electrophoresis File Run Summary

Sample #2: CC2

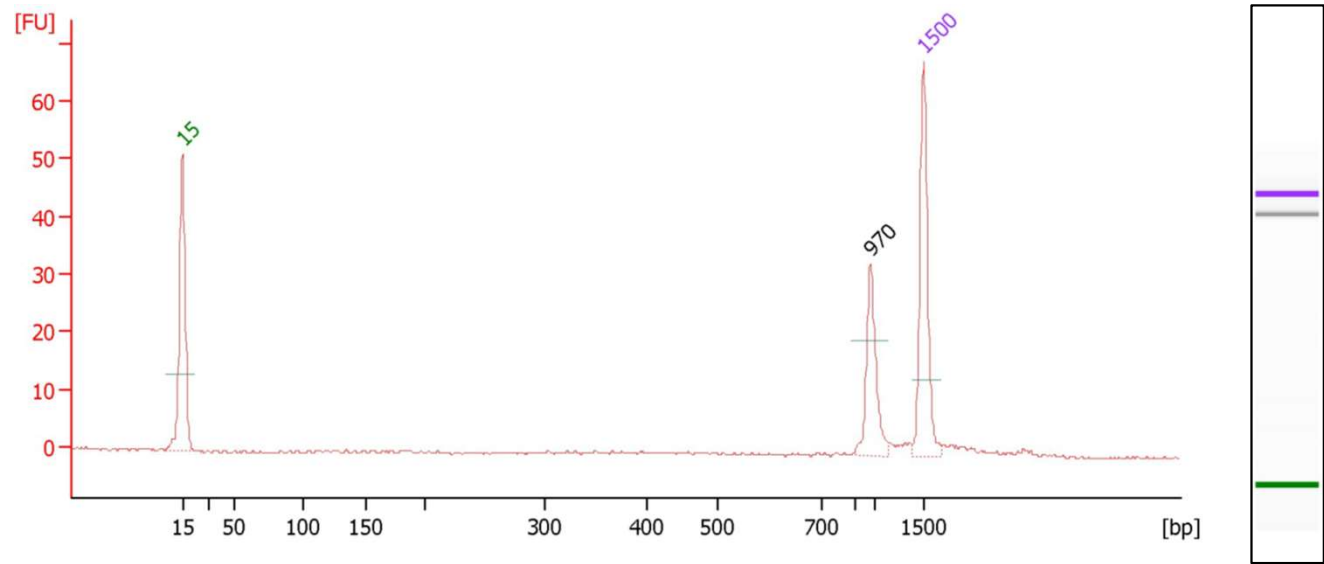

Peak table for Sample #2 :

| Peak | Size [bp] | Conc. [ng/μl] | Molarity [nmol/l] | Observations |
|------|-----------|---------------|-------------------|--------------|
| 1    | 15        | 4.20          | 424.4             | Lower Marker |
| 2    | 970       | 1.41          | 2.2               | Ladder Peak  |
| 3    | 1,500     | 2.10          | 2.2               | Upper Marker |

Assay Class: DNA 1000  
Data Path: C:\...-30\2100\_expert\_DNA 1000\_DE34903611\_2023-03-06\_TRN\_1\_10.xad

Created: 3/06/2023 4:21:53 PM  
Modified: 3/06/2023 4:21:53 PM

Electrophoresis File Run Summary

Sample #3: CA1

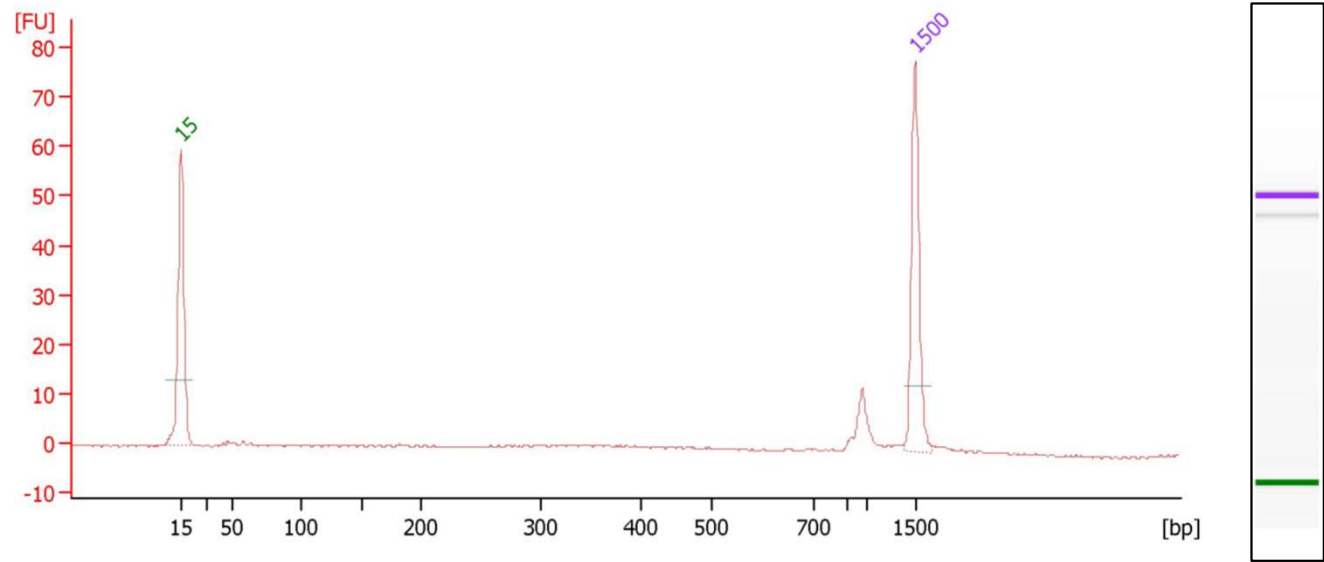

Peak table for Sample #3 :

| Peak | Size [bp] | Conc. [ng/μl] | Molarity [nmol/l] | Observations |
|------|-----------|---------------|-------------------|--------------|
| 1    | 15        | 4.20          | 424.4             | Lower Marker |
| 2    | 1,500     | 2.10          | 2.1               | Upper Marker |

Assay Class: DNA 1000  
Data Path: C:\...-30\2100 expert\_DNA 1000\_DE34903611\_2023-03-06\_TRN\_1\_10.xad

Created: 3/06/2023 4:21:53 PM  
Modified: 3/06/2023 4:21:53 PM

Electrophoresis File Run Summary

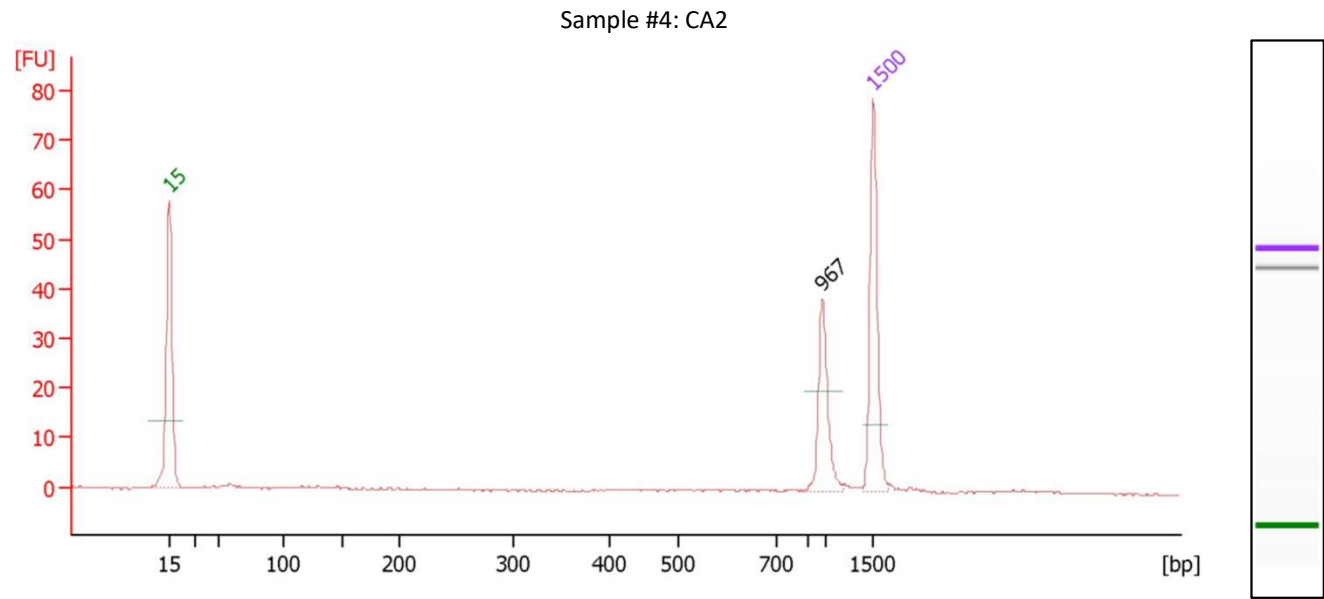

Peak table for Sample #4 :

| Peak | Size [bp] | Conc. [ng/μl] | Molarity [nmol/l] | Observations |
|------|-----------|---------------|-------------------|--------------|
| 1    | 15        | 4.20          | 424.2             | Lower Marker |
| 2    | 967       | 1.43          | 2.2               | Ladder Peak  |
| 3    | 1,500     | 2.10          | 2.1               | Upper Marker |

Assay Class: DNA 1000  
Data Path: C:\...-30\2100\_expert\_DNA 1000\_DE34903611\_2023-03-06\_TRN\_1\_10.xad

Created: 3/06/2023 4:21:53 PM  
Modified: 3/06/2023 4:21:53 PM

Electrophoresis File Run Summary

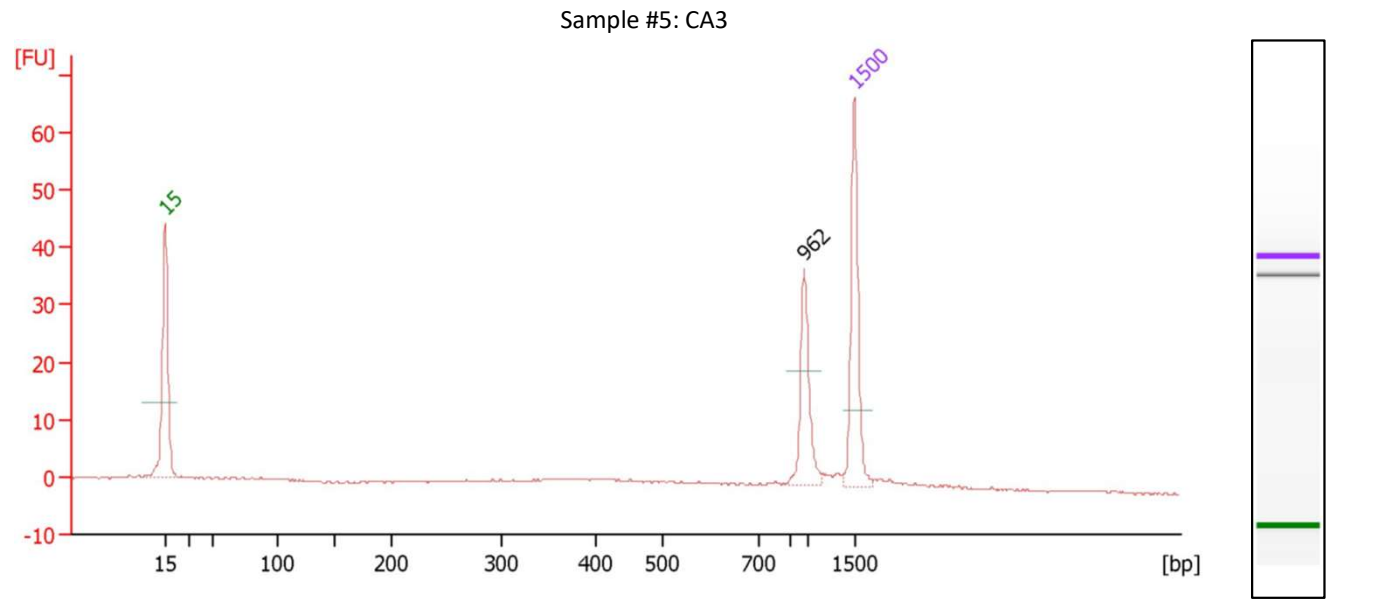

Peak table for Sample #5 :

| Peak | Size [bp] | Conc. [ng/μl] | Molarity [nmol/l] | Observations |
|------|-----------|---------------|-------------------|--------------|
| 1    | 15        | 4.20          | 424.2             | Lower Marker |
| 2    | 962       | 1.58          | 2.5               | Ladder Peak  |
| 3    | 1,500     | 2.10          | 2.1               | Upper Marker |

Assay Class: DNA 1000  
Data Path: C:\...-30\2100\_expert\_DNA 1000\_DE34903611\_2023-03-06\_TRN\_1\_10.xad

Created: 3/06/2023 4:21:53 PM  
Modified: 3/06/2023 4:21:53 PM

Electrophoresis File Run Summary

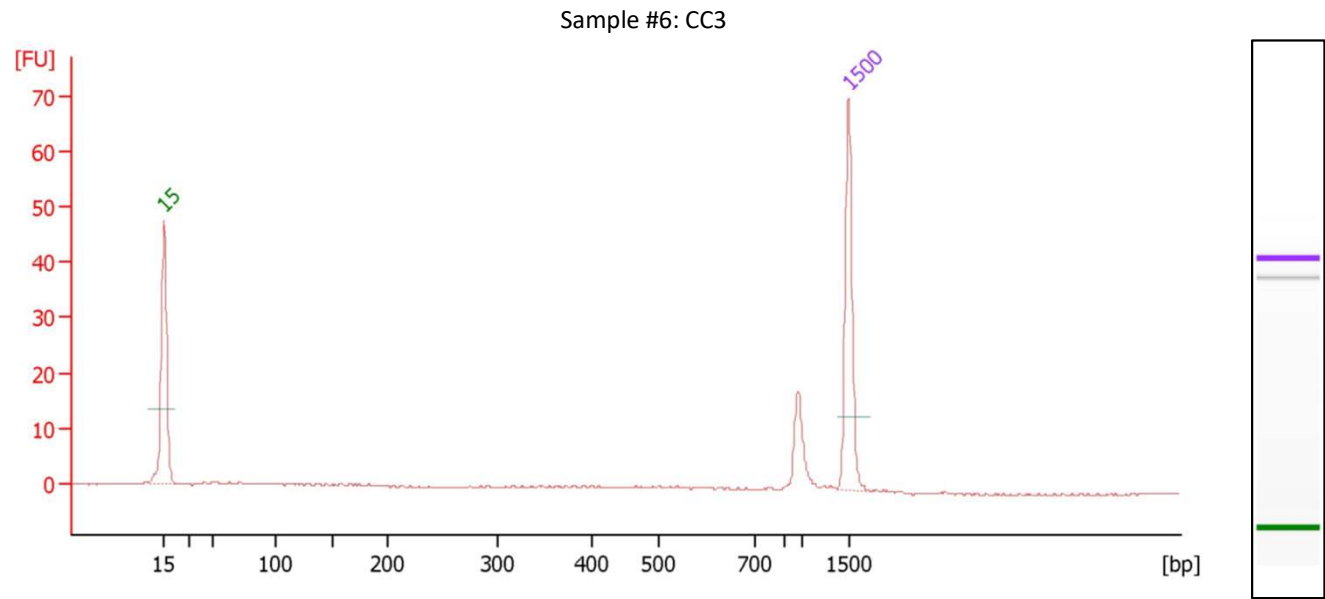

Peak table for Sample #6 :

| Peak | Size [bp] | Conc. [ng/μl] | Molarity [nmol/l] | Observations |
|------|-----------|---------------|-------------------|--------------|
| 1    | 15        | 4.20          | 424.4             | Lower Marker |
| 2    | 1,500     | 2.10          | 2.1               | Upper Marker |

Assay Class: DNA 1000  
Data Path: C:\...-30\2100 expert\_DNA 1000\_DE34903611\_2023-03-06\_TRN\_1\_10.xad

Created: 3/06/2023 4:21:53 PM  
Modified: 3/06/2023 4:21:53 PM

Electrophoresis File Run Summary

Sample #7: CC4

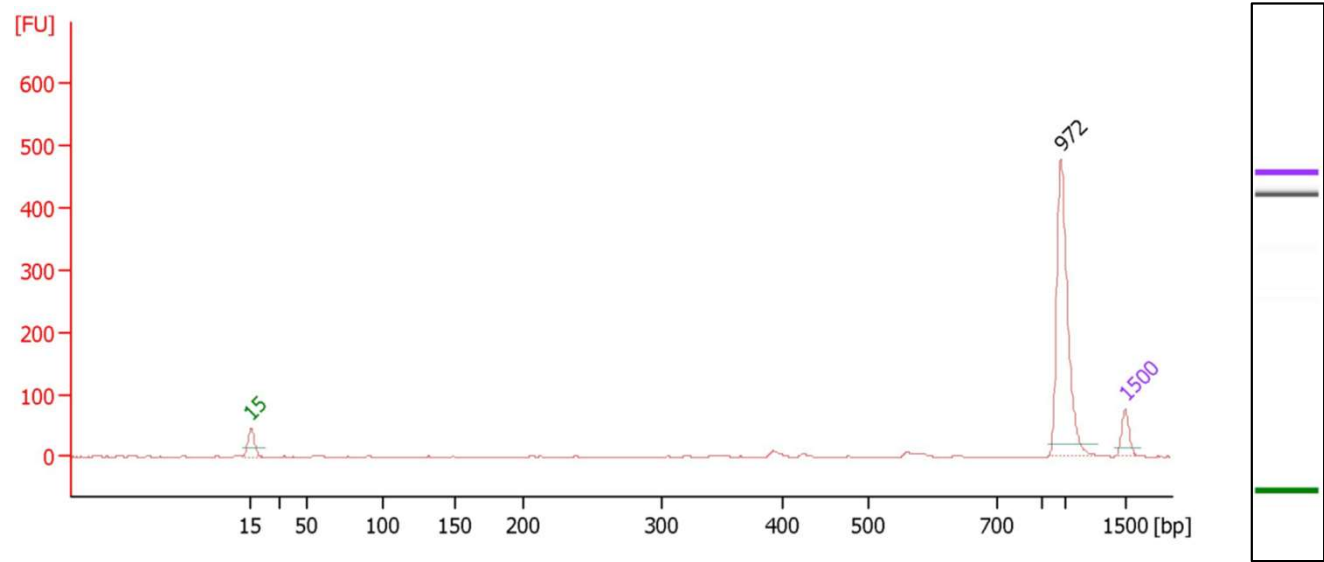

Peak table for Sample #7 :

| Peak | Size [bp] | Conc. [ng/μl] | Molarity [nmol/l] | Observations |
|------|-----------|---------------|-------------------|--------------|
| 1    | 15        | 4.20          | 424.4             | Lower Marker |
| 2    | 972       | 20.68         | 32.2              | Ladder Peak  |
| 3    | 1,500     | 2.10          | 2.2               | Upper Marker |

Assay Class: DNA 1000  
Data Path: C:\...-30\2100\_expert\_DNA 1000\_DE34903611\_2023-03-06\_TRN\_1\_10.xad

Created: 3/06/2023 4:21:53 PM  
Modified: 3/06/2023 4:21:53 PM

Electrophoresis File Run Summary

Sample #8: CA4

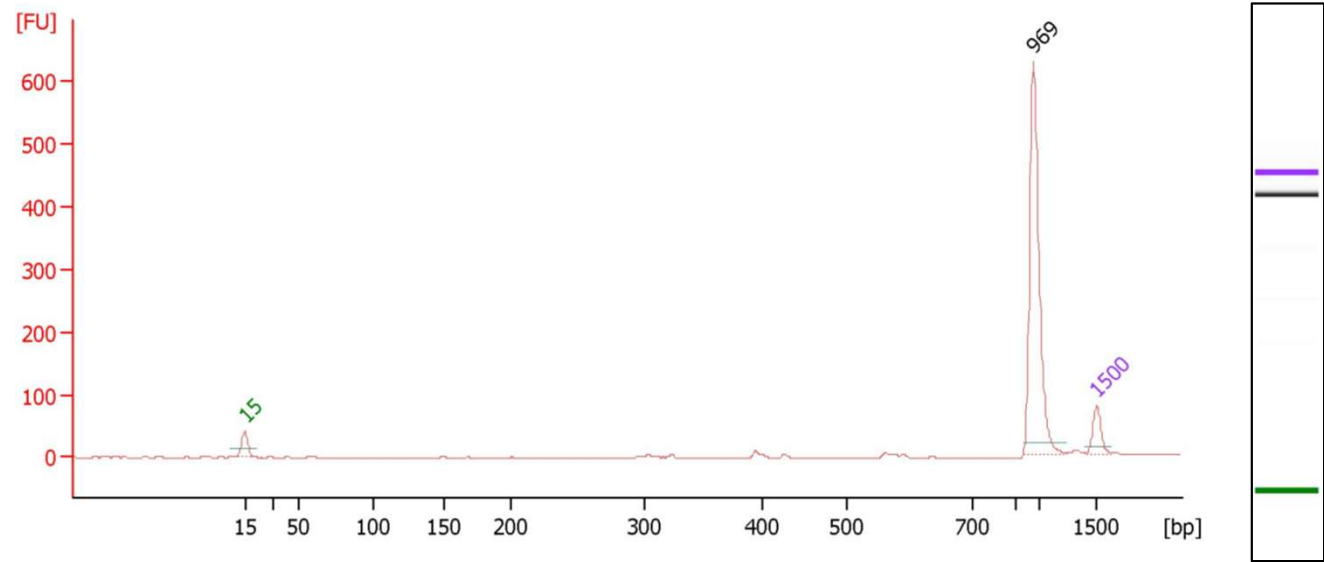

Peak table for Sample #8 :

| Peak | Size [bp] | Conc. [ng/μl] | Molarity [nmol/l] | Observations |
|------|-----------|---------------|-------------------|--------------|
| 1    | 15        | 4.20          | 424.4             | Lower Marker |
| 2    | 969       | 20.84         | 32.6              | Ladder Peak  |
| 3    | 1,500     | 2.10          | 2.2               | Upper Marker |

Assay Class: DNA 1000  
Data Path: C:\...-30\2100 expert\_DNA 1000\_DE34903611\_2023-03-06\_TRN\_1\_10.xad

Created: 3/06/2023 4:21:53 PM  
Modified: 3/06/2023 4:21:53 PM

Electrophoresis File Run Summary

Sample #9: CA5

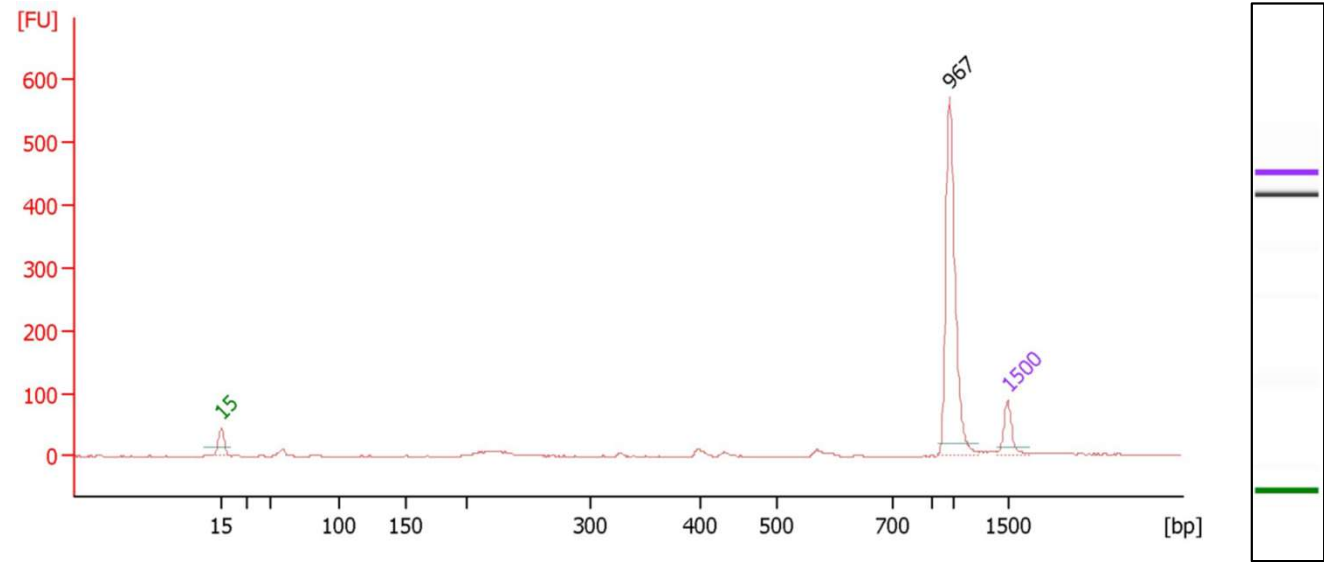

Peak table for Sample #9 :

| Peak | Size [bp] | Conc. [ng/μl] | Molarity [nmol/l] | Observations |
|------|-----------|---------------|-------------------|--------------|
| 1    | 15        | 4.20          | 424.4             | Lower Marker |
| 2    | 967       | 16.84         | 26.4              | Ladder Peak  |
| 3    | 1,500     | 2.10          | 2.2               | Upper Marker |

Assay Class: DNA 1000  
Data Path: C:\...-30\2100 expert\_DNA 1000\_DE34903611\_2023-03-06\_TRN\_1\_10.xad

Created: 3/06/2023 4:21:53 PM  
Modified: 3/06/2023 4:21:53 PM

Electrophoresis File Run Summary

Sample #10: CA6

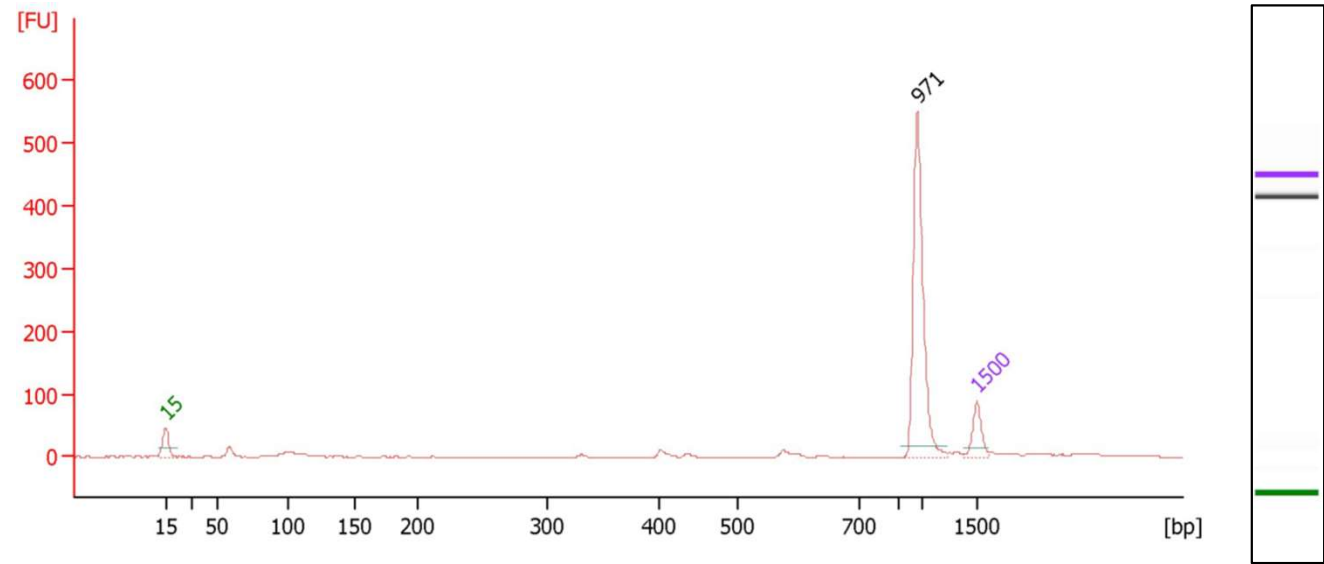

Peak table for Sample #10 :

| Peak | Size [bp] | Conc. [ng/μl] | Molarity [nmol/l] | Observations |
|------|-----------|---------------|-------------------|--------------|
| 1    | 15        | 4.20          | 424.4             | Lower Marker |
| 2    | 962       | 15.46         | 24.5              | Ladder Peak  |
| 3    | 1,500     | 2.10          | 2.1               | Upper Marker |

Assay Class: DNA 1000  
Data Path: C:\...-30\2100\_expert\_DNA 1000\_DE34903611\_2023-03-06\_TRN\_1\_10.xad

Created: 3/06/2023 4:21:53 PM  
Modified: 3/06/2023 4:21:53 PM

Electrophoresis File Run Summary

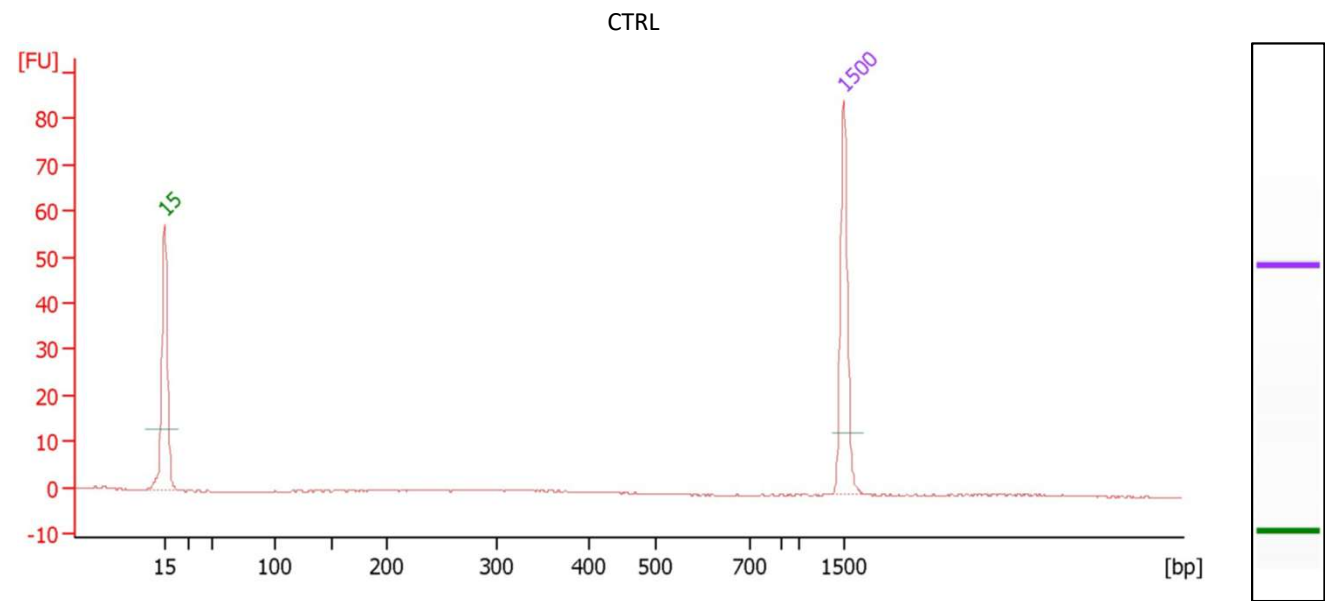

Peak table for Sample CTRL :

| Peak | Size [bp] | Conc. [ng/μl] | Molarity [nmol/l] | Observations |
|------|-----------|---------------|-------------------|--------------|
| 1    | 15        | 4.20          | 424.4             | Lower Marker |
| 2    | 1,500     | 2.10          | 2.2               | Upper Marker |

Assay Class: DNA 1000  
Data Path: C:\...-30\2100\_expert\_DNA 1000\_DE34903611\_2023-03-06\_TRN\_1\_10.xad

Created: 3/06/2023 4:21:53 PM  
Modified: 3/06/2023 4:21:53 PM

Electrophoresis File Run Summary

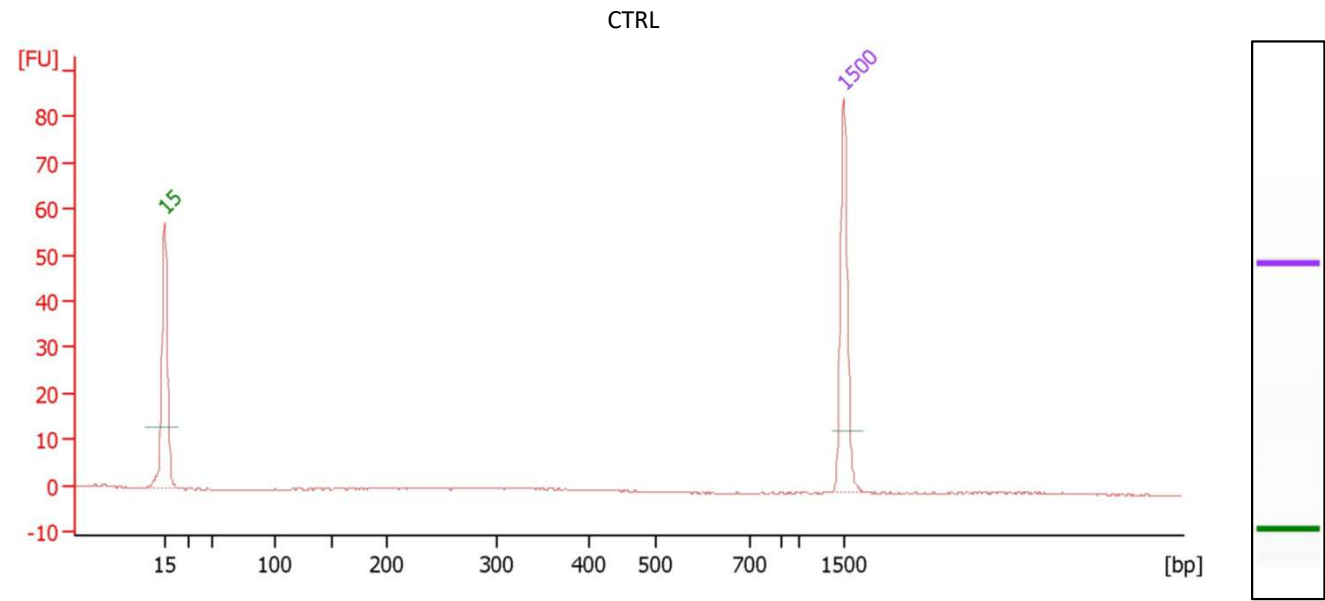

Peak table for Sample CTRL :

| Peak | Size [bp] | Conc. [ng/μl] | Molarity [nmol/l] | Observations |
|------|-----------|---------------|-------------------|--------------|
| 1    | 15        | 4.20          | 424.4             | Lower Marker |
| 2    | 1,500     | 2.10          | 2.1               | Upper Marker |

Assay Class: DNA 1000  
Data Path: C:\...-30\2100\_expert\_DNA 1000\_DE34903611\_2023-03-06\_TRN\_1\_10.xad

Created: 3/06/2023 4:21:53 PM  
Modified: 3/06/2023 4:21:53 PM

Curves

Standard Curve

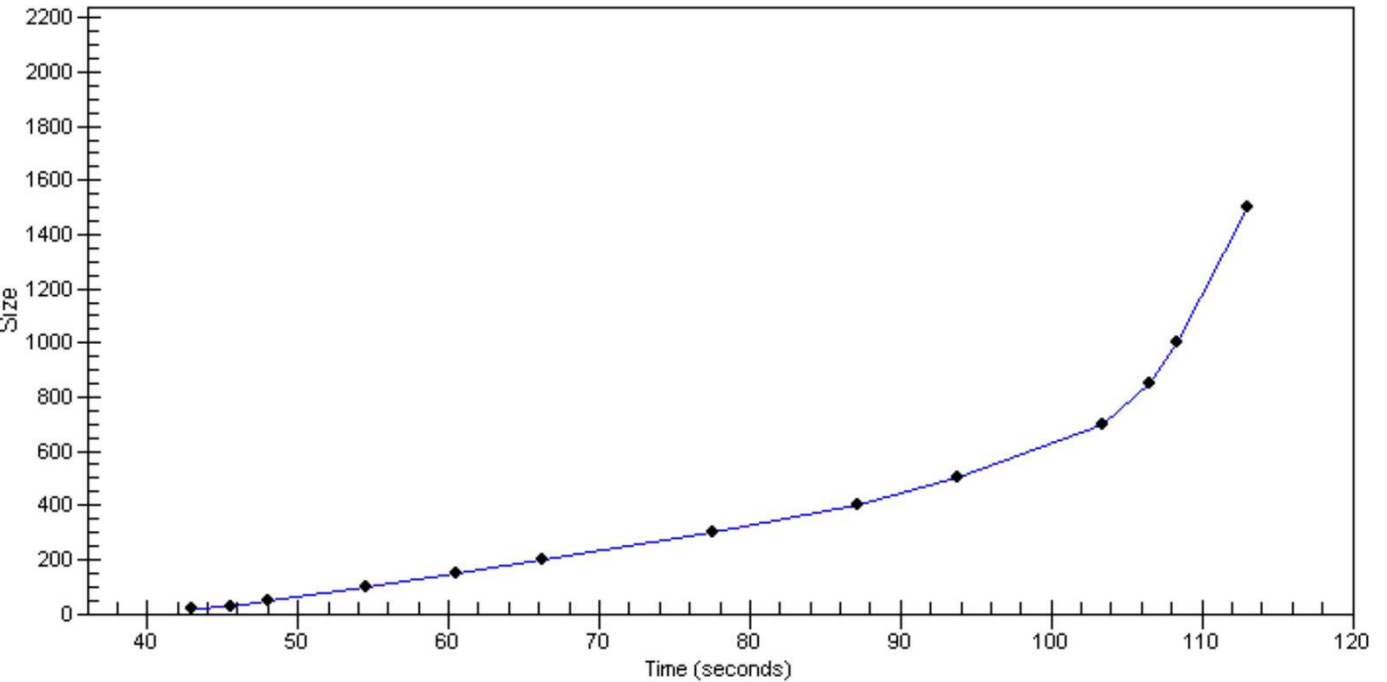

Assay Class: DNA 1000  
Data Path: C:\...-30\2100\_expert\_DNA\_1000\_DE34903611\_2023-03-06\_TRN\_1\_10.xad

Created: 3/06/2023 4:21:53 PM  
Modified: 3/06/2023 4:21:53 PM

Electrophoresis File Run Summary (Chip Summary)

| Sample Name | Sample Content | Rest. Digest             | Status | Observation | Result Label | Result Color |
|-------------|----------------|--------------------------|--------|-------------|--------------|--------------|
| Sample #1   |                | <input type="checkbox"/> | ✓      |             |              |              |
| Sample #2   |                | <input type="checkbox"/> | ✓      |             |              |              |
| Sample #3   |                | <input type="checkbox"/> | ✓      |             |              |              |
| Sample #4   |                | <input type="checkbox"/> | ✓      |             |              |              |
| Sample #5   |                | <input type="checkbox"/> | ✓      |             |              |              |
| Sample #6   |                | <input type="checkbox"/> | ✓      |             |              |              |
| Sample #7   |                | <input type="checkbox"/> | ✓      |             |              |              |
| Sample #8   |                | <input type="checkbox"/> | ✓      |             |              |              |
| Sample #9   |                | <input type="checkbox"/> | ✓      |             |              |              |
| Sample #10  |                | <input type="checkbox"/> | ✓      |             |              |              |
| CTRL        |                | <input type="checkbox"/> | ✓      |             |              |              |
| CTRL        |                | <input type="checkbox"/> | ✓      |             |              |              |

Chip Lot #

Reagent Kit Lot #

Chip Comments :

Assay Class: DNA 1000  
Data Path: C:\...-30\2100\_expert\_DNA\_1000\_DE34903611\_2023-03-06\_TRN\_1\_10.xad

Created: 3/06/2023 4:21:53 PM  
Modified: 3/06/2023 4:21:53 PM

Electrophoresis Assay Details

General Analysis Settings

Number of Available Sample and Ladder Wells (Max.) : 13  
Minimum Visible Range [s] : 30  
Maximum Visible Range [s] : 129  
Start Analysis Time Range [s] : 30  
End Analysis Time Range [s] : 128.95  
Ladder Concentration [ng/μl] : 44  
Uses Standard Area for Ladder Fragments  
Lower Marker Concentration [ng/μl] : 4.2  
Upper Marker Concentration [ng/μl] : 2.1  
Used Upper Marker for Quantitation  
Standard Curve Fit is Point to Point  
Show Data Aligned to Lower and Upper Marker

Result Label  
Result Color

Integrator Settings

Integration Start Time [s] : 30  
Integration End Time [s] : 128.95  
Slope Threshold : 0.5  
Height Threshold [FU] : 20  
Area Threshold : 0.1  
Width Threshold [s] : 0.5  
Baseline Plateau [s] : 0.5

Filter Settings

Filter Width [s] : 0.5  
Polynomial Order : 4

Ladder

| Ladder Peak | Size | Area |
|-------------|------|------|
| 1           | 15   | 25   |
| 2           | 25   | 26   |
| 3           | 50   | 34   |
| 4           | 100  | 41   |
| 5           | 150  | 45   |
| 6           | 200  | 52   |
| 7           | 300  | 63   |
| 8           | 400  | 76   |
| 9           | 500  | 83   |
| 10          | 700  | 88   |
| 11          | 850  | 86   |
| 12          | 1000 | 90   |
| 13          | 1500 | 52   |

Assay Class: DNA 1000  
Data Path: C:\...-30\2100 expert\_DNA 1000\_DE34903611\_2023-03-06\_TRN\_11\_20.xad  
Created: 3/07/2023 9:17:24 AM  
Modified: 3/07/2023 9:17:24 AM

Electrophoresis File Run Summary

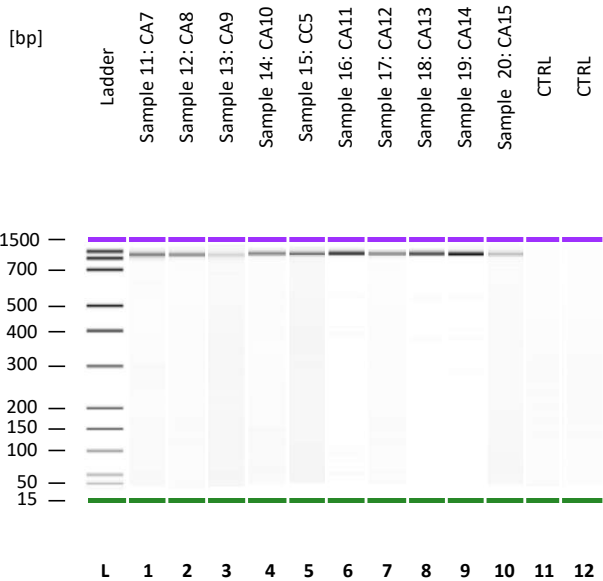

Instrument Information:  
Instrument Name: DE34903611  
Serial #: DE34903611  
Assay Information:  
Assay Origin Path: C:\Program Files\Agilent\2100 bioanalyzer\2100 expert\assays\dsDNA\DNA 1000 Series II.xsy  
Assay Class: DNA 1000  
Version: 2.3  
Assay Comments: DNA Analysis 2 - 1000 bp  
© Copyright 2003-2009 Agilent Technologies, Inc.  
Chip Information:  
Chip Lot #:  
Reagent Kit Lot #:  
Chip Comments:

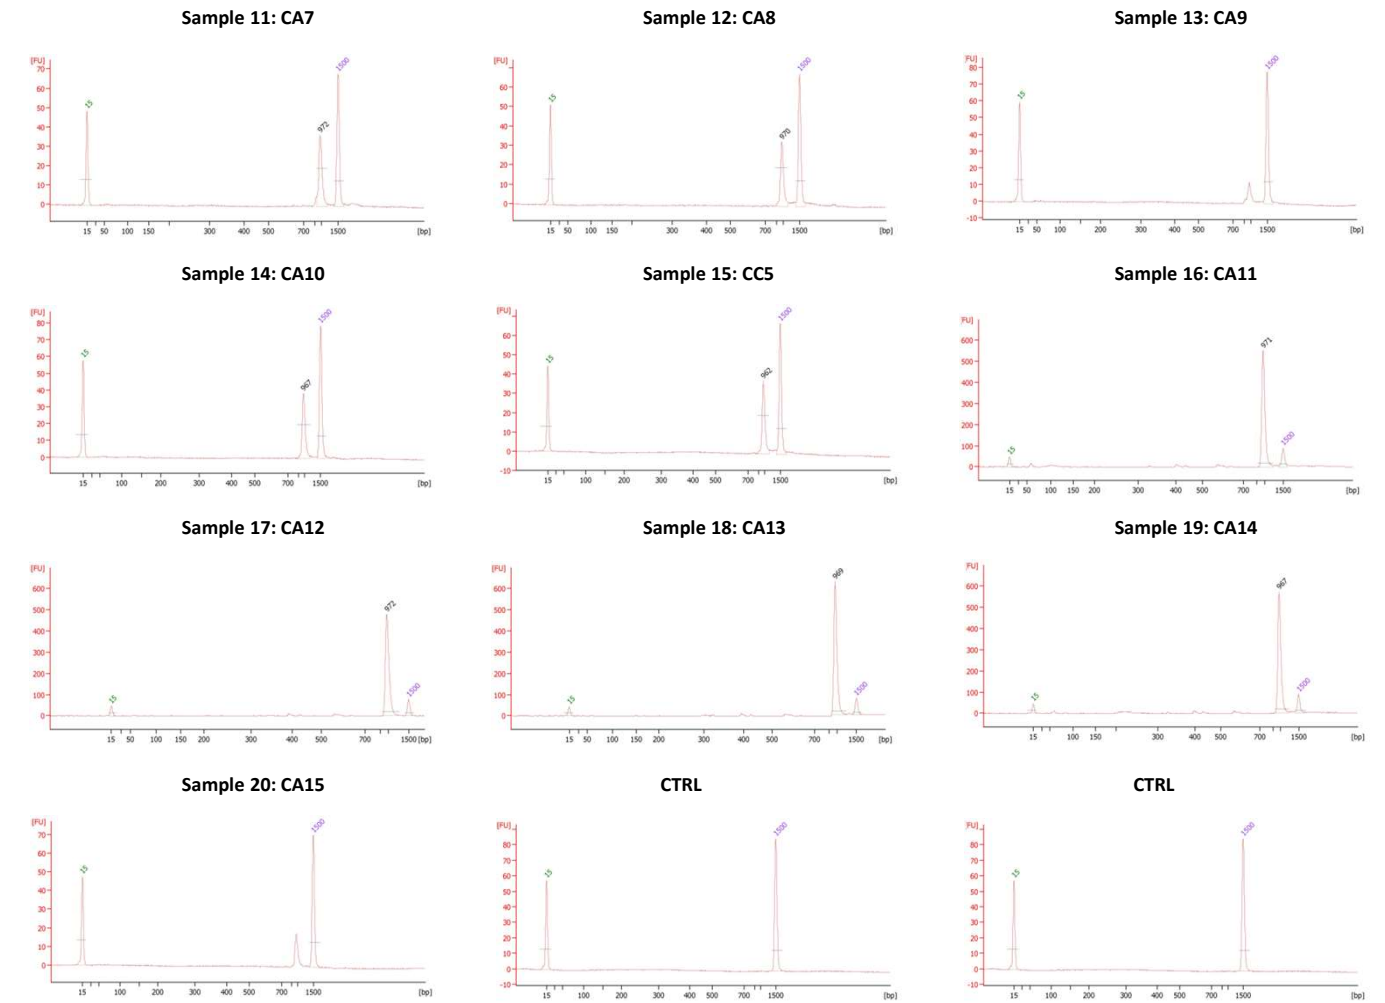

Assay Class: DNA 1000  
Data Path: C:\...-30\2100\_expert\_DNA 1000\_DE34903611\_2023-03-06\_TRN\_11\_20.xad

Created: 3/07/2023 9:17:24 AM  
Modified: 3/07/2023 9:17:24 AM

Electrophoresis File Run Summary

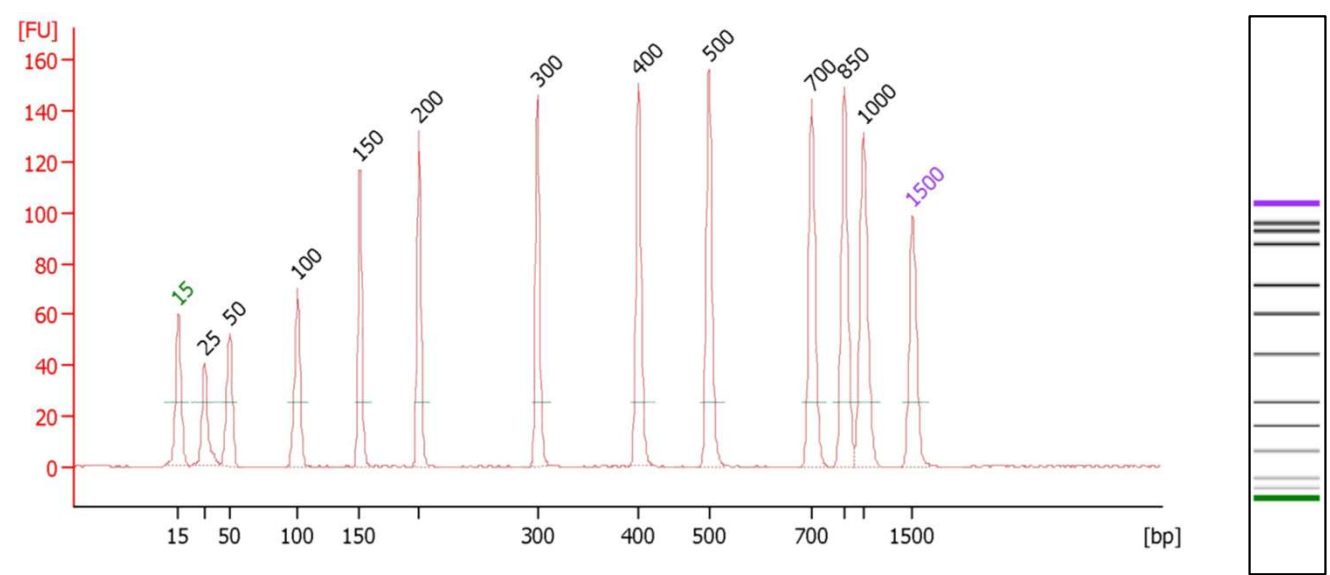

Peak table for Ladder :

| Peak | Size [bp] | Conc. [ng/μl] | Molarity [nmol/l] | Observations |
|------|-----------|---------------|-------------------|--------------|
| 1    | 15        | 4.20          | 4.4.2             | Lower Marker |
| 2    | 25        | 4.00          | 242.4             | Ladder Peak  |
| 3    | 50        | 4.00          | 121.2             | Ladder Peak  |
| 4    | 100       | 4.00          | 60.6              | Ladder Peak  |
| 5    | 150       | 4.00          | 40.3              | Ladder Peak  |
| 6    | 200       | 4.00          | 30.3              | Ladder Peak  |
| 7    | 300       | 4.00          | 20.2              | Ladder Peak  |
| 8    | 400       | 4.00          | 15.2              | Ladder Peak  |
| 9    | 500       | 4.00          | 12.1              | Ladder Peak  |
| 10   | 700       | 4.00          | 8.7               | Ladder Peak  |
| 11   | 850       | 4.00          | 7.1               | Ladder Peak  |
| 12   | 1,000     | 4.00          | 6.1               | Ladder Peak  |
| 13   | 1,500     | 2.10          | 2.1               | Upper Marker |

Assay Class: DNA 1000  
Data Path: C:\...-30\2100\_expert\_DNA 1000\_DE34903611\_2023-03-06\_TRN\_11\_20.xad

Created: 3/07/2023 9:17:24 AM  
Modified: 3/07/2023 9:17:24 AM

Electrophoresis File Run Summary

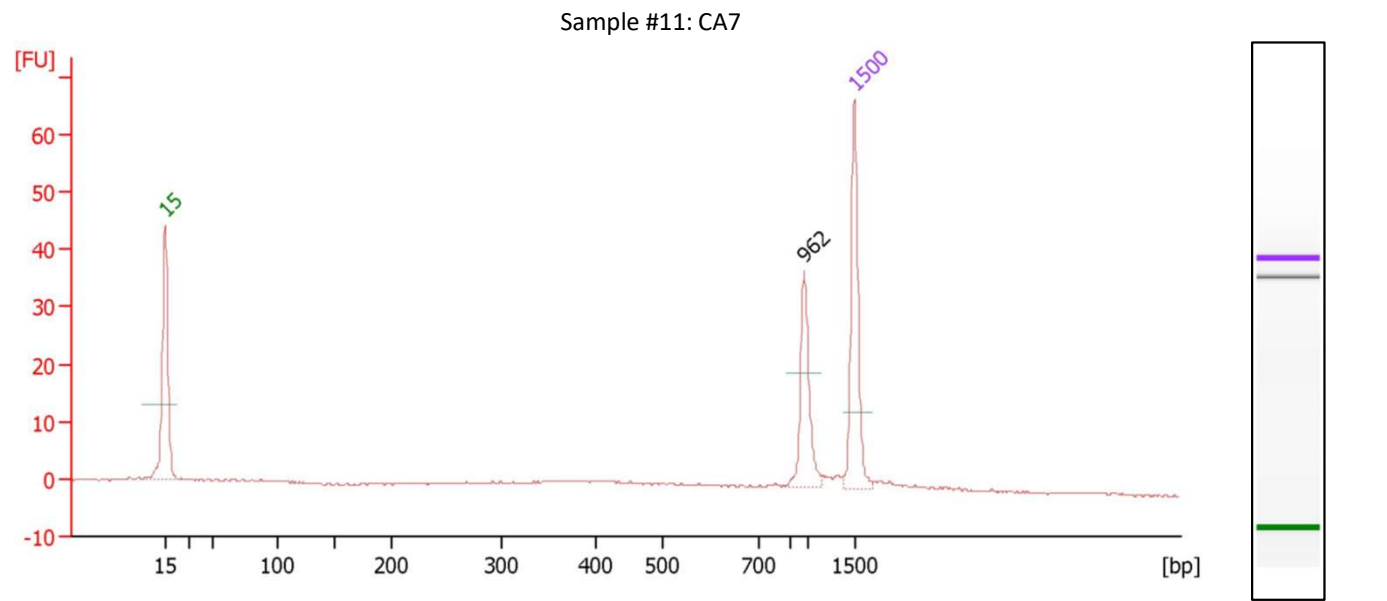

Peak table for Sample #11 :

| Peak | Size [bp] | Conc. [ng/μl] | Molarity [nmol/l] | Observations |
|------|-----------|---------------|-------------------|--------------|
| 1    | 15        | 4.20          | 424.2             | Lower Marker |
| 2    | 962       | 1.58          | 2.5               | Ladder Peak  |
| 3    | 1,500     | 2.10          | 2.1               | Upper Marker |

Assay Class: DNA 1000  
Data Path: C:\...-30\2100 expert\_DNA 1000\_DE34903611\_2023-03-06\_TRN\_11\_20.xad

Created: 3/07/2023 9:17:24 AM  
Modified: 3/07/2023 9:17:24 AM

Electrophoresis File Run Summary

Sample #12: CA8

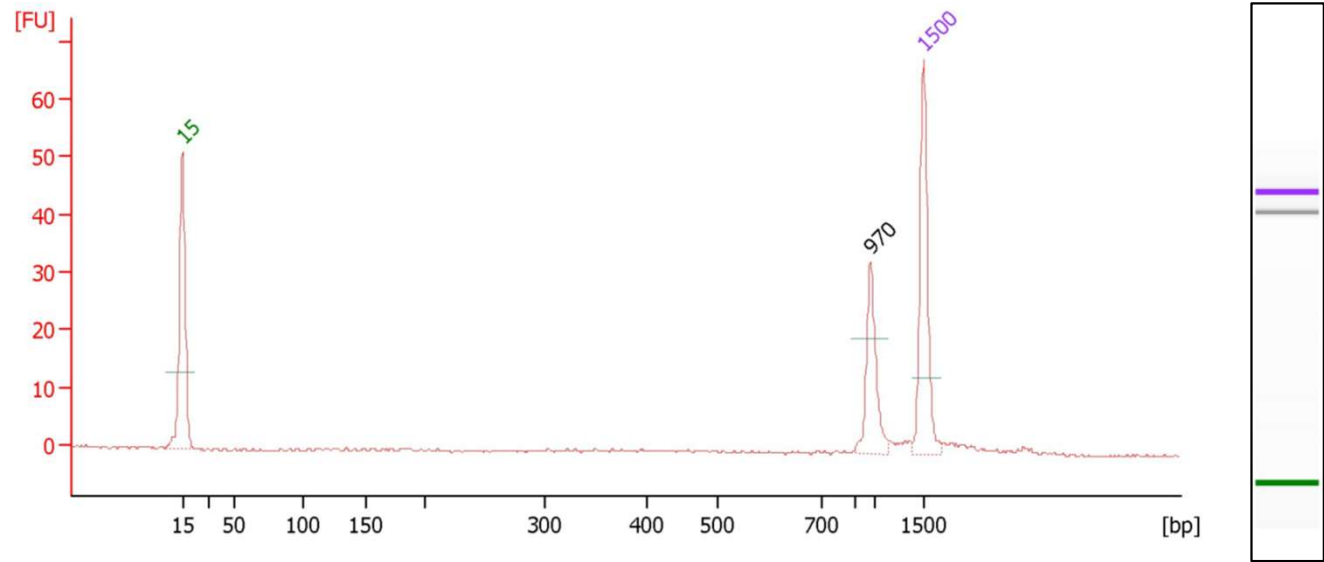

Peak table for Sample #12 :

| Peak | Size [bp] | Conc. [ng/μl] | Molarity [nmol/l] | Observations |
|------|-----------|---------------|-------------------|--------------|
| 1    | 15        | 4.20          | 424.4             | Lower Marker |
| 2    | 970       | 1.41          | 2.2               | Ladder Peak  |
| 3    | 1,500     | 2.10          | 2.2               | Upper Marker |

Assay Class: DNA 1000  
Data Path: C:\...-30\2100\_expert\_DNA 1000\_DE34903611\_2023-03-06\_TRN\_11\_20.xad

Created: 3/07/2023 9:17:24 AM  
Modified: 3/07/2023 9:17:24 AM

Electrophoresis File Run Summary

Sample #13: CA9

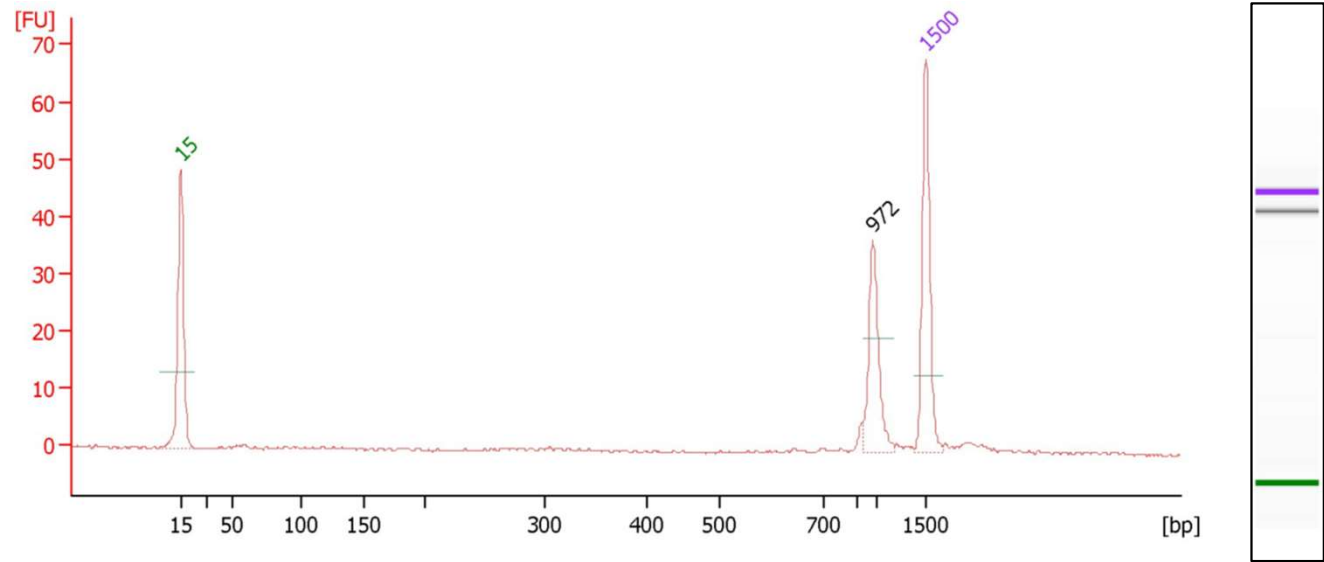

Peak table for Sample #13 :

| Peak | Size [bp] | Conc. [ng/μl] | Molarity [nmol/l] | Observations |
|------|-----------|---------------|-------------------|--------------|
| 1    | 15        | 4.20          | 424.4             | Lower Marker |
| 2    | 972       | 1.63          | 2.5               | Ladder Peak  |
| 3    | 1,500     | 2.10          | 2.2               | Upper Marker |

Assay Class: DNA 1000  
Data Path: C:\...-30\2100\_expert\_DNA 1000\_DE34903611\_2023-03-06\_TRN\_11\_20.xad

Created: 3/07/2023 9:17:24 AM  
Modified: 3/07/2023 9:17:24 AM

Electrophoresis File Run Summary

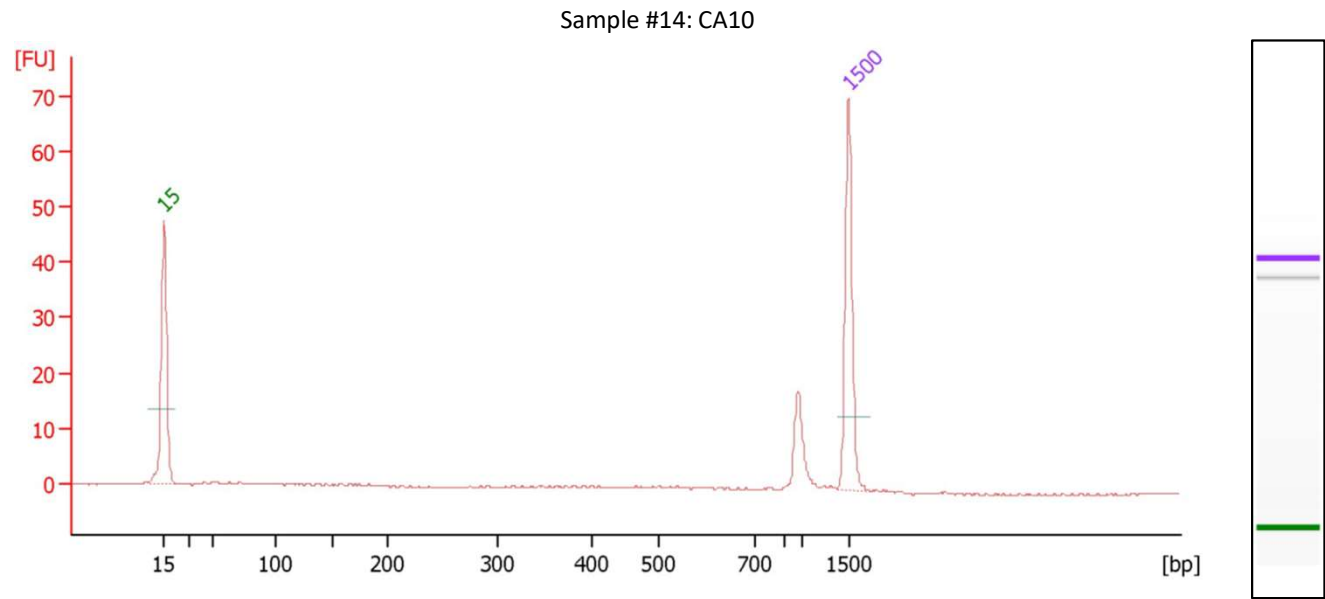

Peak table for Sample #14 :

| Peak | Size [bp] | Conc. [ng/μl] | Molarity [nmol/l] | Observations |
|------|-----------|---------------|-------------------|--------------|
| 1    | 15        | 4.20          | 424.4             | Lower Marker |
| 2    | 1,500     | 2.10          | 2.1               | Upper Marker |

Assay Class: DNA 1000  
Data Path: C:\...-30\2100\_expert\_DNA 1000\_DE34903611\_2023-03-06\_TRN\_11\_20.xad

Created: 3/07/2023 9:17:24 AM  
Modified: 3/07/2023 9:17:24 AM

Electrophoresis File Run Summary

Sample #15: CC5



Peak table for Sample #15 :

| Peak | Size [bp] | Conc. [ng/μl] | Molarity [nmol/l] | Observations |
|------|-----------|---------------|-------------------|--------------|
| 1    | 15        | 4.20          | 424.4             | Lower Marker |
| 2    | 1,500     | 2.10          | 2.1               | Upper Marker |

Assay Class: DNA 1000  
Data Path: C:\...-30\2100 expert\_DNA 1000\_DE34903611\_2023-03-06\_TRN\_11\_20.xad

Created: 3/07/2023 9:17:24 AM  
Modified: 3/07/2023 9:17:24 AM

Electrophoresis File Run Summary

Sample #16: CA11

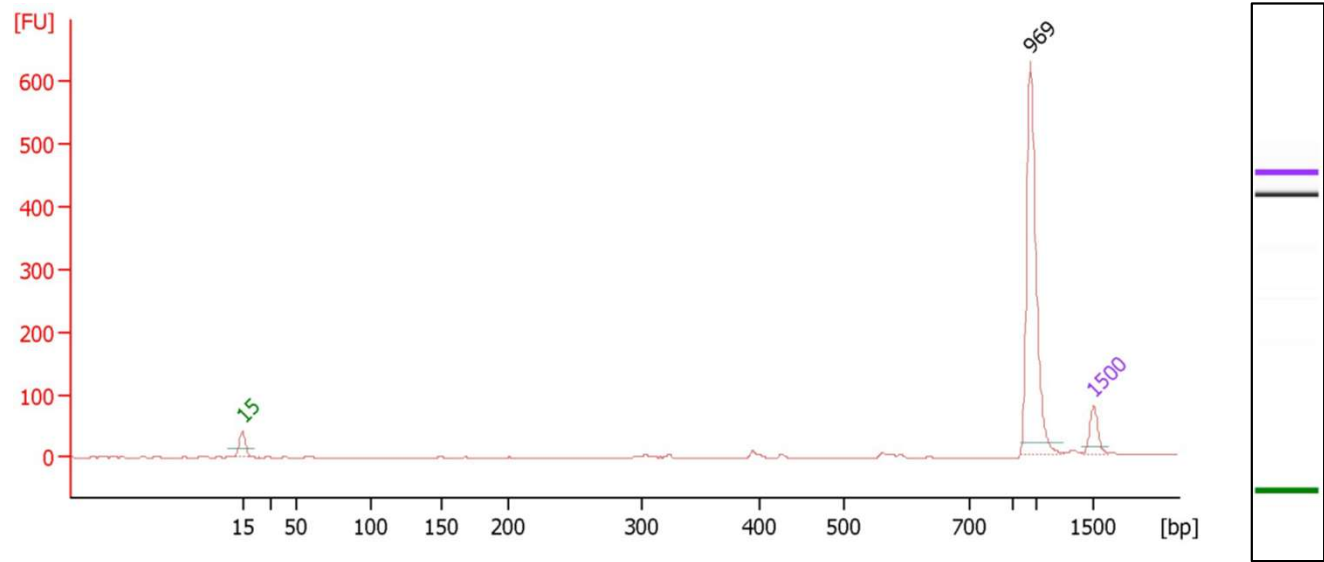

Peak table for Sample #16 :

| Peak | Size [bp] | Conc. [ng/μl] | Molarity [nmol/l] | Observations |
|------|-----------|---------------|-------------------|--------------|
| 1    | 15        | 4.20          | 424.4             | Lower Marker |
| 2    | 969       | 20.84         | 32.6              | Ladder Peak  |
| 3    | 1,500     | 2.10          | 2.2               | Upper Marker |

Assay Class: DNA 1000

Created: 3/07/2023 9:17:24 AM

Data Path: C:\...-30\2100\_expert\_DNA 1000\_DE34903611\_2023-03-06\_TRN\_11\_20.xad

Modified: 3/07/2023 9:17:24 AM

Electrophoresis File Run Summary

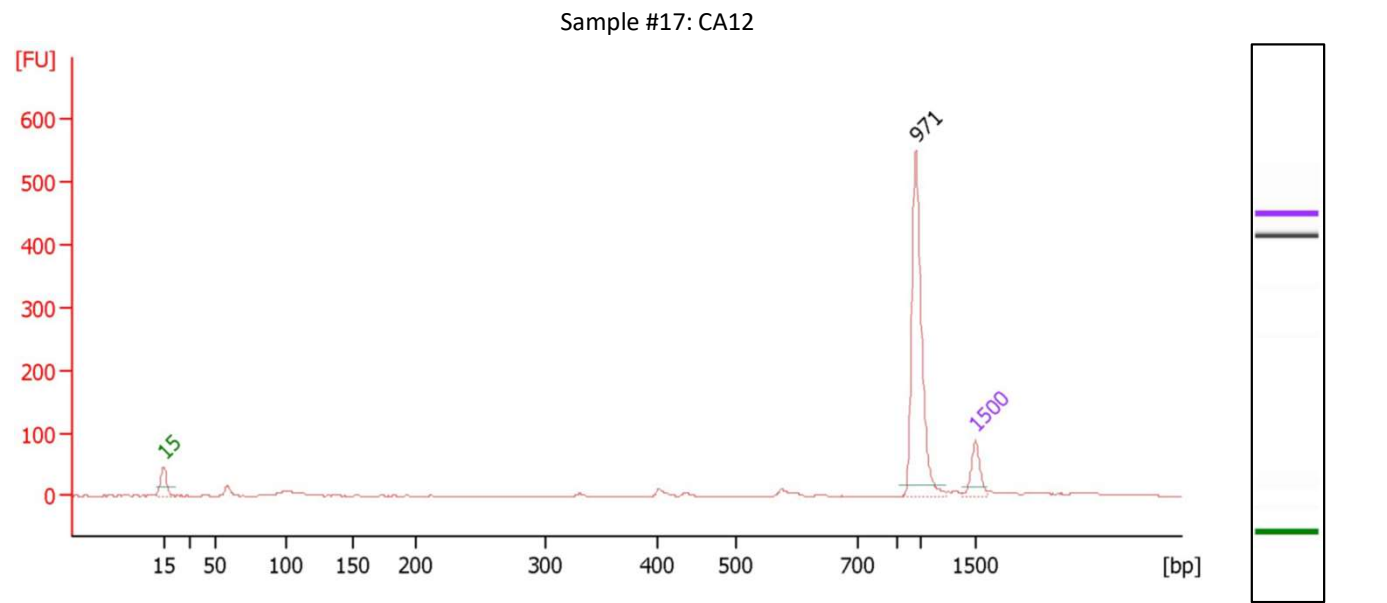

Assay Class: DNA 1000  
Data Path: C:\...-30\2100\_expert\_DNA 1000\_DE34903611\_2023-03-06\_TRN\_11\_20.xad

Created: 3/07/2023 9:17:24 AM  
Modified: 3/07/2023 9:17:24 AM

Electrophoresis File Run Summary

Sample #18: CA13



Peak table for Sample #7 :

| Peak | Size [bp] | Conc. [ng/μl] | Molarity [nmol/l] | Observations |
|------|-----------|---------------|-------------------|--------------|
| 1    | 15        | 4.20          | 424.4             | Lower Marker |
| 2    | 972       | 20.68         | 32.2              | Ladder Peak  |
| 3    | 1,500     | 2.10          | 2.2               | Upper Marker |

Assay Class: DNA 1000  
Data Path: C:\...-30\2100\_expert\_DNA 1000\_DE34903611\_2023-03-06\_TRN\_11\_20.xad

Created: 3/07/2023 9:17:24 AM  
Modified: 3/07/2023 9:17:24 AM

Electrophoresis File Run Summary

Sample #19: CA14



Peak table for Sample #9 :

| Peak | Size [bp] | Conc. [ng/μl] | Molarity [nmol/l] | Observations |
|------|-----------|---------------|-------------------|--------------|
| 1    | 15        | 4.20          | 424.4             | Lower Marker |
| 2    | 967       | 16.84         | 26.4              | Ladder Peak  |
| 3    | 1,500     | 2.10          | 2.2               | Upper Marker |

Assay Class: DNA 1000  
Data Path: C:\...-30\2100 expert\_DNA 1000\_DE34903611\_2023-03-06\_TRN\_11\_20.xad

Created: 3/07/2023 9:17:24 AM  
Modified: 3/07/2023 9:17:24 AM

Electrophoresis File Run Summary

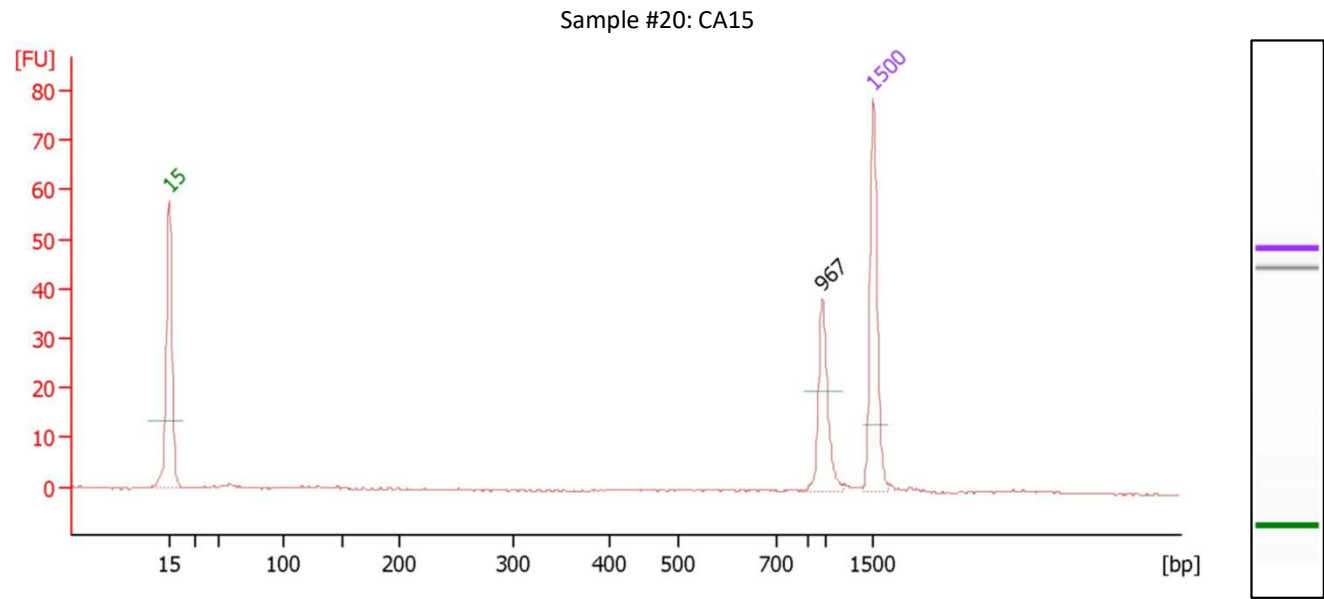

Peak table for Sample #4 :

| Peak | Size [bp] | Conc. [ng/μl] | Molarity [nmol/l] | Observations |
|------|-----------|---------------|-------------------|--------------|
| 1    | 15        | 4.20          | 424.2             | Lower Marker |
| 2    | 967       | 1.43          | 2.2               | Ladder Peak  |
| 3    | 1,500     | 2.10          | 2.1               | Upper Marker |

Assay Class: DNA 1000  
Data Path: C:\...-30\2100\_expert\_DNA 1000\_DE34903611\_2023-03-06\_TRN\_11\_20.xad

Created: 3/07/2023 9:17:24 AM  
Modified: 3/07/2023 9:17:24 AM

Electrophoresis File Run Summary

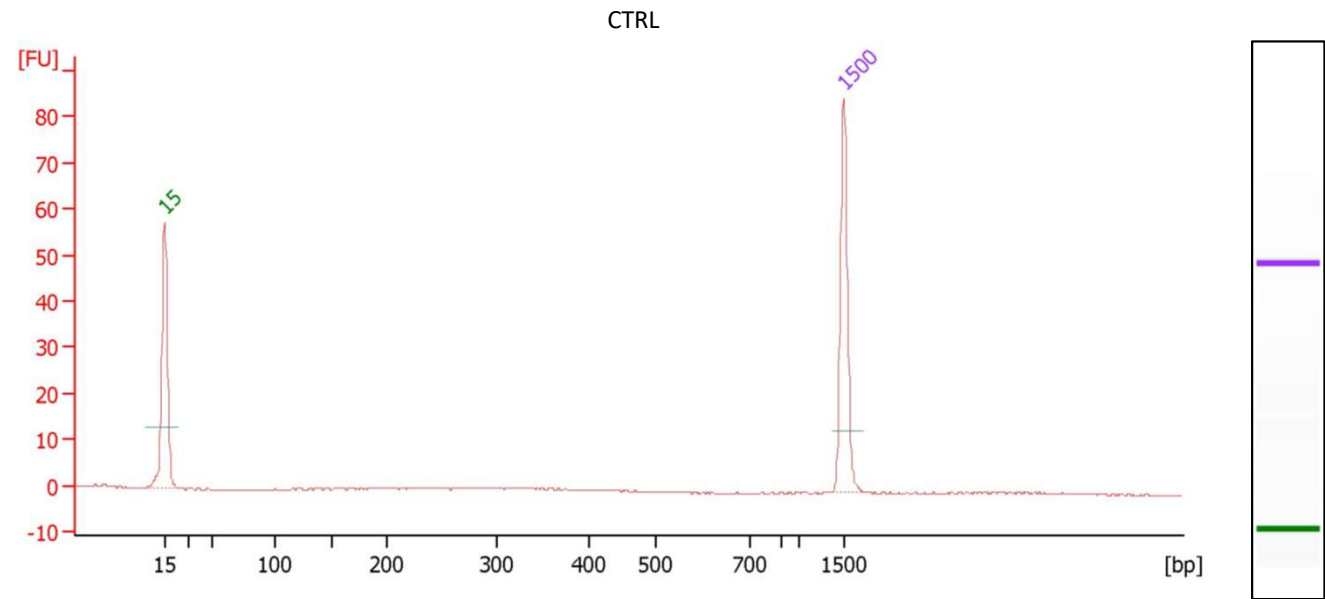

Peak table for Sample CTRL :

| Peak | Size [bp] | Conc. [ng/μl] | Molarity [nmol/l] | Observations |
|------|-----------|---------------|-------------------|--------------|
| 1    | 15        | 4.20          | 424.4             | Lower Marker |
| 2    | 1,500     | 2.10          | 2.2               | Upper Marker |

Assay Class: DNA 1000  
Data Path: C:\...-30\2100 expert\_DNA 1000\_DE34903611\_2023-03-06\_TRN\_11\_20.xad

Created: 3/07/2023 9:17:24 AM  
Modified: 3/07/2023 9:17:24 AM

Electrophoresis File Run Summary

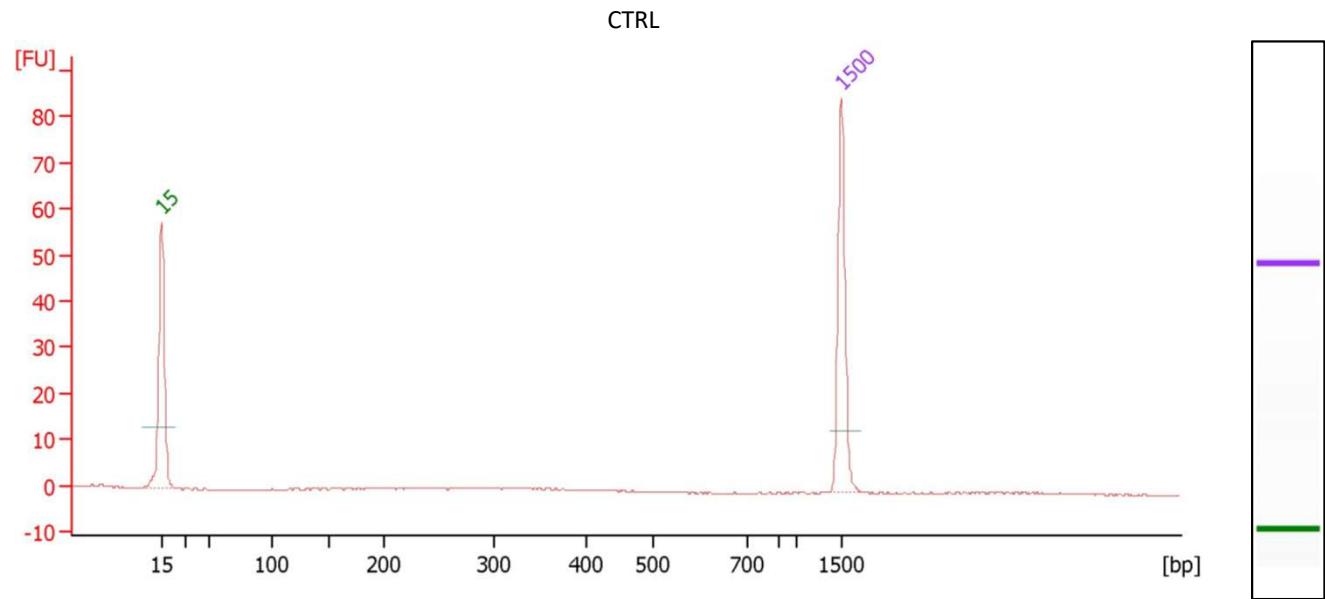

Peak table for Sample CTRL :

| Peak | Size [bp] | Conc. [ng/μl] | Molarity [nmol/l] | Observations |
|------|-----------|---------------|-------------------|--------------|
| 1    | 15        | 4.20          | 424.4             | Lower Marker |
| 2    | 1,500     | 2.10          | 2.1               | Upper Marker |

Assay Class: DNA 1000  
Data Path: C:\...-30\2100\_expert\_DNA 1000\_DE34903611\_2023-03-06\_TRN\_11\_20.xad  
Created: 3/07/2023 9:17:24 AM  
Modified: 3/07/2023 9:17:24 AM

Curves

Standard Curve

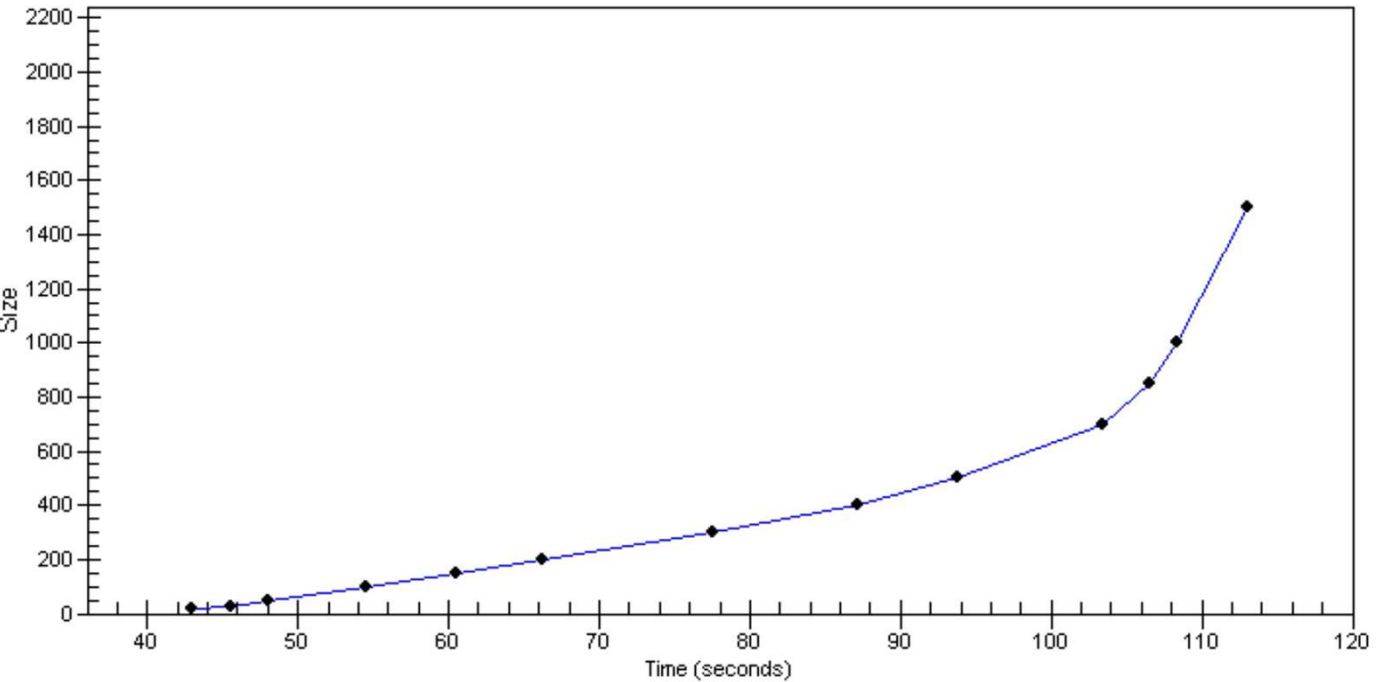

Assay Class: DNA 1000

Data Path: C:\...-30\2100\_expert\_DNA 1000\_DE34903611\_2023-03-06\_TRN\_11\_20.xad

Created: 3/07/2023 9:17:24 AM

Modified: 3/07/2023 9:17:24 AM

Electrophoresis File Run Summary (Chip Summary)

| Sample Name | Sample Content | Rest. Digest             | Status | Observation | Result Label | Result Color |
|-------------|----------------|--------------------------|--------|-------------|--------------|--------------|
| Sample #11  |                | <input type="checkbox"/> | ✓      |             |              |              |
| Sample #12  |                | <input type="checkbox"/> | ✓      |             |              |              |
| Sample #13  |                | <input type="checkbox"/> | ✓      |             |              |              |
| Sample #14  |                | <input type="checkbox"/> | ✓      |             |              |              |
| Sample #15  |                | <input type="checkbox"/> | ✓      |             |              |              |
| Sample #16  |                | <input type="checkbox"/> | ✓      |             |              |              |
| Sample #17  |                | <input type="checkbox"/> | ✓      |             |              |              |
| Sample #18  |                | <input type="checkbox"/> | ✓      |             |              |              |
| Sample #19  |                | <input type="checkbox"/> | ✓      |             |              |              |
| Sample #20  |                | <input type="checkbox"/> | ✓      |             |              |              |
| CTRL        |                | <input type="checkbox"/> | ✓      |             |              |              |
| CTRL        |                | <input type="checkbox"/> | ✓      |             |              |              |

Chip Lot #

Reagent Kit Lot #

Chip Comments :

Assay Class: DNA 1000  
Data Path: C:\...-30\2100\_expert\_DNA\_1000\_DE34903611\_2023-03-06\_TRN\_11\_20.xad

Created: 3/07/2023 9:17:24 AM  
Modified: 3/07/2023 9:17:24 AM

Electrophoresis Assay Details

| General Analysis Settings                               | Result Label | Result Color |
|---------------------------------------------------------|--------------|--------------|
| Number of Available Sample and Ladder Wells (Max.) : 13 |              |              |
| Minimum Visible Range [s] : 30                          |              |              |
| Maximum Visible Range [s] : 129                         |              |              |
| Start Analysis Time Range [s] : 30                      |              |              |
| End Analysis Time Range [s] : 128.95                    |              |              |
| Ladder Concentration [ng/μl] : 44                       |              |              |
| Uses Standard Area for Ladder Fragments                 |              |              |
| Lower Marker Concentration [ng/μl] : 4.2                |              |              |
| Upper Marker Concentration [ng/μl] : 2.1                |              |              |
| Used Upper Marker for Quantitation                      |              |              |
| Standard Curve Fit is Point to Point                    |              |              |
| Show Data Aligned to Lower and Upper Marker             |              |              |

Integrator Settings

Integration Start Time [s] : 30  
Integration End Time [s] : 128.95  
Slope Threshold : 0.5  
Height Threshold [FU] : 20  
Area Threshold : 0.1  
Width Threshold [s] : 0.5  
Baseline Plateau [s] : 0.5

Filter Settings

Filter Width [s] : 0.5  
Polynomial Order : 4

Ladder

| Ladder Peak | Size | Area |
|-------------|------|------|
| 1           | 15   | 25   |
| 2           | 25   | 26   |
| 3           | 50   | 34   |
| 4           | 100  | 41   |
| 5           | 150  | 45   |
| 6           | 200  | 52   |
| 7           | 300  | 63   |
| 8           | 400  | 76   |
| 9           | 500  | 83   |
| 10          | 700  | 88   |
| 11          | 850  | 86   |
| 12          | 1000 | 90   |
| 13          | 1500 | 52   |

Assay Class: DNA 1000

Created: 3/07/2023 9:17:20 PM

Data Path: C:\...-30\2100\_expert\_DNA\_1000\_DE34903611\_2023-03-06\_TRN\_Alul\_1\_10.xad

Modified: 3/07/2023 9:17:20 PM

Electrophoresis File Run Summary

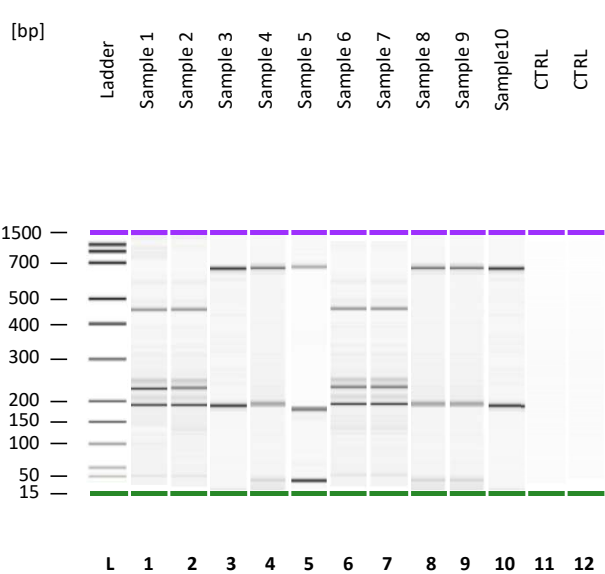

Instrument Information:

Instrument Name: DE34903611

Firmware: C.01.069

Serial #: DE34903611

Type: G2938C

Assay Information:

Assay Origin Path: C:\Program Files\Agilent\2100 bioanalyzer\2100\_expert\assays\dsDNA\DNA 1000 Series II.xsy

Assay Class: DNA 1000

Version: 2.3

Assay Comments: DNA Analysis 2 - 1000 bp

© Copyright 2003-2009 Agilent Technologies, Inc.

Chip Information:

Chip Lot #:

Reagent Kit Lot #:

Chip Comments:

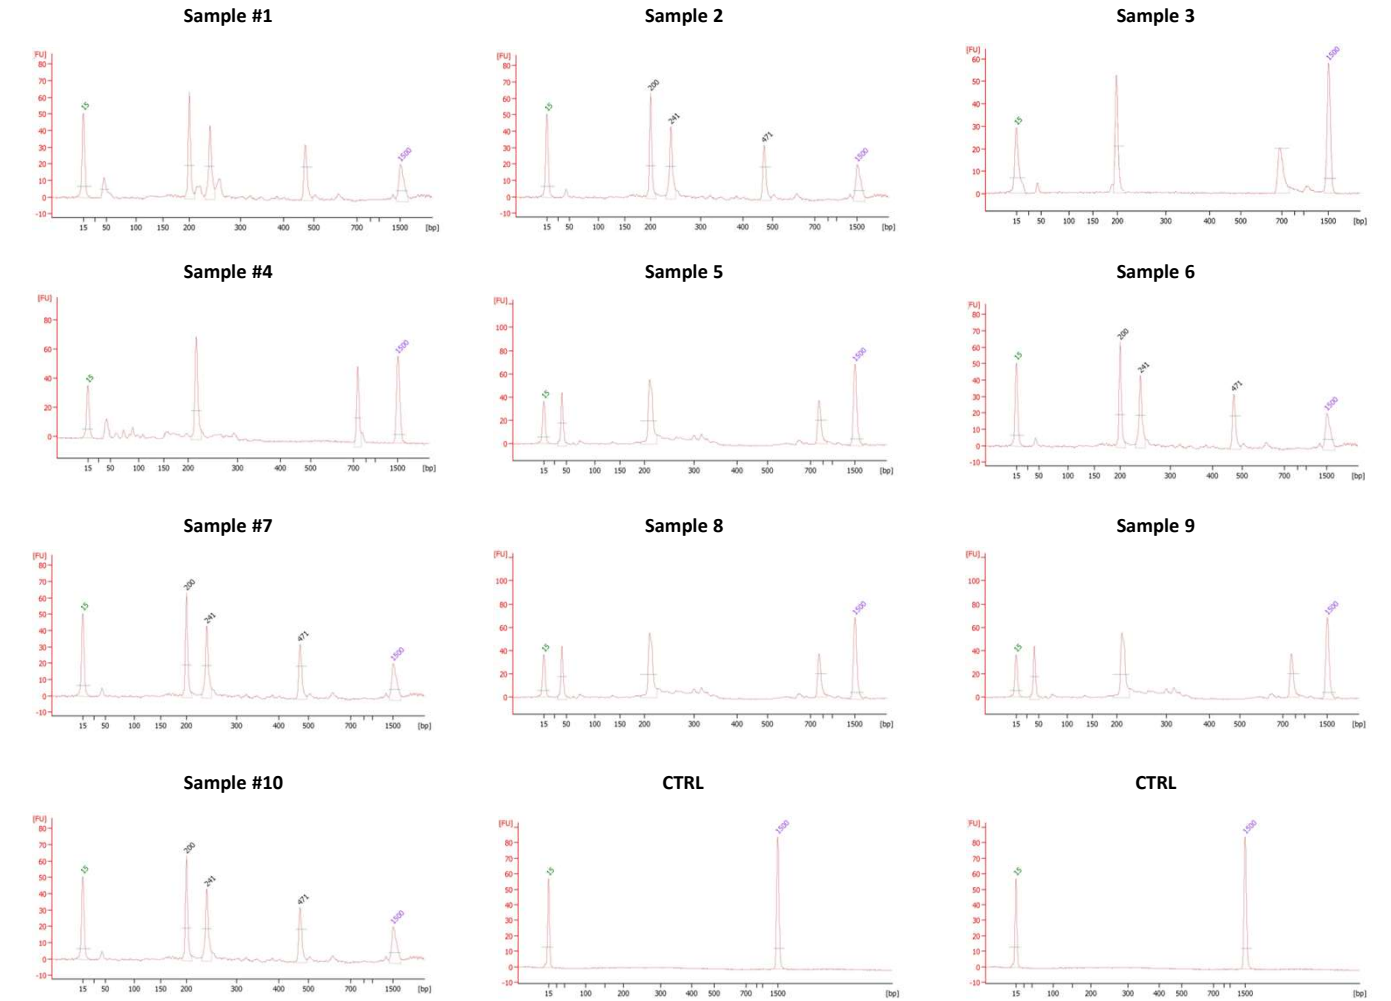

Assay Class: DNA 1000

Created: 3/07/2023 9:17:20 PM

Data Path: C:\...-30\2100\_expert\_DNA 1000\_DE34903611\_2023-03-06\_TRN\_Alul\_1\_10.xad

Modified: 3/07/2023 9:17:20 PM

Electrophoresis File Run Summary



Peak table for Ladder :

| Peak | Size [bp] | Conc. [ng/μl] | Molarity [nmol/l] | Observations |
|------|-----------|---------------|-------------------|--------------|
| 1    | 15        | 4.20          | 4.4.2             | Lower Marker |
| 2    | 25        | 4.00          | 242.4             | Ladder Peak  |
| 3    | 50        | 4.00          | 121.2             | Ladder Peak  |
| 4    | 100       | 4.00          | 60.6              | Ladder Peak  |
| 5    | 150       | 4.00          | 40.3              | Ladder Peak  |
| 6    | 200       | 4.00          | 30.3              | Ladder Peak  |
| 7    | 300       | 4.00          | 20.2              | Ladder Peak  |
| 8    | 400       | 4.00          | 15.2              | Ladder Peak  |
| 9    | 500       | 4.00          | 12.1              | Ladder Peak  |
| 10   | 700       | 4.00          | 8.7               | Ladder Peak  |
| 11   | 850       | 4.00          | 7.1               | Ladder Peak  |
| 12   | 1,000     | 4.00          | 6.1               | Ladder Peak  |
| 13   | 1,500     | 2.10          | 2.1               | Upper Marker |

Assay Class: DNA 1000  
Data Path: C:\...-30\2100\_expert\_DNA 1000\_DE34903611\_2023-03-06\_TRN\_Alul\_1\_10.xad  
Created: 3/07/2023 9:17:20 PM  
Modified: 3/07/2023 9:17:20 PM

Electrophoresis File Run Summary

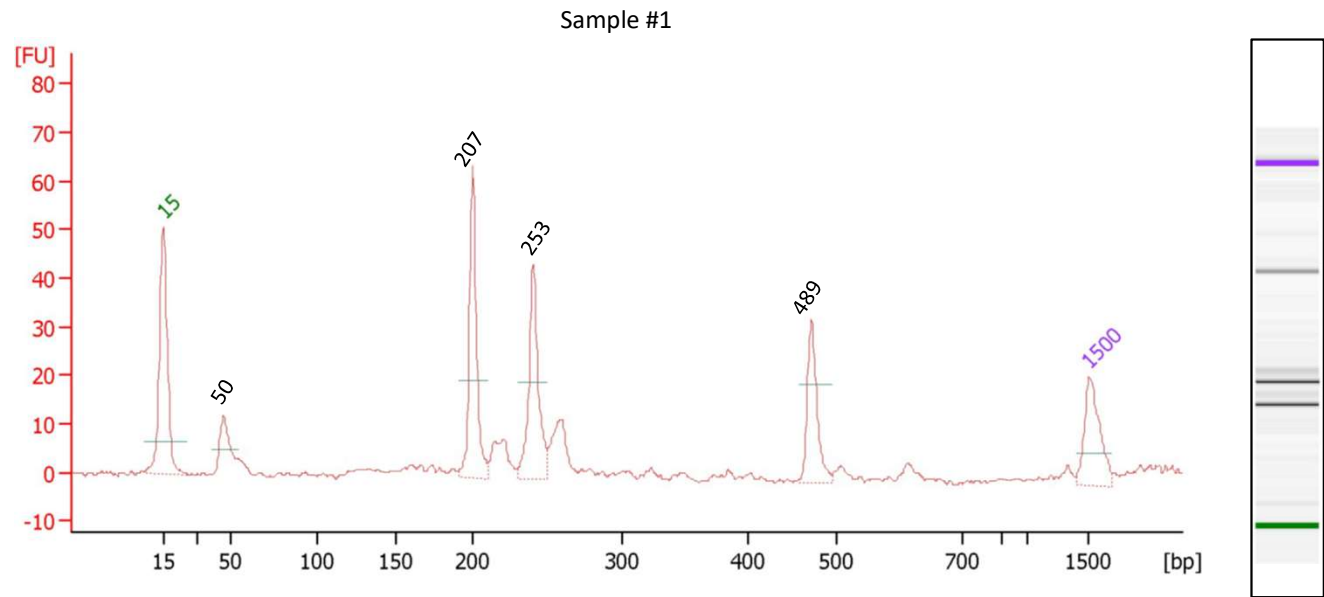

Peak table for Sample #1 :

| Peak | Size [bp] | Conc. [ng/μl] | Molarity [nmol/l] | Observations |
|------|-----------|---------------|-------------------|--------------|
| 1    | 15        | 4.20          | 424.4             | Lower Marker |
| 2    | 50        | 0.63          | 32.5              | Ladder Peak  |
| 3    | 207       | 4.93          | 27.3              | Ladder Peak  |
| 4    | 253       | 3.25          | 7.6               | Ladder Peak  |
| 5    | 489       | 2.07          | 8.4               | Ladder Peak  |
| 6    | 1,500     | 2.10          | 2.2               | Upper Marker |

Assay Class: DNA 1000  
Data Path: C:\...-30\2100\_expert\_DNA 1000\_DE34903611\_2023-03-06\_TRN\_Alul\_1\_10.xad  
Created: 3/07/2023 9:17:20 PM  
Modified: 3/07/2023 9:17:20 PM

Electrophoresis File Run Summary

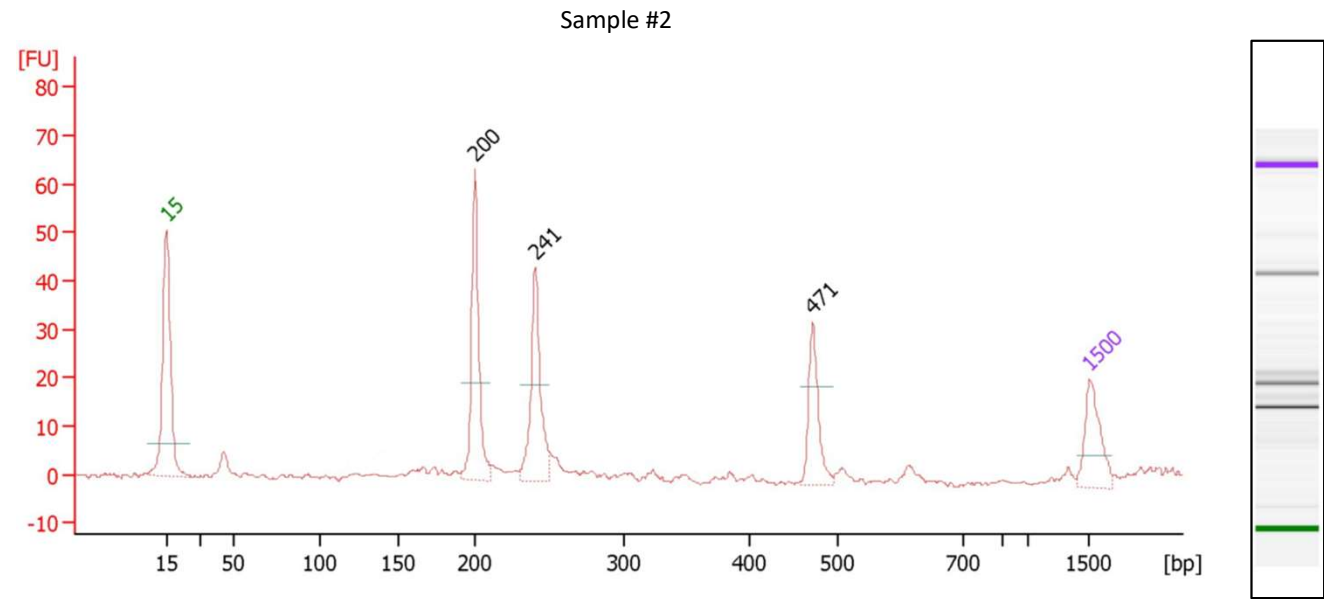

Peak table for Sample #2 :

| Peak | Size [bp] | Conc. [ng/μl] | Molarity [nmol/l] | Observations |
|------|-----------|---------------|-------------------|--------------|
| 1    | 15        | 4.20          | 424.4             | Lower Marker |
| 2    | 50        | 0.53          | 31.4              | Ladder Peak  |
| 3    | 200       | 4.90          | 26.9              | Ladder Peak  |
| 4    | 241       | 3.20          | 7.1               | Ladder Peak  |
| 5    | 471       | 2.05          | 8.1               | Ladder Peak  |
| 6    | 1,500     | 2.10          | 2.2               | Upper Marker |

Assay Class: DNA 1000  
Data Path: C:\...-30\2100\_expert\_DNA 1000\_DE34903611\_2023-03-06\_TRN\_Alul\_1\_10.xad  
Created: 3/07/2023 9:17:20 PM  
Modified: 3/07/2023 9:17:20 PM

Electrophoresis File Run Summary

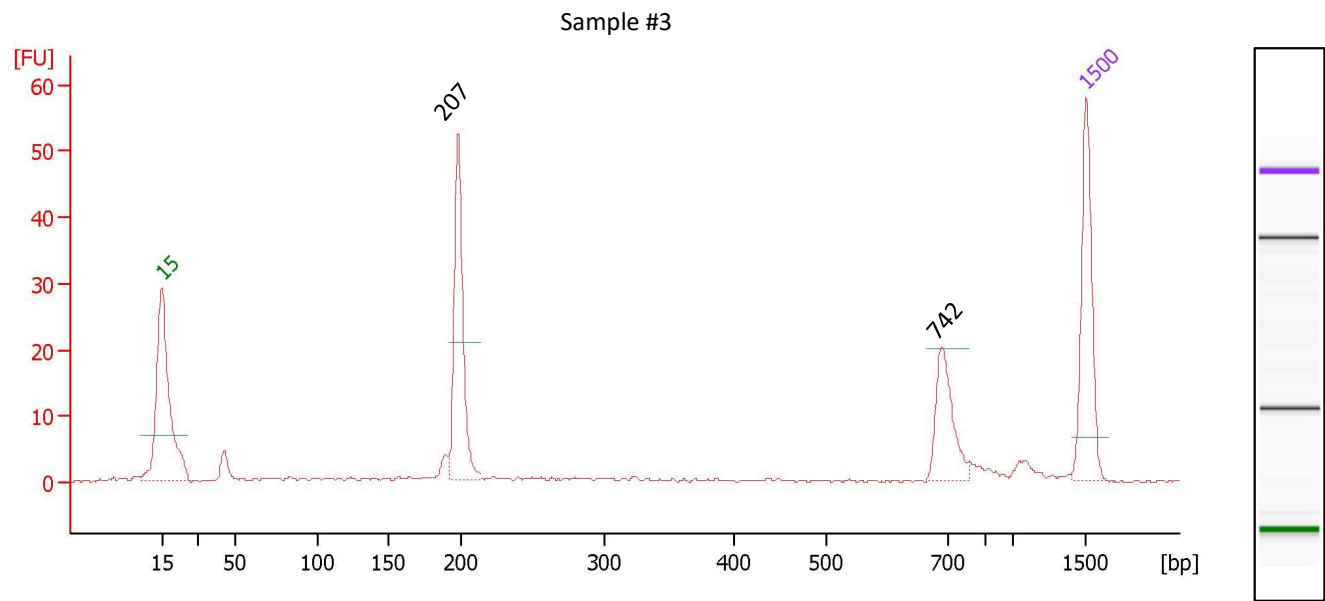

Peak table for Sample #3 :

| Peak | Size [bp] | Conc. [ng/μl] | Molarity [nmol/l] | Observations |
|------|-----------|---------------|-------------------|--------------|
| 1    | 15        | 4.20          | 424.4             | Lower Marker |
| 2    | 207       | 2.10          | 26.9              | Ladder Peak  |
| 3    | 741       | 2.15          | 7.1               | Ladder Peak  |
| 4    | 1,500     | 2.10          | 2.2               | Upper Marker |

Assay Class: DNA 1000  
Data Path: C:\...-30\2100\_expert\_DNA 1000\_DE34903611\_2023-03-06\_TRN\_Alul\_1\_10.xad  
Created: 3/07/2023 9:17:20 PM  
Modified: 3/07/2023 9:17:20 PM

Electrophoresis File Run Summary

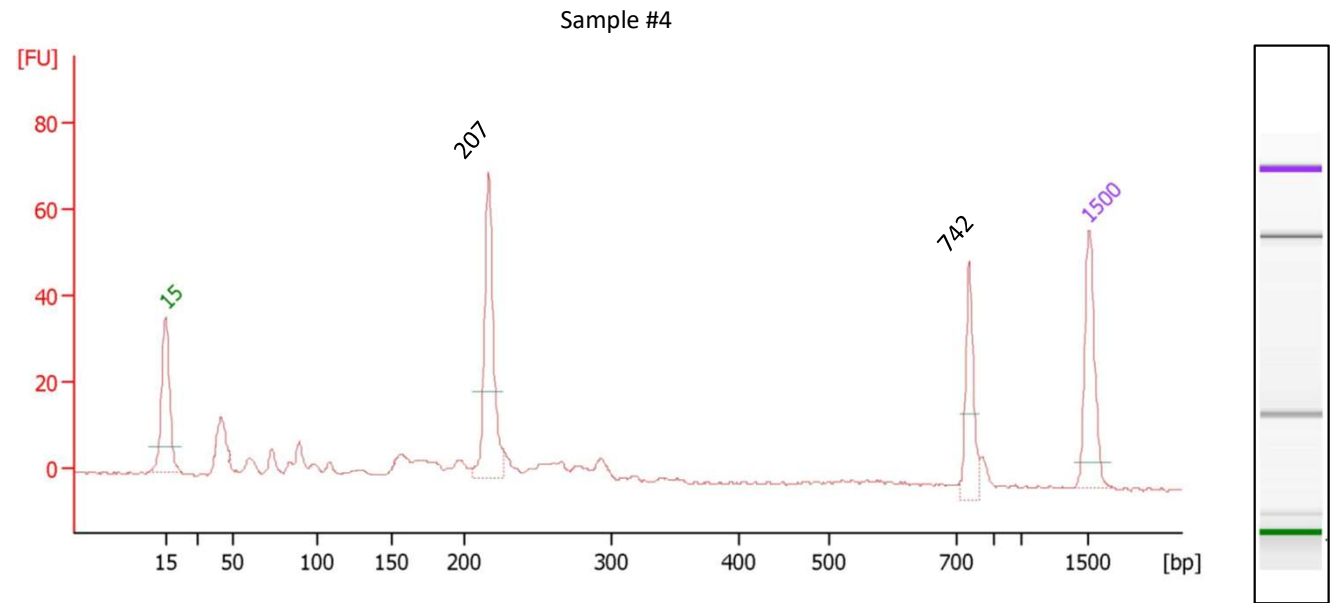

Peak table for Sample #4 :

| Peak | Size [bp] | Conc. [ng/μl] | Molarity [nmol/l] | Observations |
|------|-----------|---------------|-------------------|--------------|
| 1    | 15        | 4.20          | 424.4             | Lower Marker |
| 2    | 50        | 1.00          | 1.23              | Ladder Peak  |
| 3    | 207       | 2.80          | 16.9              | Ladder Peak  |
| 4    | 742       | 2.95          | 17.1              | Ladder Peak  |
| 5    | 1,500     | 2.10          | 2.2               | Upper Marker |

Assay Class: DNA 1000  
Data Path: C:\...-30\2100\_expert\_DNA 1000\_DE34903611\_2023-03-06\_TRN\_Alul\_1\_10.xad  
Created: 3/07/2023 9:17:20 PM  
Modified: 3/07/2023 9:17:20 PM

Electrophoresis File Run Summary

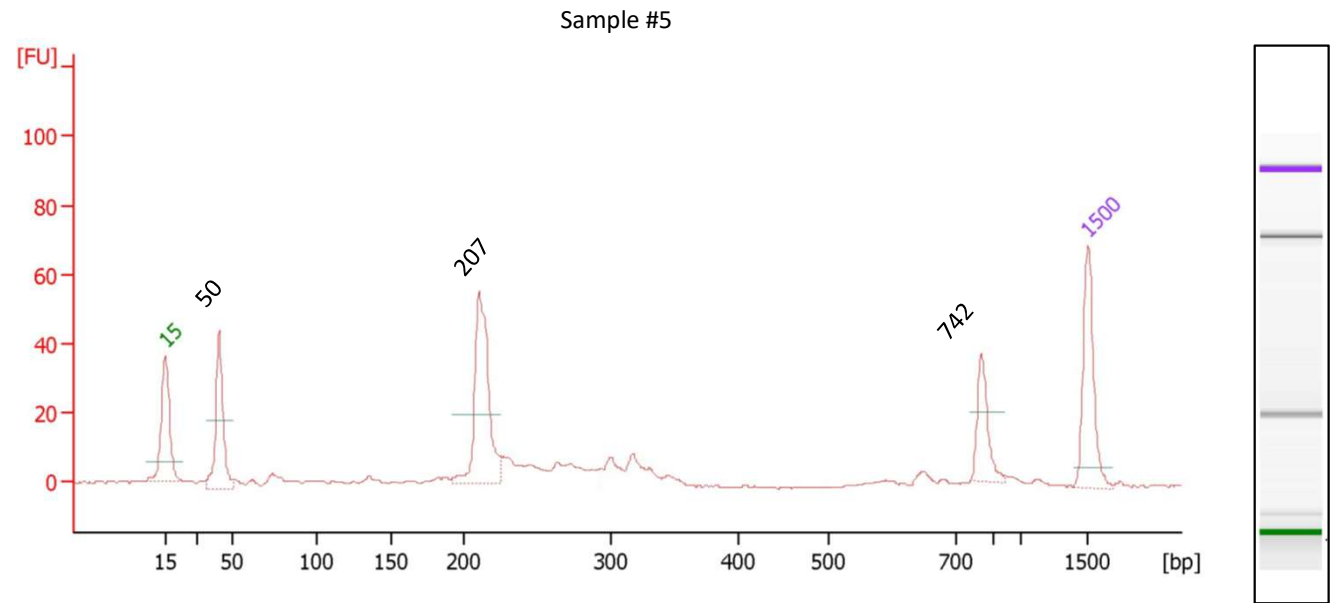

Peak table for Sample #5 :

| Peak | Size [bp] | Conc. [ng/μl] | Molarity [nmol/l] | Observations |
|------|-----------|---------------|-------------------|--------------|
| 1    | 15        | 4.20          | 424.4             | Lower Marker |
| 2    | 50        | 2.00          | 3.3               | Ladder Peak  |
| 3    | 207       | 1.45          | 11.3              | Ladder Peak  |
| 4    | 742       | 2.35          | 7.1               | Ladder Peak  |
| 5    | 1,500     | 2.10          | 2.2               | Upper Marker |

Assay Class: DNA 1000  
Data Path: C:\...-30\2100\_expert\_DNA 1000\_DE34903611\_2023-03-06\_TRN\_Alul\_1\_10.xad  
Created: 3/07/2023 9:17:20 PM  
Modified: 3/07/2023 9:17:20 PM

Electrophoresis File Run Summary

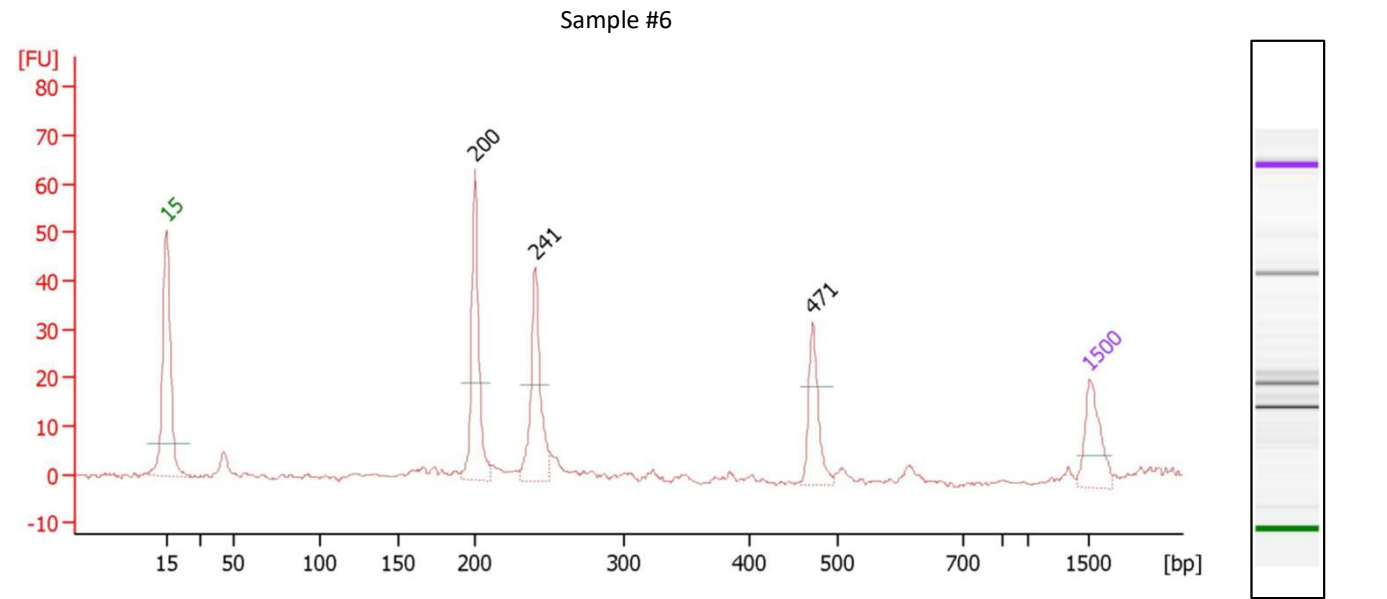

Peak table for Sample #6 :

| Peak | Size [bp] | Conc. [ng/μl] | Molarity [nmol/l] | Observations |
|------|-----------|---------------|-------------------|--------------|
| 1    | 15        | 4.20          | 424.4             | Lower Marker |
| 2    | 50        | 0.53          | 31.4              | Ladder Peak  |
| 3    | 200       | 4.90          | 26.9              | Ladder Peak  |
| 4    | 241       | 3.20          | 7.1               | Ladder Peak  |
| 5    | 471       | 2.05          | 8.1               | Ladder Peak  |
| 6    | 1,500     | 2.10          | 2.2               | Upper Marker |

Assay Class: DNA 1000  
Data Path: C:\...-30\2100\_expert\_DNA 1000\_DE34903611\_2023-03-06\_TRN\_Alul\_1\_10.xad  
Created: 3/07/2023 9:17:20 PM  
Modified: 3/07/2023 9:17:20 PM

Electrophoresis File Run Summary

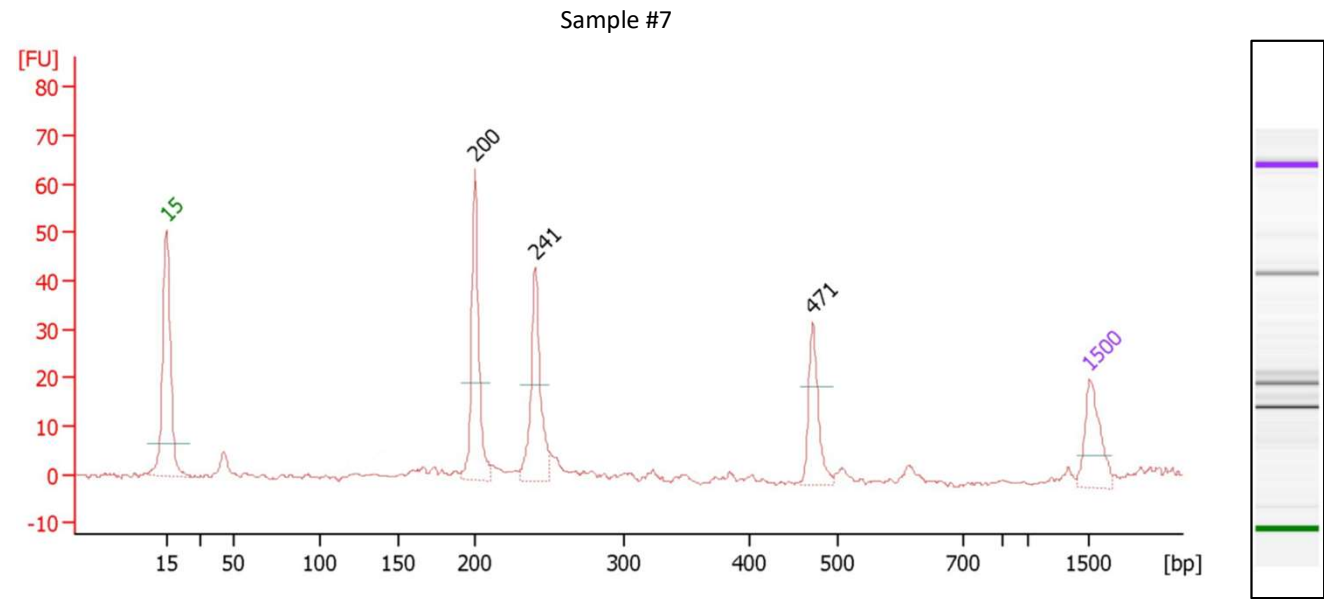

Peak table for Sample #7 :

| Peak | Size [bp] | Conc. [ng/μl] | Molarity [nmol/l] | Observations |
|------|-----------|---------------|-------------------|--------------|
| 1    | 15        | 4.20          | 424.4             | Lower Marker |
| 2    | 50        | 0.53          | 31.4              | Ladder Peak  |
| 3    | 200       | 4.90          | 26.9              | Ladder Peak  |
| 4    | 241       | 3.20          | 7.1               | Ladder Peak  |
| 5    | 471       | 2.05          | 8.1               | Ladder Peak  |
| 6    | 1,500     | 2.10          | 2.2               | Upper Marker |

Assay Class: DNA 1000  
Data Path: C:\...-30\2100\_expert\_DNA 1000\_DE34903611\_2023-03-06\_TRN\_Alul\_1\_10.xad  
Created: 3/07/2023 9:17:20 PM  
Modified: 3/07/2023 9:17:20 PM

Electrophoresis File Run Summary

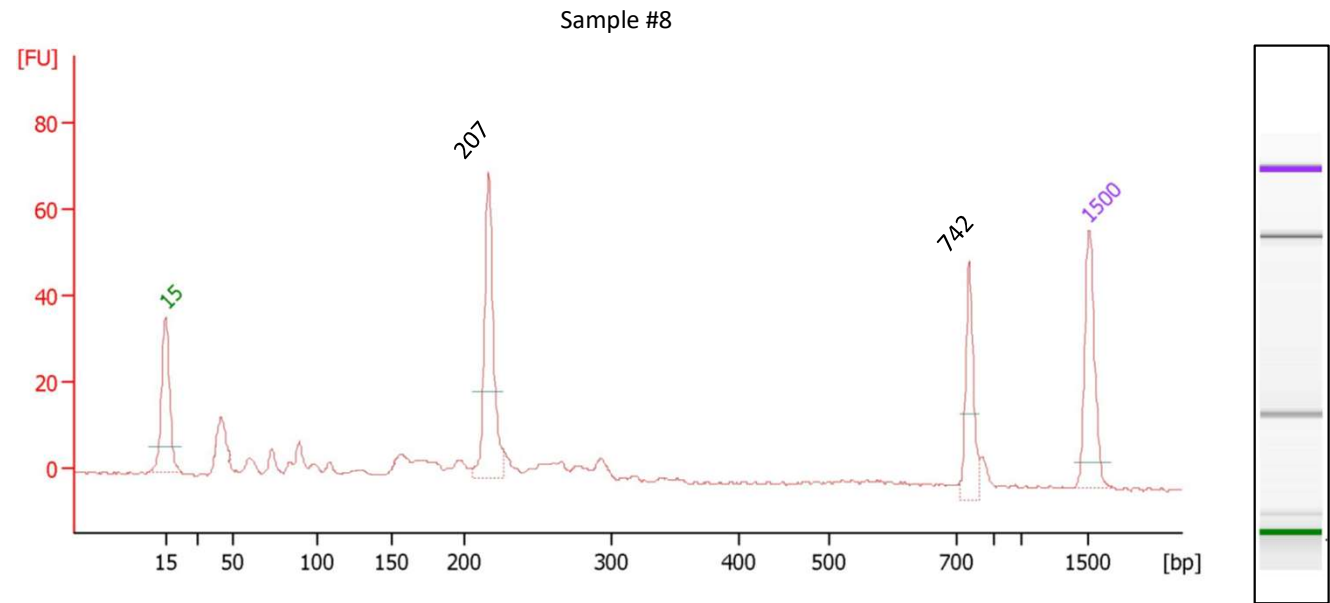

Peak table for Sample #8 :

| Peak | Size [bp] | Conc. [ng/μl] | Molarity [nmol/l] | Observations |
|------|-----------|---------------|-------------------|--------------|
| 1    | 15        | 4.20          | 424.4             | Lower Marker |
| 2    | 50        | 1.00          | 1.23              | Ladder Peak  |
| 3    | 207       | 2.80          | 16.9              | Ladder Peak  |
| 4    | 742       | 2.95          | 17.1              | Ladder Peak  |
| 5    | 1,500     | 2.10          | 2.2               | Upper Marker |

Assay Class: DNA 1000  
Data Path: C:\...-30\2100\_expert\_DNA 1000\_DE34903611\_2023-03-06\_TRN\_Alul\_1\_10.xad  
Created: 3/07/2023 9:17:20 PM  
Modified: 3/07/2023 9:17:20 PM

Electrophoresis File Run Summary

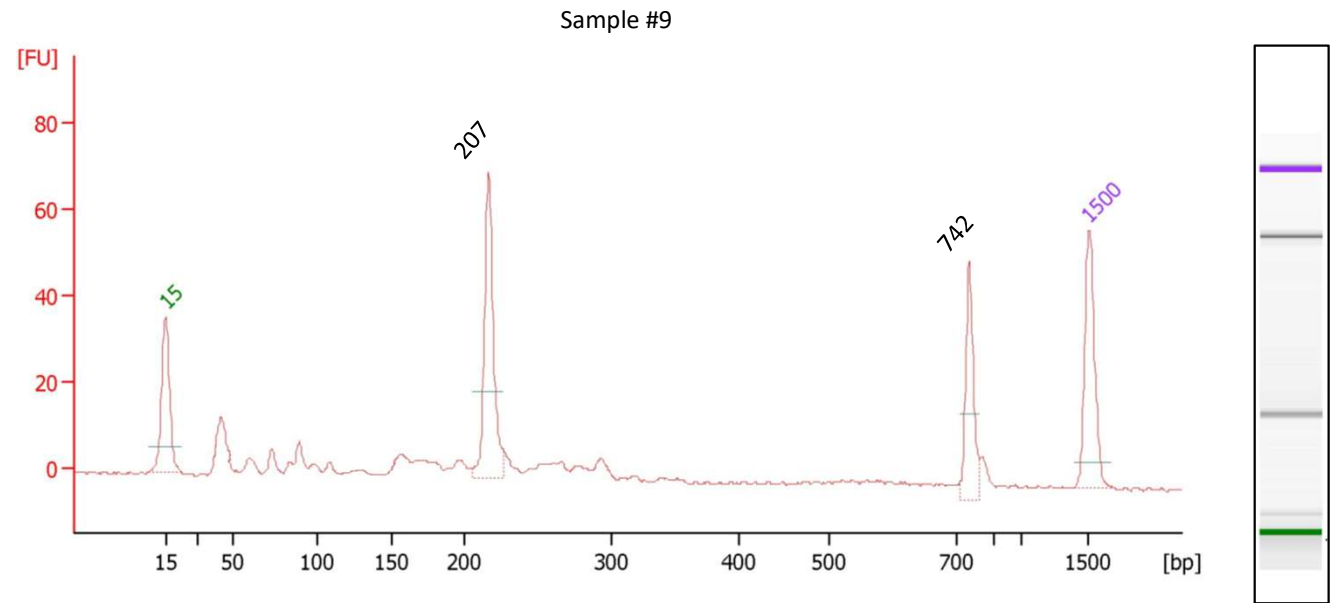

Peak table for Sample #9 :

| Peak | Size [bp] | Conc. [ng/μl] | Molarity [nmol/l] | Observations |
|------|-----------|---------------|-------------------|--------------|
| 1    | 15        | 4.20          | 424.4             | Lower Marker |
| 2    | 50        | 1.00          | 1.23              | Ladder Peak  |
| 3    | 207       | 2.80          | 16.9              | Ladder Peak  |
| 4    | 742       | 2.95          | 17.1              | Ladder Peak  |
| 5    | 1,500     | 2.10          | 2.2               | Upper Marker |

Assay Class: DNA 1000  
Data Path: C:\...-30\2100\_expert\_DNA 1000\_DE34903611\_2023-03-06\_TRN\_Alul\_1\_10.xad  
Created: 3/07/2023 9:17:20 PM  
Modified: 3/07/2023 9:17:20 PM

Electrophoresis File Run Summary

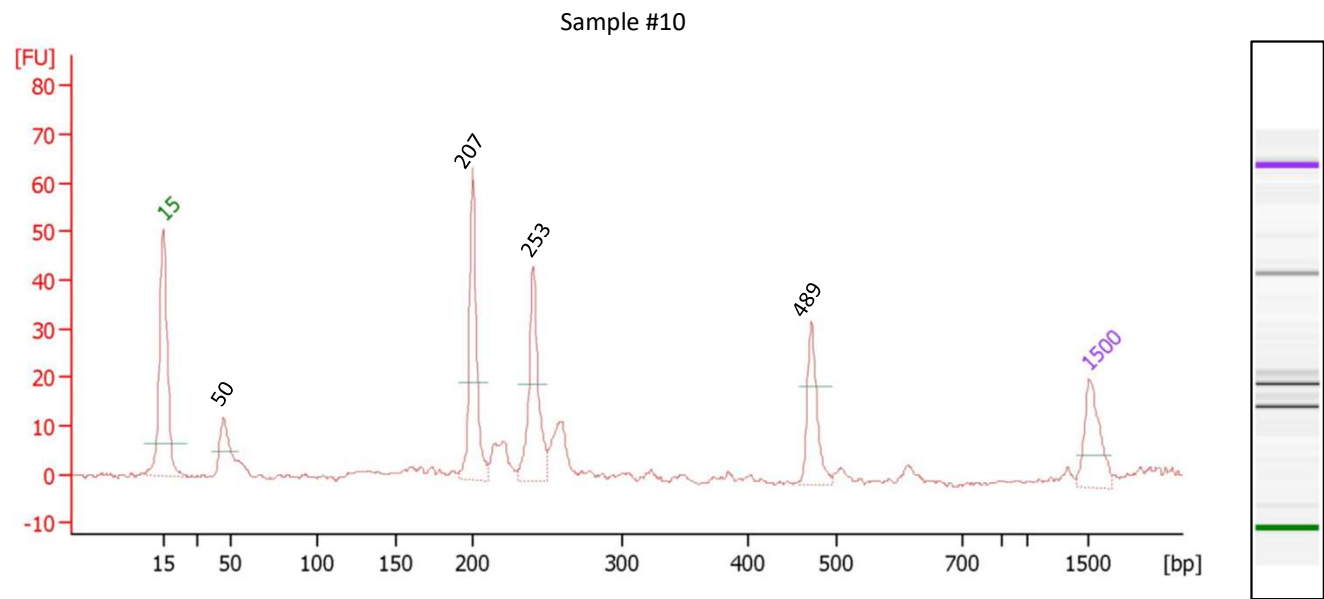

Peak table for Sample #10 :

| Peak | Size [bp] | Conc. [ng/μl] | Molarity [nmol/l] | Observations |
|------|-----------|---------------|-------------------|--------------|
| 1    | 15        | 4.20          | 424.4             | Lower Marker |
| 2    | 50        | 0.63          | 32.5              | Ladder Peak  |
| 3    | 207       | 4.93          | 27.3              | Ladder Peak  |
| 4    | 253       | 3.25          | 7.6               | Ladder Peak  |
| 5    | 489       | 2.07          | 8.4               | Ladder Peak  |
| 6    | 1,500     | 2.10          | 2.2               | Upper Marker |

Assay Class: DNA 1000  
Data Path: C:\...-30\2100\_expert\_DNA 1000\_DE34903611\_2023-03-06\_TRN\_Alul\_1\_10.xad

Created: 3/07/2023 9:17:20 PM  
Modified: 3/07/2023 9:17:20 PM

Electrophoresis File Run Summary



Peak table for Sample CTRL :

| Peak | Size [bp] | Conc. [ng/μl] | Molarity [nmol/l] | Observations |
|------|-----------|---------------|-------------------|--------------|
| 1    | 15        | 4.20          | 424.4             | Lower Marker |
| 2    | 1,500     | 2.10          | 2.2               | Upper Marker |

Assay Class: DNA 1000  
Data Path: C:\...-30\2100\_expert\_DNA 1000\_DE34903611\_2023-03-06\_TRN\_Alul\_1\_10.xad

Created: 3/07/2023 9:17:20 PM  
Modified: 3/07/2023 9:17:20 PM

Electrophoresis File Run Summary



Peak table for Sample CTRL :

| Peak | Size [bp] | Conc. [ng/μl] | Molarity [nmol/l] | Observations |
|------|-----------|---------------|-------------------|--------------|
| 1    | 15        | 4.20          | 424.4             | Lower Marker |
| 2    | 1,500     | 2.10          | 2.1               | Upper Marker |

Assay Class: DNA 1000  
Data Path: C:\...-30\2100\_expert\_DNA 1000\_DE34903611\_2023-03-06\_TRN\_Alul\_1\_10.xad

Created: 3/07/2023 9:17:20 PM  
Modified: 3/07/2023 9:17:20 PM

Curves

Standard Curve



Assay Class: DNA 1000

Created: 3/07/2023 9:17:20 PM

Data Path: C:\...-30\2100\_expert\_DNA\_1000\_DE34903611\_2023-03-06\_TRN\_Alul\_1\_10.xad

Modified: 3/07/2023 9:17:20 PM

Electrophoresis File Run Summary (Chip Summary)

| Sample Name | Sample Content | Rest. Digest             | Status | Observation | Result Label | Result Color |
|-------------|----------------|--------------------------|--------|-------------|--------------|--------------|
| Sample #1   |                | <input type="checkbox"/> | ✓      |             |              |              |
| Sample #2   |                | <input type="checkbox"/> | ✓      |             |              |              |
| Sample #3   |                | <input type="checkbox"/> | ✓      |             |              |              |
| Sample #4   |                | <input type="checkbox"/> | ✓      |             |              |              |
| Sample #5   |                | <input type="checkbox"/> | ✓      |             |              |              |
| Sample #6   |                | <input type="checkbox"/> | ✓      |             |              |              |
| Sample #7   |                | <input type="checkbox"/> | ✓      |             |              |              |
| Sample #8   |                | <input type="checkbox"/> | ✓      |             |              |              |
| Sample #9   |                | <input type="checkbox"/> | ✓      |             |              |              |
| Sample #10  |                | <input type="checkbox"/> | ✓      |             |              |              |
| CTRL        |                | <input type="checkbox"/> | ✓      |             |              |              |
| CTRL        |                | <input type="checkbox"/> | ✓      |             |              |              |

Chip Lot #

Reagent Kit Lot #

Chip Comments :

Assay Class: DNA 1000  
Data Path: C:\...-30\2100\_expert\_DNA 1000\_DE34903611\_2023-03-06\_TRN\_Alul\_1\_10.xad

Created: 3/07/2023 9:17:20 PM  
Modified: 3/07/2023 9:17:20 PM

Electrophoresis Assay Details

| General Analysis Settings                               | Result Label | Result Color |
|---------------------------------------------------------|--------------|--------------|
| Number of Available Sample and Ladder Wells (Max.) : 13 |              |              |
| Minimum Visible Range [s] : 30                          |              |              |
| Maximum Visible Range [s] : 129                         |              |              |
| Start Analysis Time Range [s] : 30                      |              |              |
| End Analysis Time Range [s] : 128.95                    |              |              |
| Ladder Concentration [ng/μl] : 44                       |              |              |
| Uses Standard Area for Ladder Fragments                 |              |              |
| Lower Marker Concentration [ng/μl] : 4.2                |              |              |
| Upper Marker Concentration [ng/μl] : 2.1                |              |              |
| Used Upper Marker for Quantitation                      |              |              |
| Standard Curve Fit is Point to Point                    |              |              |
| Show Data Aligned to Lower and Upper Marker             |              |              |

Integrator Settings

Integration Start Time [s] : 30  
Integration End Time [s] : 128.95  
Slope Threshold : 0.5  
Height Threshold [FU] : 20  
Area Threshold : 0.1  
Width Threshold [s] : 0.5  
Baseline Plateau [s] : 0.5

Filter Settings

Filter Width [s] : 0.5  
Polynomial Order : 4

Ladder

| Ladder Peak | Size | Area |
|-------------|------|------|
| 1           | 15   | 25   |
| 2           | 25   | 26   |
| 3           | 50   | 34   |
| 4           | 100  | 41   |
| 5           | 150  | 45   |
| 6           | 200  | 52   |
| 7           | 300  | 63   |
| 8           | 400  | 76   |
| 9           | 500  | 83   |
| 10          | 700  | 88   |
| 11          | 850  | 86   |
| 12          | 1000 | 90   |
| 13          | 1500 | 52   |

Assay Class: DNA 1000  
Data Path: C:\...-30\2100 expert\_DNA 1000\_DE34903611\_2023-03-06\_TRN\_Alul\_11\_20.xad

Created: 3/08/2023 10:21:55 PM  
Modified: 3/08/2023 10:21:55 PM

Electrophoresis File Run Summary

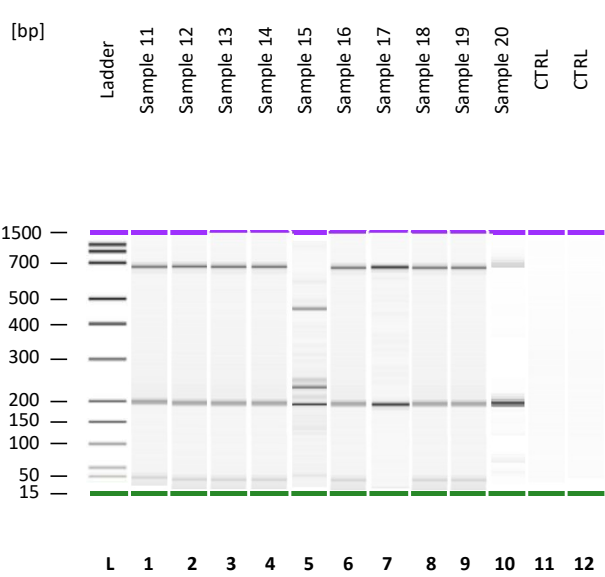

Instrument Information:

Instrument Name: DE34903611  
Serial #: DE34903611  
Firmware: C.01.069  
Type: G2938C

Assay Information:

Assay Origin Path: C:\Program Files\Agilent\2100 bioanalyzer\2100 expert\assays\dsDNA\DNA 1000 Series II.xsy  
Assay Class: DNA 1000  
Version: 2.3  
Assay Comments: DNA Analysis 2 - 1000 bp

© Copyright 2003-2009 Agilent Technologies, Inc.

Chip Information:

Chip Lot #:  
Reagent Kit Lot #:  
Chip Comments:

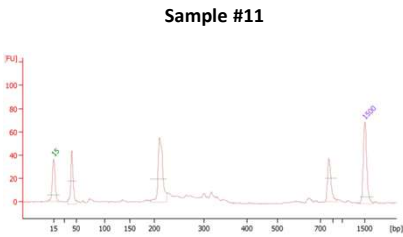

Sample #11

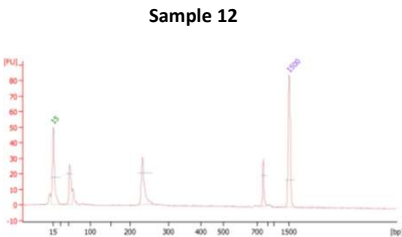

Sample #12

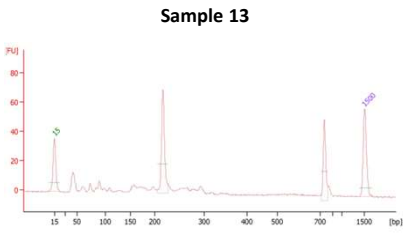

Sample #13

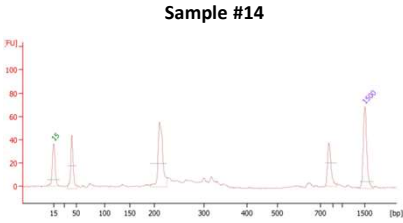

Sample #14

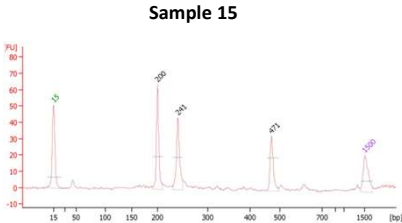

Sample #15

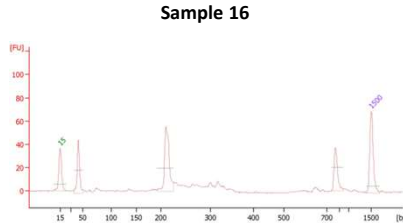

Sample #16

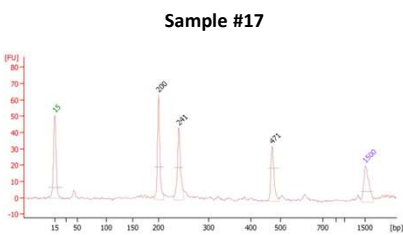

Sample #17

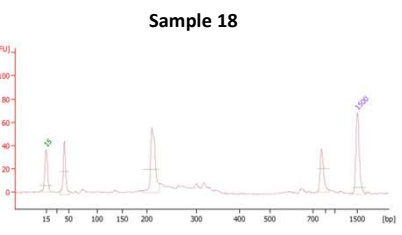

Sample #18

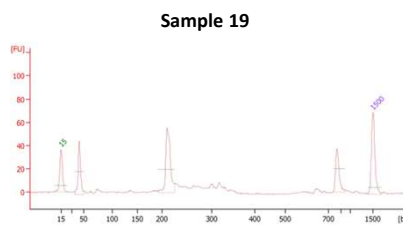

Sample #19

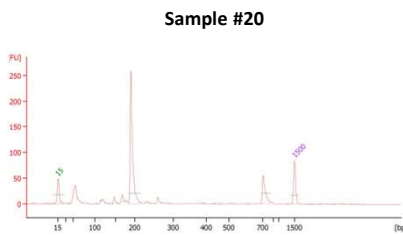

Sample #20

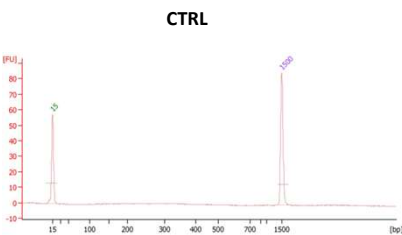

CTRL

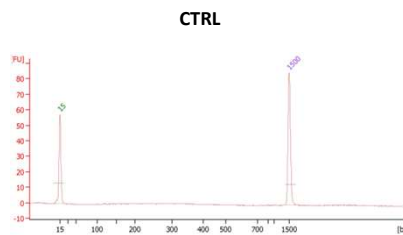

CTRL

Assay Class: DNA 1000  
Data Path: C:\...-30\2100\_expert\_DNA\_1000\_DE34903611\_2023-03-06\_TRN\_Alul\_11\_20.xad  
Created: 3/08/2023 10:21:55 PM  
Modified: 3/08/2023 10:21:55 PM

Electrophoresis File Run Summary



Peak table for Ladder :

| Peak | Size [bp] | Conc. [ng/μl] | Molarity [nmol/l] | Observations |
|------|-----------|---------------|-------------------|--------------|
| 1    | 15        | 4.20          | 4.4.2             | Lower Marker |
| 2    | 25        | 4.00          | 242.4             | Ladder Peak  |
| 3    | 50        | 4.00          | 121.2             | Ladder Peak  |
| 4    | 100       | 4.00          | 60.6              | Ladder Peak  |
| 5    | 150       | 4.00          | 40.3              | Ladder Peak  |
| 6    | 200       | 4.00          | 30.3              | Ladder Peak  |
| 7    | 300       | 4.00          | 20.2              | Ladder Peak  |
| 8    | 400       | 4.00          | 15.2              | Ladder Peak  |
| 9    | 500       | 4.00          | 12.1              | Ladder Peak  |
| 10   | 700       | 4.00          | 8.7               | Ladder Peak  |
| 11   | 850       | 4.00          | 7.1               | Ladder Peak  |
| 12   | 1,000     | 4.00          | 6.1               | Ladder Peak  |
| 13   | 1,500     | 2.10          | 2.1               | Upper Marker |

Assay Class: DNA 1000  
Data Path: C:\...-30\2100\_expert\_DNA 1000\_DE34903611\_2023-03-06\_TRN\_Alul\_11\_20.xad  
Created: 3/08/2023 10:21:55 PM  
Modified: 3/08/2023 10:21:55 PM

Electrophoresis File Run Summary

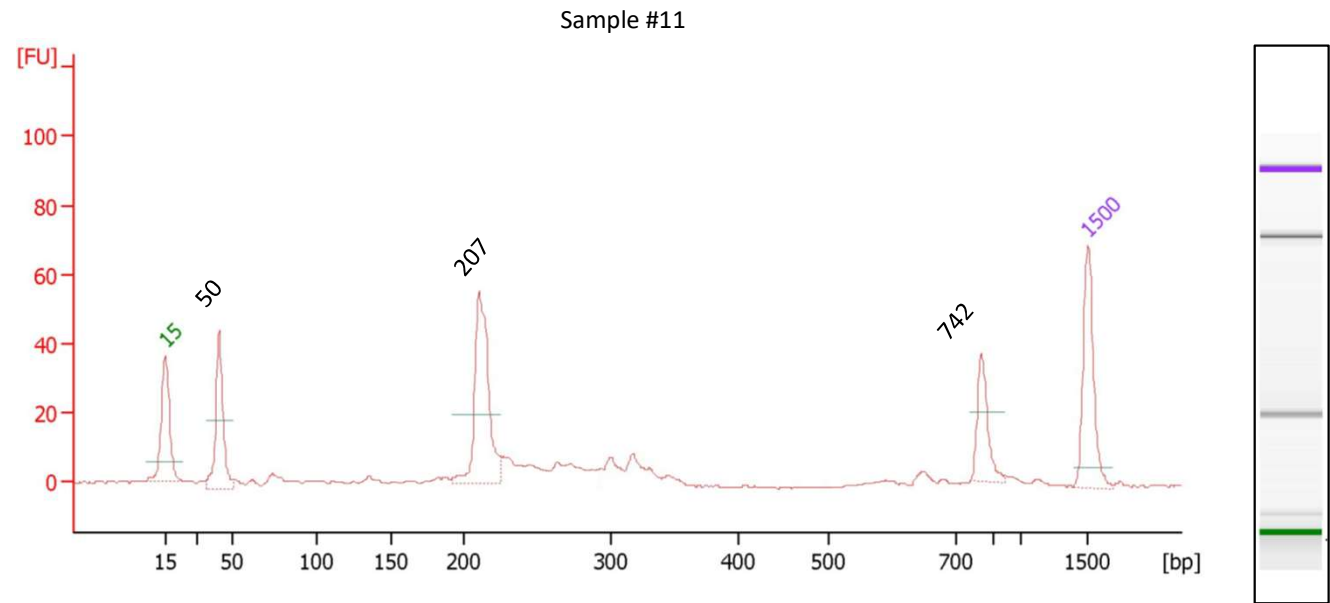

Peak table for Sample #11 :

| Peak | Size [bp] | Conc. [ng/μl] | Molarity [nmol/l] | Observations |
|------|-----------|---------------|-------------------|--------------|
| 1    | 15        | 4.20          | 424.4             | Lower Marker |
| 2    | 50        | 2.00          | 2.3               | Ladder Peak  |
| 3    | 207       | 4.45          | 9.3               | Ladder Peak  |
| 4    | 742       | 2.35          | 6.3               | Ladder Peak  |
| 5    | 1,500     | 2.10          | 2.2               | Upper Marker |

Assay Class: DNA 1000  
Data Path: C:\...-30\2100\_expert\_DNA 1000\_DE34903611\_2023-03-06\_TRN\_Alul\_11\_20.xad  
Created: 3/08/2023 10:21:55 PM  
Modified: 3/08/2023 10:21:55 PM

Electrophoresis File Run Summary

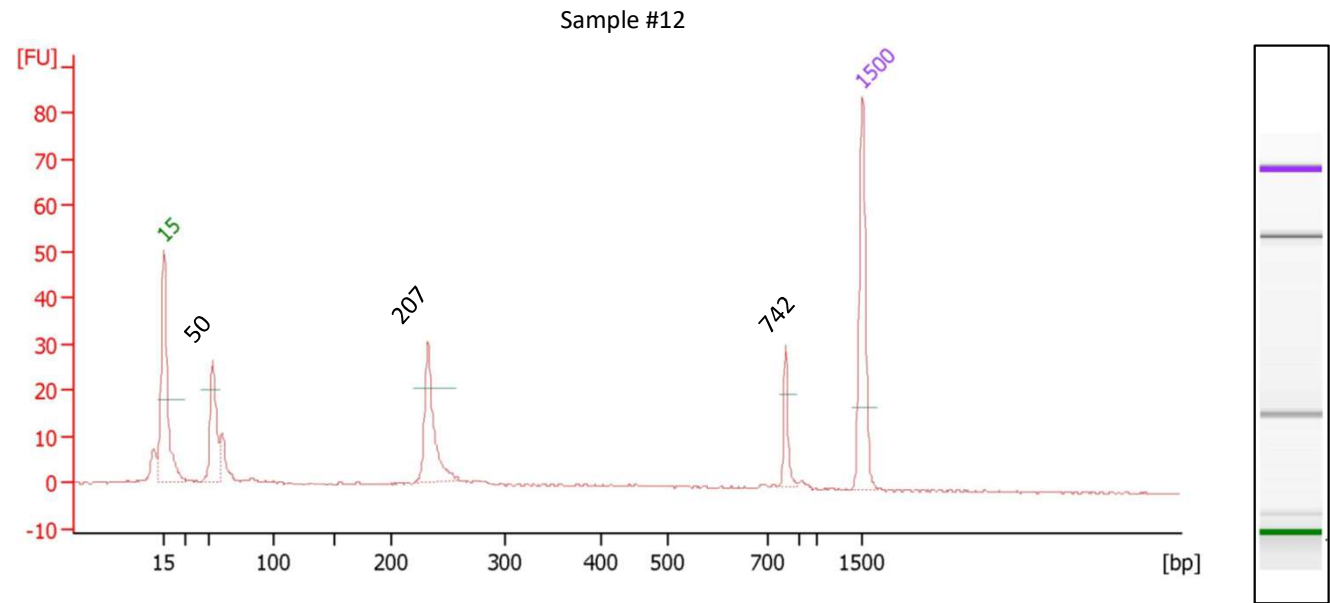

Peak table for Sample #12 :

| Peak | Size [bp] | Conc. [ng/μl] | Molarity [nmol/l] | Observations |
|------|-----------|---------------|-------------------|--------------|
| 1    | 15        | 4.20          | 424.4             | Lower Marker |
| 2    | 50        | 2.00          | 1.1               | Ladder Peak  |
| 3    | 207       | 1.45          | 4.2               | Ladder Peak  |
| 4    | 742       | 2.35          | 3.1               | Ladder Peak  |
| 5    | 1,500     | 2.10          | 2.2               | Upper Marker |

Assay Class: DNA 1000  
Data Path: C:\...-30\2100\_expert\_DNA 1000\_DE34903611\_2023-03-06\_TRN\_Alul\_11\_20.xad  
Created: 3/08/2023 10:21:55 PM  
Modified: 3/08/2023 10:21:55 PM

Electrophoresis File Run Summary

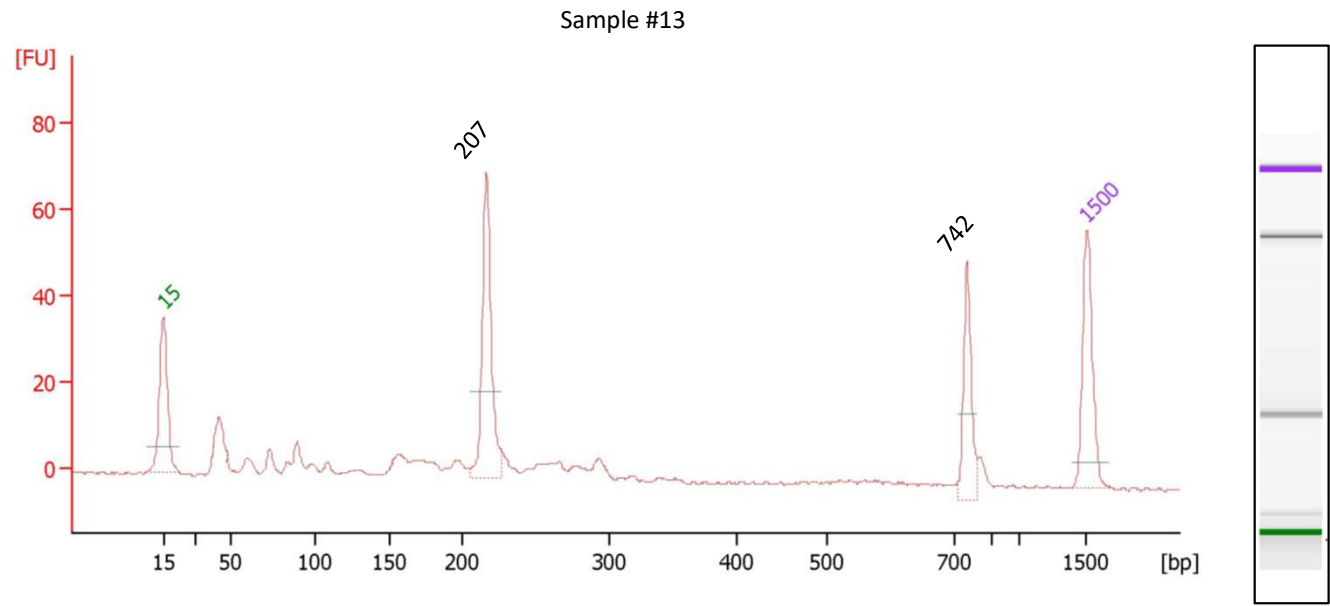

Peak table for Sample #13 :

| Peak | Size [bp] | Conc. [ng/μl] | Molarity [nmol/l] | Observations |
|------|-----------|---------------|-------------------|--------------|
| 1    | 15        | 4.20          | 424.4             | Lower Marker |
| 2    | 50        | 1.00          | 1.13              | Ladder Peak  |
| 3    | 207       | 2.95          | 18.0              | Ladder Peak  |
| 4    | 742       | 3.01          | 16.1              | Ladder Peak  |
| 5    | 1,500     | 2.10          | 2.2               | Upper Marker |

Assay Class: DNA 1000  
Data Path: C:\...-30\2100\_expert\_DNA 1000\_DE34903611\_2023-03-06\_TRN\_Alul\_11\_20.xad  
Created: 3/08/2023 10:21:55 PM  
Modified: 3/08/2023 10:21:55 PM

Electrophoresis File Run Summary

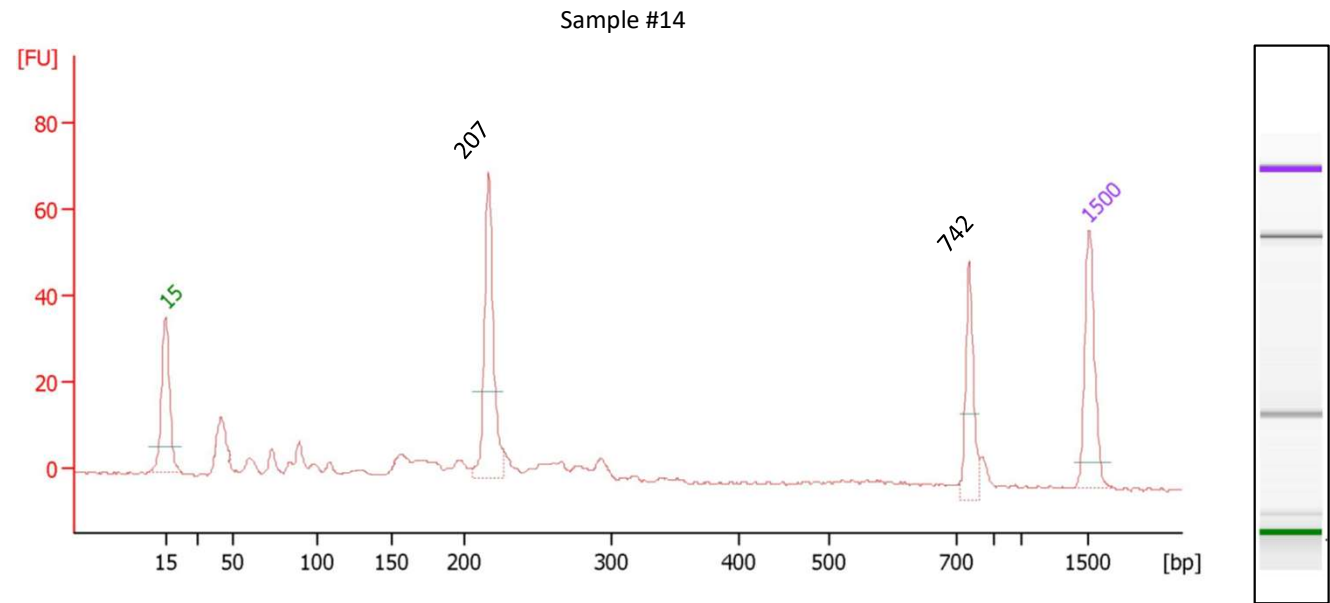

Peak table for Sample #14 :

| Peak | Size [bp] | Conc. [ng/μl] | Molarity [nmol/l] | Observations |
|------|-----------|---------------|-------------------|--------------|
| 1    | 15        | 4.20          | 424.4             | Lower Marker |
| 2    | 50        | 1.00          | 1.23              | Ladder Peak  |
| 3    | 207       | 2.80          | 16.9              | Ladder Peak  |
| 4    | 742       | 2.95          | 17.1              | Ladder Peak  |
| 5    | 1,500     | 2.10          | 2.2               | Upper Marker |

Assay Class: DNA 1000  
Data Path: C:\...-30\2100\_expert\_DNA 1000\_DE34903611\_2023-03-06\_TRN\_Alul\_11\_20.xad  
Created: 3/08/2023 10:21:55 PM  
Modified: 3/08/2023 10:21:55 PM

Electrophoresis File Run Summary

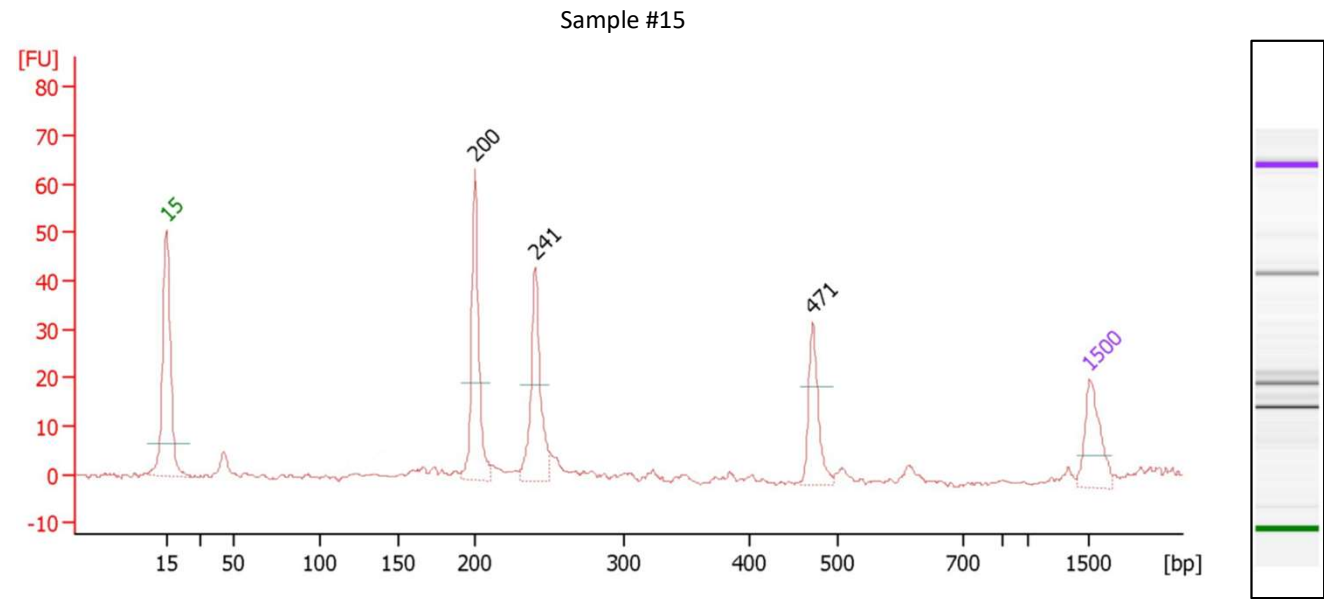

Peak table for Sample #15 :

| Peak | Size [bp] | Conc. [ng/μl] | Molarity [nmol/l] | Observations |
|------|-----------|---------------|-------------------|--------------|
| 1    | 15        | 4.20          | 424.4             | Lower Marker |
| 2    | 50        | 0.53          | 31.4              | Ladder Peak  |
| 3    | 200       | 4.90          | 26.9              | Ladder Peak  |
| 4    | 241       | 3.20          | 7.1               | Ladder Peak  |
| 5    | 471       | 2.05          | 8.1               | Ladder Peak  |
| 6    | 1,500     | 2.10          | 2.2               | Upper Marker |

Assay Class: DNA 1000  
Data Path: C:\...-30\2100\_expert\_DNA 1000\_DE34903611\_2023-03-06\_TRN\_Alul\_11\_20.xad  
Created: 3/08/2023 10:21:55 PM  
Modified: 3/08/2023 10:21:55 PM

Electrophoresis File Run Summary

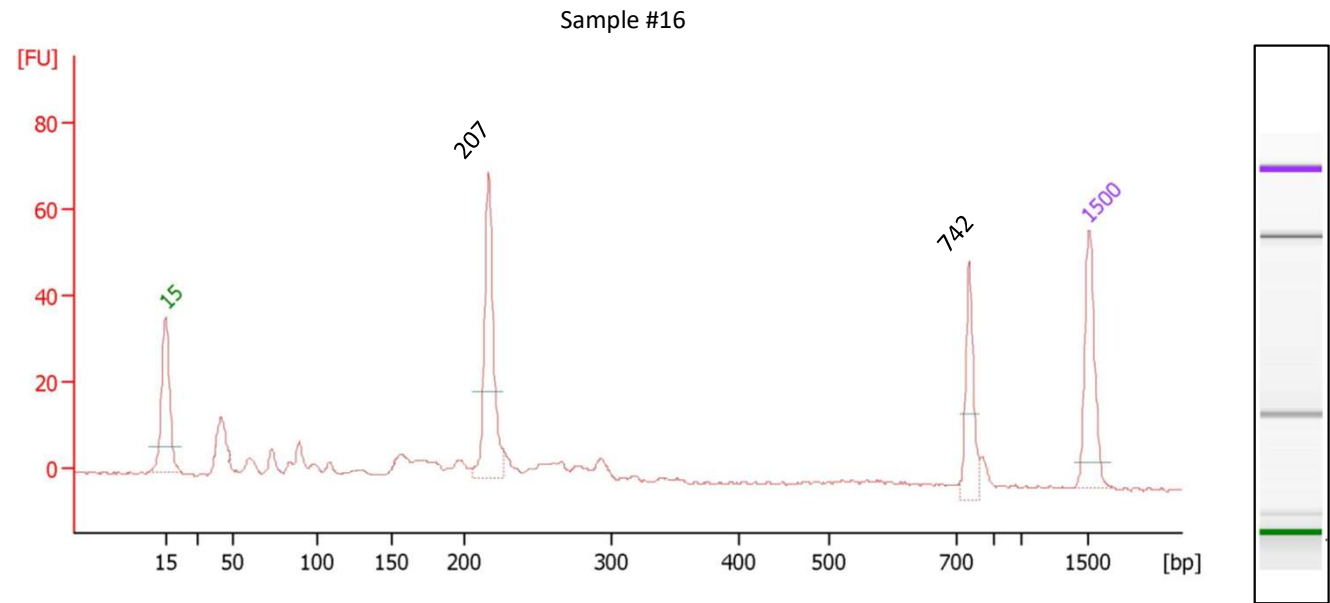

Peak table for Sample #16 :

| Peak | Size [bp] | Conc. [ng/μl] | Molarity [nmol/l] | Observations |
|------|-----------|---------------|-------------------|--------------|
| 1    | 15        | 4.20          | 424.4             | Lower Marker |
| 2    | 207       | 2.80          | 16.9              | Ladder Peak  |
| 3    | 742       | 2.95          | 17.1              | Ladder Peak  |
| 4    | 1,500     | 2.10          | 2.2               | Upper Marker |

Assay Class: DNA 1000  
Data Path: C:\...-30\2100\_expert\_DNA 1000\_DE34903611\_2023-03-06\_TRN\_Alul\_11\_20.xad  
Created: 3/08/2023 10:21:55 PM  
Modified: 3/08/2023 10:21:55 PM

Electrophoresis File Run Summary

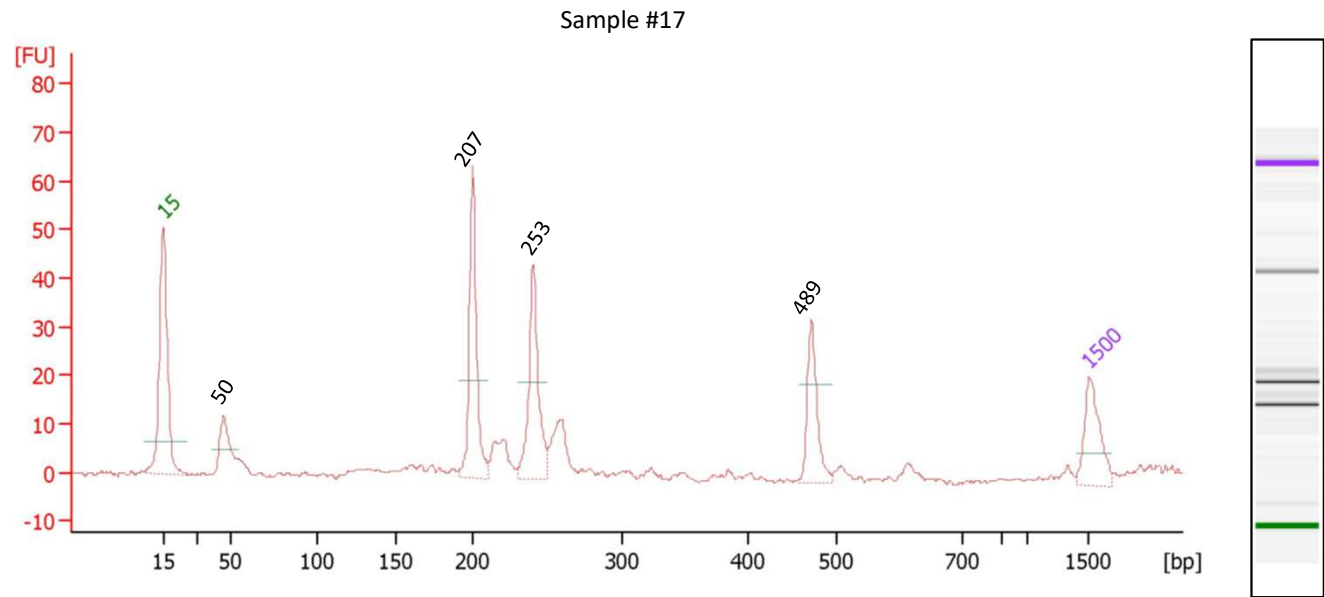

Peak table for Sample #17 :

| Peak | Size [bp] | Conc. [ng/μl] | Molarity [nmol/l] | Observations |
|------|-----------|---------------|-------------------|--------------|
| 1    | 15        | 4.20          | 424.4             | Lower Marker |
| 2    | 50        | 0.63          | 32.5              | Ladder Peak  |
| 3    | 207       | 4.93          | 27.3              | Ladder Peak  |
| 4    | 253       | 3.25          | 7.6               | Ladder Peak  |
| 5    | 489       | 2.07          | 8.4               | Ladder Peak  |
| 6    | 1,500     | 2.10          | 2.2               | Upper Marker |

Assay Class: DNA 1000  
Data Path: C:\...-30\2100\_expert\_DNA 1000\_DE34903611\_2023-03-06\_TRN\_Alul\_11\_20.xad  
Created: 3/08/2023 10:21:55 PM  
Modified: 3/08/2023 10:21:55 PM

Electrophoresis File Run Summary

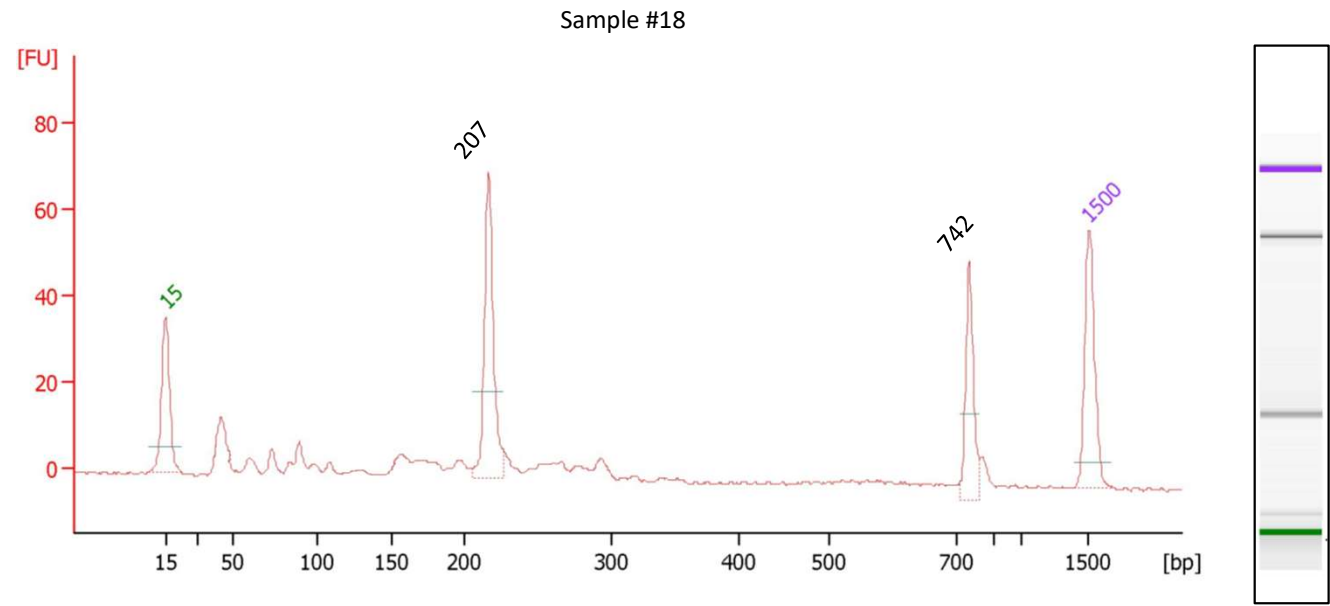

Peak table for Sample #18 :

| Peak | Size [bp] | Conc. [ng/μl] | Molarity [nmol/l] | Observations |
|------|-----------|---------------|-------------------|--------------|
| 1    | 15        | 4.20          | 424.4             | Lower Marker |
| 2    | 207       | 2.80          | 16.9              | Ladder Peak  |
| 3    | 742       | 2.95          | 17.1              | Ladder Peak  |
| 4    | 1,500     | 2.10          | 2.2               | Upper Marker |

Assay Class: DNA 1000  
Data Path: C:\...-30\2100\_expert\_DNA 1000\_DE34903611\_2023-03-06\_TRN\_Alul\_11\_20.xad  
Created: 3/08/2023 10:21:55 PM  
Modified: 3/08/2023 10:21:55 PM

Electrophoresis File Run Summary

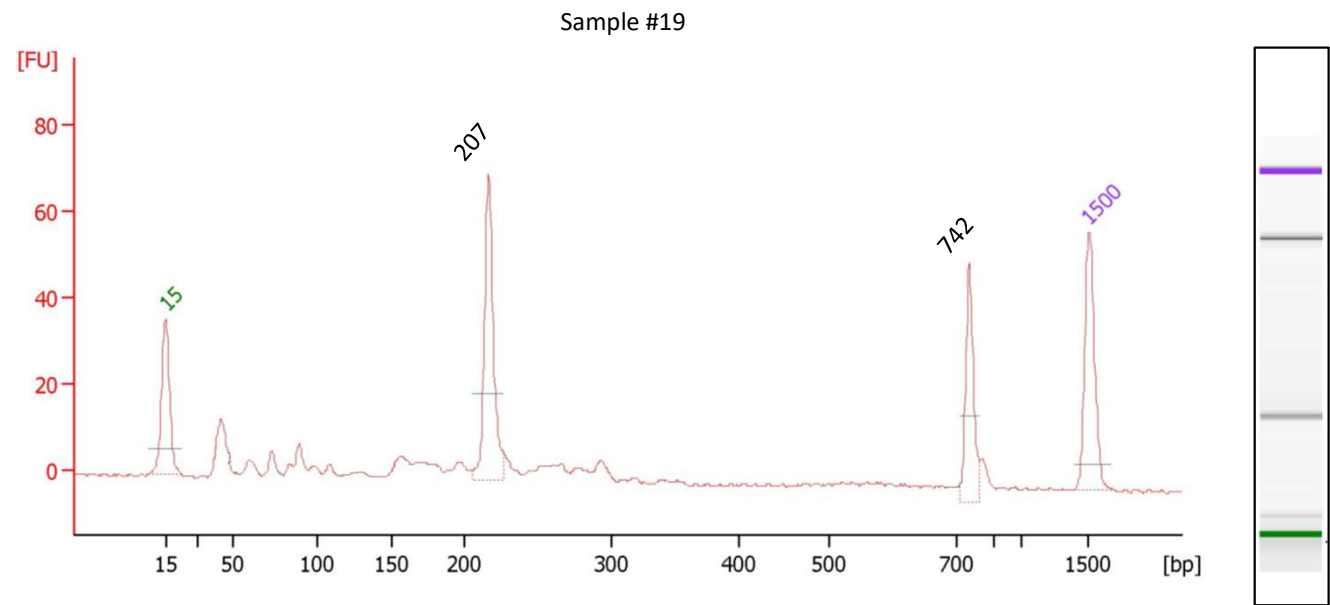

Peak table for Sample #19 :

| Peak | Size [bp] | Conc. [ng/μl] | Molarity [nmol/l] | Observations |
|------|-----------|---------------|-------------------|--------------|
| 1    | 15        | 4.20          | 424.4             | Lower Marker |
| 2    | 50        | 1.00          | 1.23              | Ladder Peak  |
| 3    | 207       | 2.80          | 16.9              | Ladder Peak  |
| 4    | 742       | 2.95          | 17.1              | Ladder Peak  |
| 5    | 1,500     | 2.10          | 2.2               | Upper Marker |

Assay Class: DNA 1000  
Data Path: C:\...-30\2100\_expert\_DNA\_1000\_DE34903611\_2023-03-06\_TRN\_Alul\_11\_20.xad  
Created: 3/08/2023 10:21:55 PM  
Modified: 3/08/2023 10:21:55 PM

Electrophoresis File Run Summary

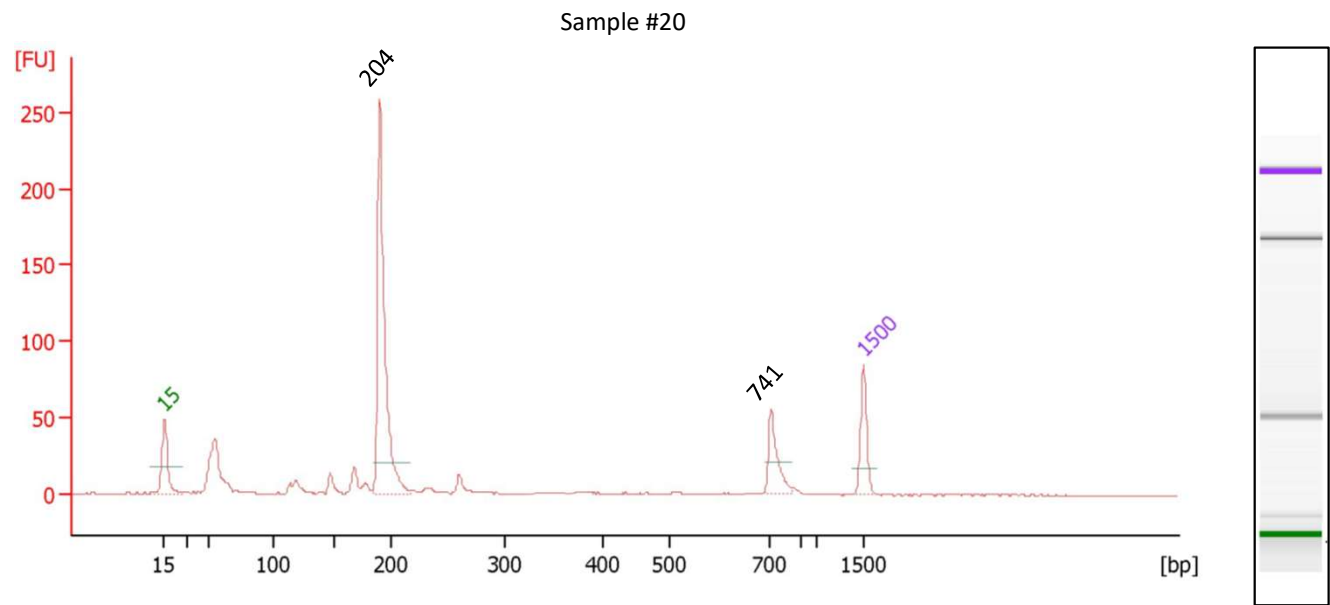

Peak table for Sample #20 :

| Peak | Size [bp] | Conc. [ng/μl] | Molarity [nmol/l] | Observations |
|------|-----------|---------------|-------------------|--------------|
| 1    | 15        | 4.20          | 424.4             | Lower Marker |
| 2    | 204       | 1.45          | 18.9              | Ladder Peak  |
| 3    | 741       | 2.35          | 6.3               | Ladder Peak  |
| 4    | 1,500     | 2.10          | 2.2               | Upper Marker |

Assay Class: DNA 1000  
Data Path: C:\...-30\2100 expert\_DNA 1000\_DE34903611\_2023-03-06\_TRN\_Alul\_11\_20.xad  
Created: 3/08/2023 10:21:55 PM  
Modified: 3/08/2023 10:21:55 PM

Electrophoresis File Run Summary

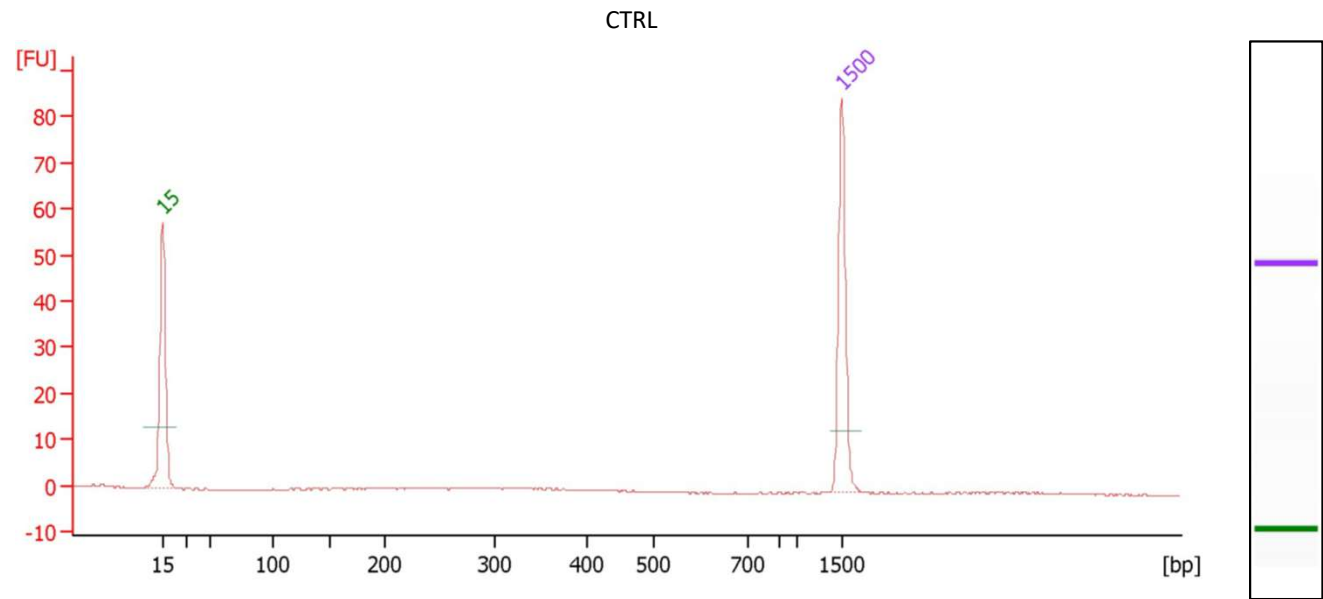

Peak table for Sample CTRL :

| Peak | Size [bp] | Conc. [ng/μl] | Molarity [nmol/l] | Observations |
|------|-----------|---------------|-------------------|--------------|
| 1    | 15        | 4.20          | 424.4             | Lower Marker |
| 2    | 1,500     | 2.10          | 2.2               | Upper Marker |

Assay Class: DNA 1000  
Data Path: C:\...-30\2100\_expert\_DNA 1000\_DE34903611\_2023-03-06\_TRN\_Alul\_11\_20.xad

Created: 3/08/2023 10:21:55 PM  
Modified: 3/08/2023 10:21:55 PM

Electrophoresis File Run Summary



Peak table for Sample CTRL :

| Peak | Size [bp] | Conc. [ng/μl] | Molarity [nmol/l] | Observations |
|------|-----------|---------------|-------------------|--------------|
| 1    | 15        | 4.20          | 424.4             | Lower Marker |
| 2    | 1,500     | 2.10          | 2.1               | Upper Marker |

Assay Class: DNA 1000  
Data Path: C:\...-30\2100\_expert\_DNA 1000\_DE34903611\_2023-03-06\_TRN\_Alul\_11\_20.xad

Created: 3/08/2023 10:21:55 PM

Modified: 3/08/2023 10:21:55 PM

Curves

Standard Curve



Assay Class: DNA 1000  
Data Path: C:\...-30\2100\_expert\_DNA 1000\_DE34903611\_2023-03-06\_TRN\_Alul\_11\_20.xad

Created: 3/08/2023 10:21:55 PM  
Modified: 3/08/2023 10:21:55 PM

Electrophoresis File Run Summary (Chip Summary)

| Sample Name | Sample Content | Rest. Digest             | Status | Observation | Result Label | Result Color |
|-------------|----------------|--------------------------|--------|-------------|--------------|--------------|
| Sample #11  |                | <input type="checkbox"/> | ✓      |             |              |              |
| Sample #12  |                | <input type="checkbox"/> | ✓      |             |              |              |
| Sample #13  |                | <input type="checkbox"/> | ✓      |             |              |              |
| Sample #14  |                | <input type="checkbox"/> | ✓      |             |              |              |
| Sample #15  |                | <input type="checkbox"/> | ✓      |             |              |              |
| Sample #16  |                | <input type="checkbox"/> | ✓      |             |              |              |
| Sample #17  |                | <input type="checkbox"/> | ✓      |             |              |              |
| Sample #18  |                | <input type="checkbox"/> | ✓      |             |              |              |
| Sample #19  |                | <input type="checkbox"/> | ✓      |             |              |              |
| Sample #20  |                | <input type="checkbox"/> | ✓      |             |              |              |
| CTRL        |                | <input type="checkbox"/> | ✓      |             |              |              |
| CTRL        |                | <input type="checkbox"/> | ✓      |             |              |              |

Chip Lot #

Reagent Kit Lot #

Chip Comments :

Assay Class: DNA 1000 Created: 3/08/2023 10:21:55 PM  
Data Path: C:\...-30\2100\_expert\_DNA\_1000\_DE34903611\_2023-03-06\_TRN\_Alul\_11\_20.xad Modified: 3/08/2023 10:21:55 PM

Electrophoresis Assay Details

| General Analysis Settings                               | Result Label | Result Color |
|---------------------------------------------------------|--------------|--------------|
| Number of Available Sample and Ladder Wells (Max.) : 13 |              |              |
| Minimum Visible Range [s] : 30                          |              |              |
| Maximum Visible Range [s] : 129                         |              |              |
| Start Analysis Time Range [s] : 30                      |              |              |
| End Analysis Time Range [s] : 128.95                    |              |              |
| Ladder Concentration [ng/μl] : 44                       |              |              |
| Uses Standard Area for Ladder Fragments                 |              |              |
| Lower Marker Concentration [ng/μl] : 4.2                |              |              |
| Upper Marker Concentration [ng/μl] : 2.1                |              |              |
| Used Upper Marker for Quantitation                      |              |              |
| Standard Curve Fit is Point to Point                    |              |              |
| Show Data Aligned to Lower and Upper Marker             |              |              |

Integrator Settings

Integration Start Time [s] : 30  
Integration End Time [s] : 128.95  
Slope Threshold : 0.5  
Height Threshold [FU] : 20  
Area Threshold : 0.1  
Width Threshold [s] : 0.5  
Baseline Plateau [s] : 0.5

Filter Settings

Filter Width [s] : 0.5  
Polynomial Order : 4

Ladder

| Ladder Peak | Size | Area |
|-------------|------|------|
| 1           | 15   | 25   |
| 2           | 25   | 26   |
| 3           | 50   | 34   |
| 4           | 100  | 41   |
| 5           | 150  | 45   |
| 6           | 200  | 52   |
| 7           | 300  | 63   |
| 8           | 400  | 76   |
| 9           | 500  | 83   |
| 10          | 700  | 88   |
| 11          | 850  | 86   |
| 12          | 1000 | 90   |
| 13          | 1500 | 52   |
