# Supplementary material for: Discrimination of Green Coffee (Coffea arabica and Coffea canephora) of Different Geographical Origin Based on Antioxidant Activity, High-Throughput Metabolomics, and DNA RFLP Fingerprinting
Source: Antioxidants (Basel). 2023 May 21;12(5):1135. doi: 10.3390/antiox12051135 (PMC10215230; doi:10.3390/antiox12051135)
Supplement: Supplementary file 1 [file antioxidants-12-01135-s001.zip]

Archive with 10 entries (10 files):
- Supplementary Data File S1.pdf
- Supplementary Data File S2.pdf
- Supplementary- Figure S1.pdf
- Supplementary-Figure S2.pdf
- Supplementary-Figure S3.pdf
- Supplementary-Figure S4.pdf
- Supplementary-Figure S5.pdf
- Supplementary-Figure S6.pdf
- Supplementary-Table S1.pdf
- Supplementary-Table S2.pdf
